# Supplementary material for: New flavonoids from the Saudi Arabian plant Retama raetam which stimulates secretion of insulin and inhibits α-glucosidase
Source: Royal Society of Chemistry journal article supplement (doi:10.1039/c8ob02755b), 2019-01-01
Supplement: c8ob02755b1.pdf [file c8ob02755b1.pdf]

Isolation and Identification of Flavonoids from the Saudi Arabian Plant *Retama raetam* which Stimulate Secretion of Insulin and Inhibit  $\alpha$ -Glucosidase

Mohammad Nur-e-Alam,<sup>\*,a</sup> Muhammad Yousaf,<sup>a</sup> Ifat Parveen,<sup>b</sup> Rahman M. Hafizur,<sup>c</sup> Usman Ghani,<sup>d</sup> Sarfaraz Ahmed,<sup>a</sup> Abdul Hameed,<sup>c</sup> Michael D. Threadgill<sup>e</sup> and Adnan J. Al-Rehaily<sup>\*,a</sup>

<sup>a</sup>Department of Pharmacognosy, College of Pharmacy, King Saud University, P.O. Box. 2457, Riyadh 11451, Kingdom of Saudi Arabia

<sup>b</sup>Institute of Biological, Environmental & Rural Sciences (IBERS), Aberystwyth University, Aberystwyth SY23 3DA, United Kingdom

<sup>c</sup>Dr. Panjwani Center for Molecular Medicine and Drug Research, International Center for Chemical and Biological Sciences, University of Karachi, Karachi-75270, Pakistan

<sup>d</sup>Clinical Biochemistry Unit, Department of Pathology, College of Medicine, King Saud University, Riyadh 11461, Kingdom of Saudi Arabia

<sup>e</sup>Drug & Target Discovery, Department of Pharmacy and Pharmacology, University of Bath, Claverton Down, Bath BA2 7AY, United Kingdom

## Contents

Fig. S1: HRMS of **1**

Fig. S2:  $^1\text{H}$  NMR spectrum of **1**

Fig. S3: Expansion of  $^1\text{H}$  NMR spectrum of **1**

Fig. S4:  $^{13}\text{C}$  NMR spectrum of **1**

Fig. S5: COSY spectrum of **1**

Fig. S6: HMBC spectrum of **1**

Fig. S7: HSQC spectrum of **1**

Fig. S8: HRMS of **2**

Fig. S9:  $^1\text{H}$  NMR spectrum of **2**

Fig. S10: Expansion A of  $^1\text{H}$  NMR spectrum of **2**

Fig. S11: Expansion B of  $^1\text{H}$  NMR spectrum of **2**

Fig. S12:  $^{13}\text{C}$  NMR spectrum of **2**

Fig. S13: COSY spectrum of **2**

Fig. S14: HMBC spectrum of **2**

Fig. S15: HSQC spectrum of **2**

Fig. S16: NOESY spectrum of **2**

Fig. S17: HRMS of **3**

Fig. S18:  $^1\text{H}$  NMR spectrum of **3**

Fig. S19: Expansion of  $^1\text{H}$  NMR spectrum of **3**

Fig. S20:  $^{13}\text{C}$  NMR spectrum of **3**

Fig. S21: COSY spectrum of **3**

Fig. S22: HMBC spectrum of **3**  
Fig. S23: HSQC spectrum of **3**  
Fig. S24: NOESY spectrum of **3**  
Fig. S25:  $^1\text{H}$  NMR spectrum of **4**  
Fig. S26: Expansion of  $^1\text{H}$  NMR spectrum of **4**  
Fig. S27:  $^{13}\text{C}$  NMR spectrum of **4**  
Fig. S28: COSY spectrum of **4**  
Fig. S29: HMBC spectrum of **4**  
Fig. S30: HSQC spectrum of **4**  
Fig. S31: HRMS of compound **5**  
Fig. S32:  $^1\text{H}$  NMR spectrum of **5**  
Fig. S33: Expansion of  $^1\text{H}$  NMR spectrum of **5**  
Fig. S34:  $^{13}\text{C}$  NMR spectrum of **5**  
Fig. S35: COSY spectrum of **5**  
Fig. S36: HMBC spectrum of **5**  
Fig. S37: HSQC spectrum of **5**  
Fig. S38: NOESY spectrum of **5**  
Fig. S39: HRMS of **6**  
Fig. S40:  $^1\text{H}$  NMR spectrum of **6**  
Fig. S41: Expansion of  $^1\text{H}$  NMR spectrum of **6**  
Fig. S42:  $^{13}\text{C}$  NMR spectrum of **6**  
Fig. S43: COSY spectrum of **6**

Fig. S44: HMBC spectrum of **6**  
Fig. S45: HSQC spectrum of **6**  
Fig. S46: NOESY spectrum of **6**  
Fig. S47: HRMS of **7**  
Fig. S48:  $^1\text{H}$  NMR spectrum of **7**  
Fig. S49:  $^{13}\text{C}$  NMR spectrum of **7**  
Fig. S50: COSY spectrum spectrum of **7**  
Fig. S51: HMBC spectrum of **7**  
Fig. S52: HSQC spectrum of **7**  
Fig. S53: HRMS of **8**  
Fig. S54:  $^1\text{H}$  NMR spectrum of **8**  
Fig. S55: Expansion A of  $^1\text{H}$  NMR spectrum of **8**  
Fig. S56: Expansion B of  $^1\text{H}$  NMR spectrum of **8**  
Fig. S57:  $^{13}\text{C}$  NMR spectrum of **8**  
Fig. S58: COSY spectrum of **8**  
Fig. S59: HMBC spectrum of **8**  
Fig. S60: HSQC spectrum of **8**  
Fig. S61:  $^1\text{H}$  NMR spectrum of **9**  
Fig. S62: Expansion of  $^1\text{H}$  NMR spectrum of **9**  
Fig. S63:  $^{13}\text{C}$  NMR spectrum of **9**  
Fig. S64: COSY spectrum of **9**  
Fig. S65: HMBC spectrum of **9**

Fig. 66: HSQC spectrum of **9**

Fig. 67:  $^1\text{H}$  NMR spectrum of **10**

Fig. 68: Expansion of  $^1\text{H}$  NMR spectrum of **10**

Fig. 69:  $^{13}\text{C}$  NMR spectrum of **10**

Fig. 70: COSY spectrum of **10**

Fig. 71: HMBC spectrum of **10**

Fig. 72: HSQC spectrum of **10**

Fig. S73: CD spectrum of **2**

Fig. S74: CD spectrum of **5**

Fig. S75: CD spectrum of **8**

Table S1:  $^1\text{H}$  and  $^{13}\text{C}$  NMR spectroscopic data for **4,9,10** in  $(\text{CD}_3)_2\text{SO}$  [ $\delta_{\text{H}}$ , multiplicity ( $J$  (Hz));  $\delta_{\text{C}}$ , type]

Table S2: Insulin secretion data

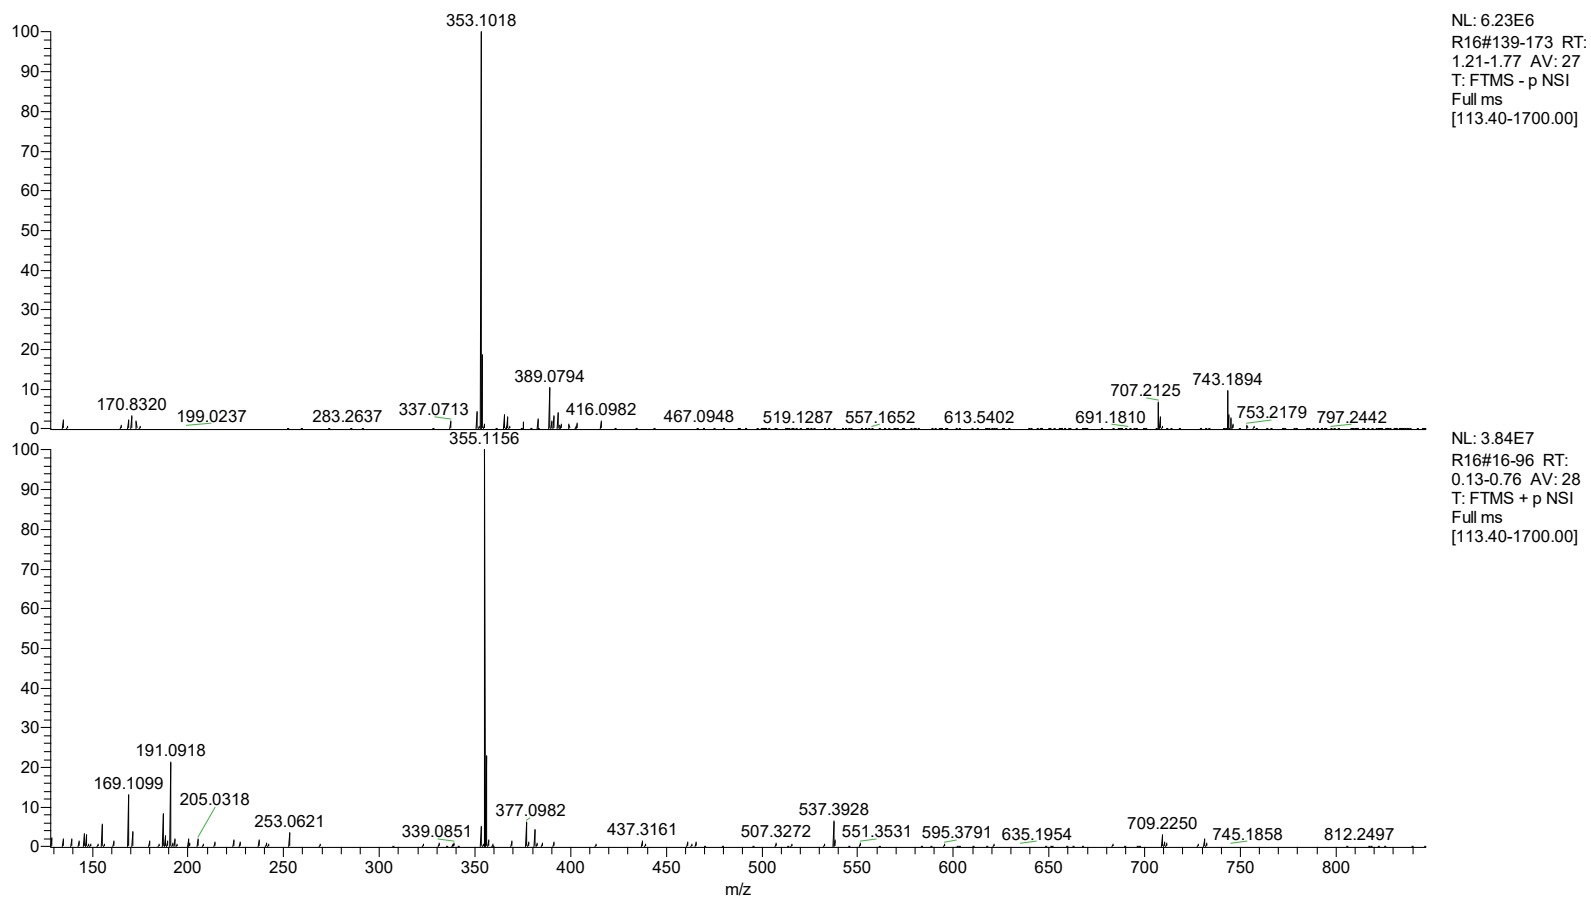

Fig. S1. HRMS of 1

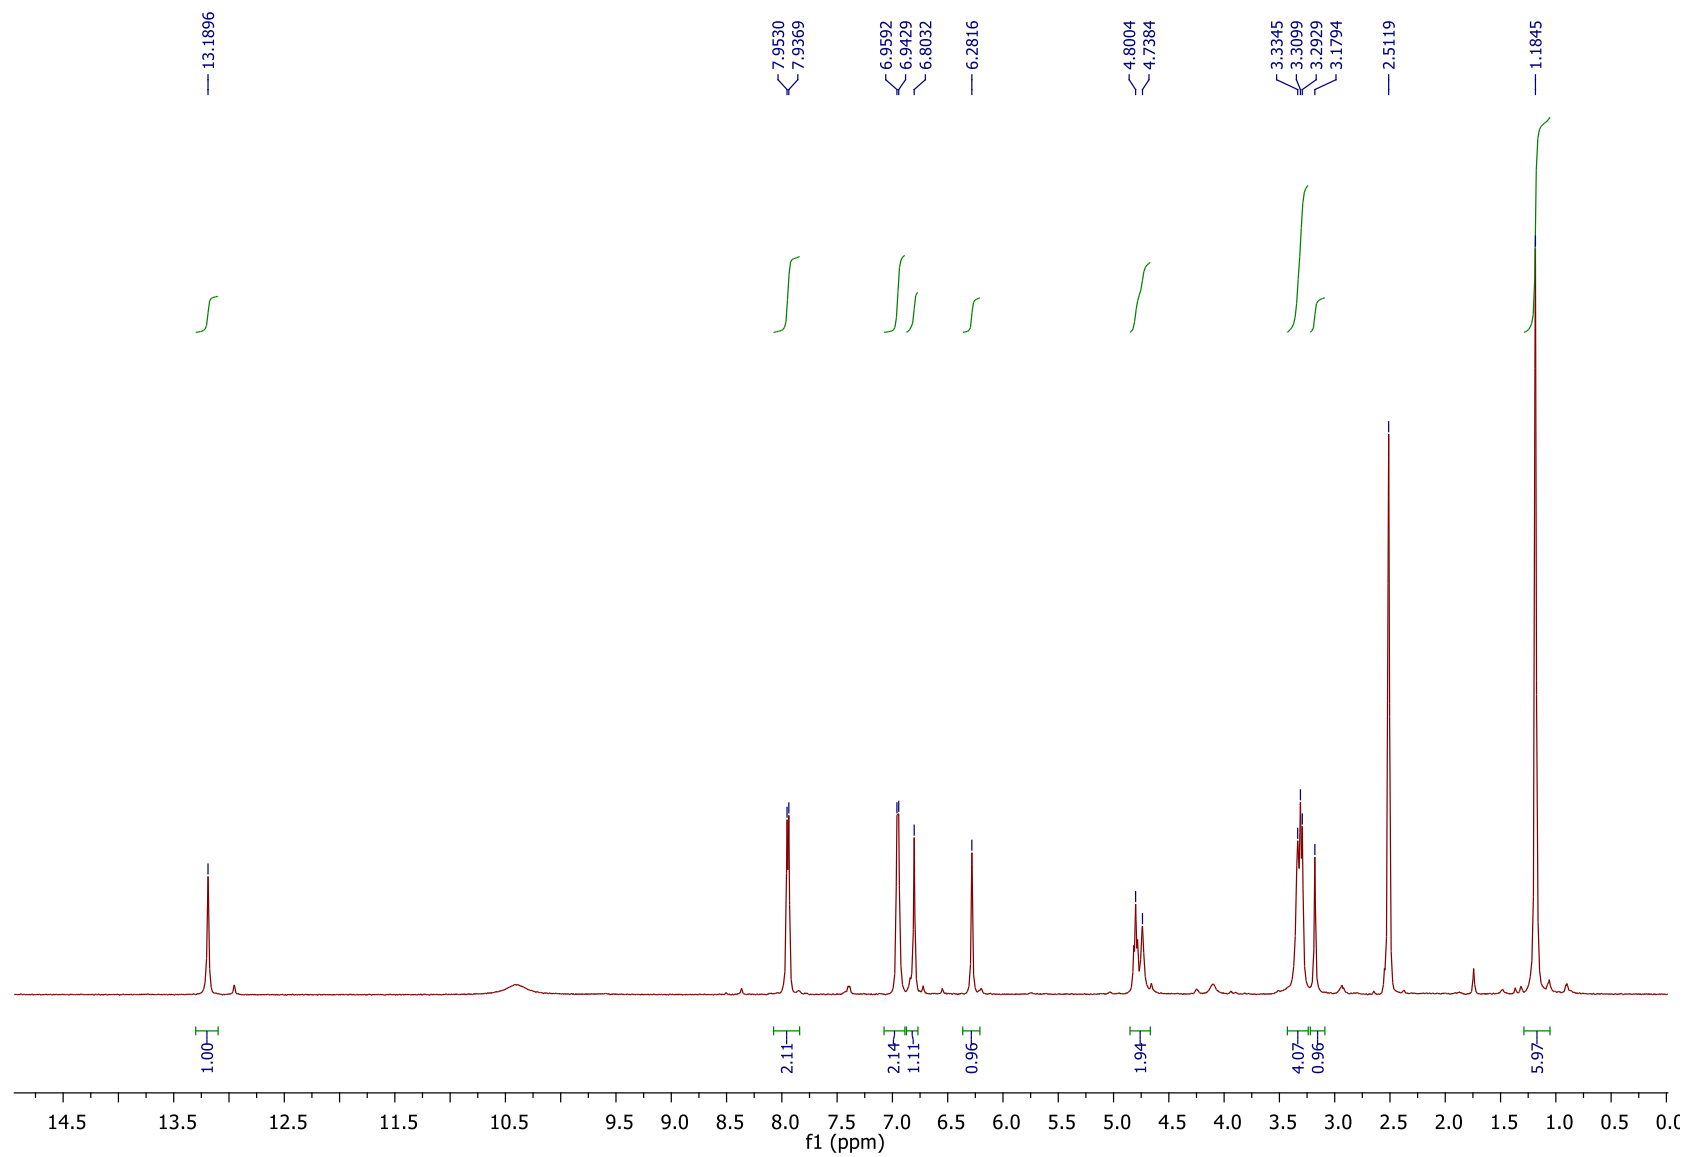

Fig. S2. <sup>1</sup>H NMR spectrum of **1**

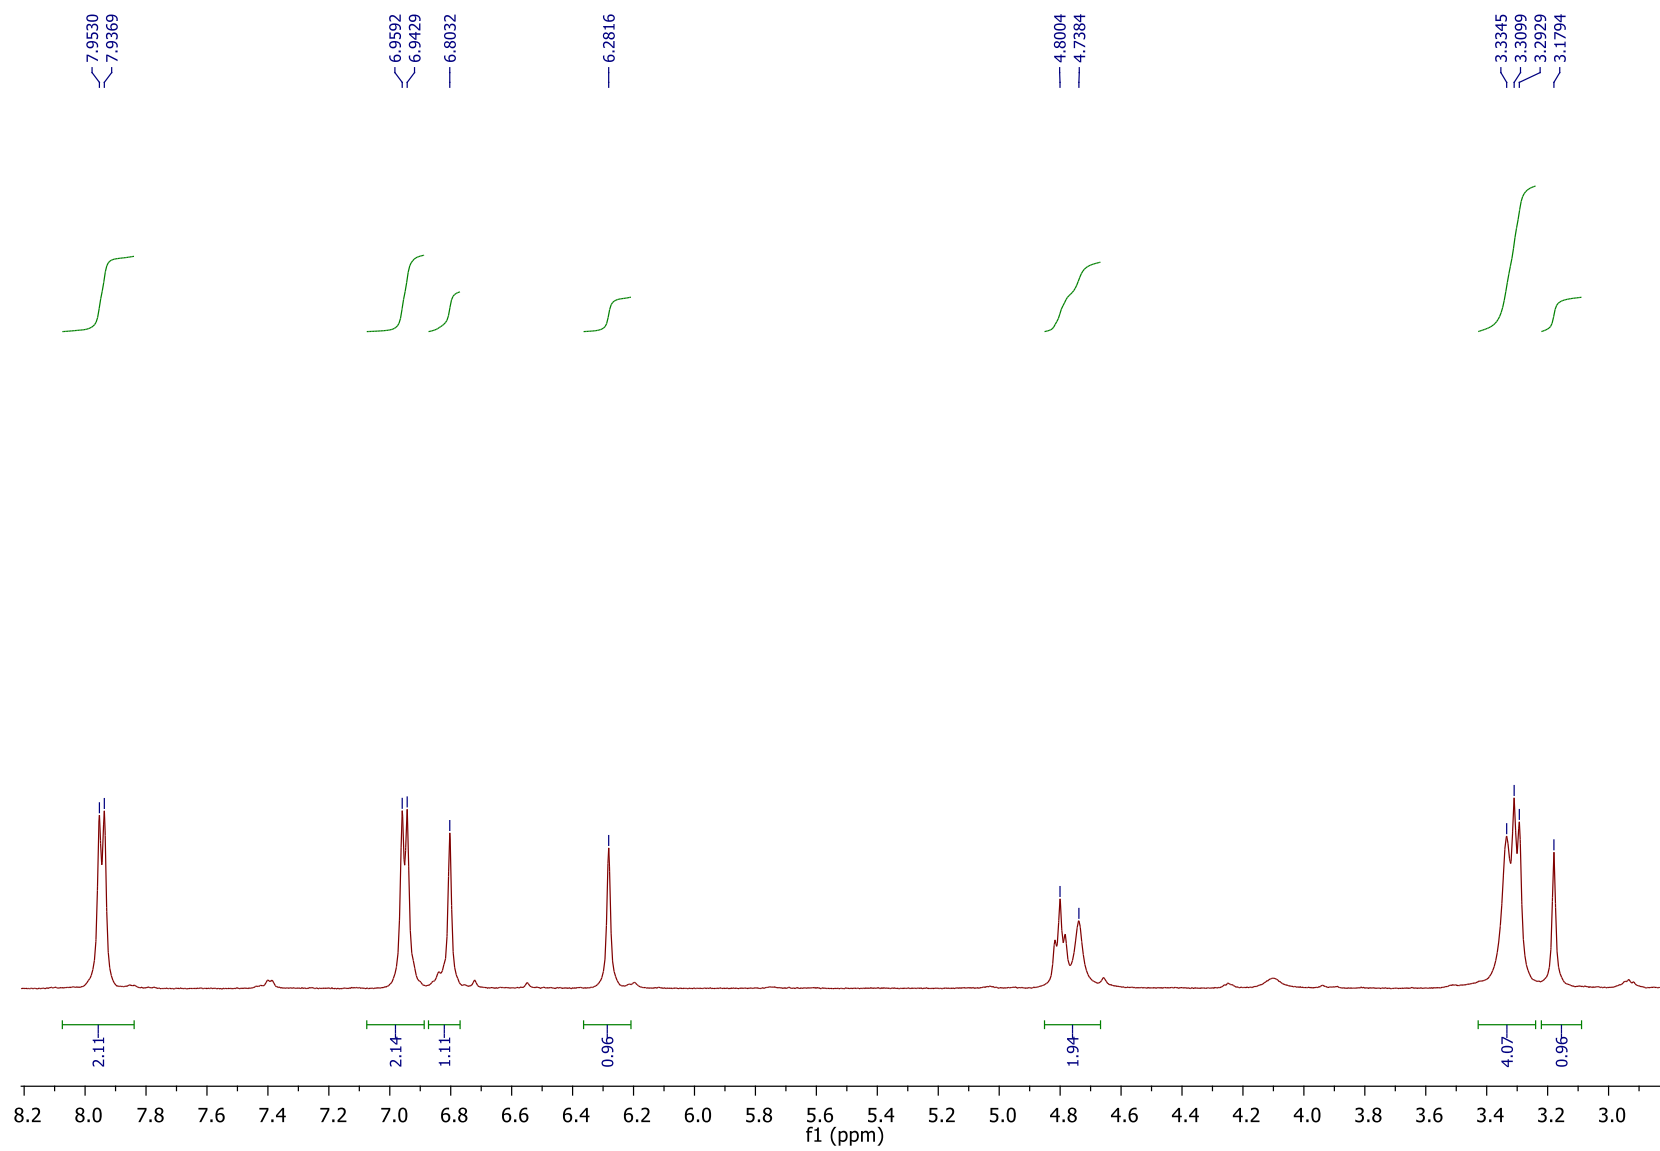

**Fig. S3.** Expansion of  $^1\text{H}$  NMR spectrum of **1**



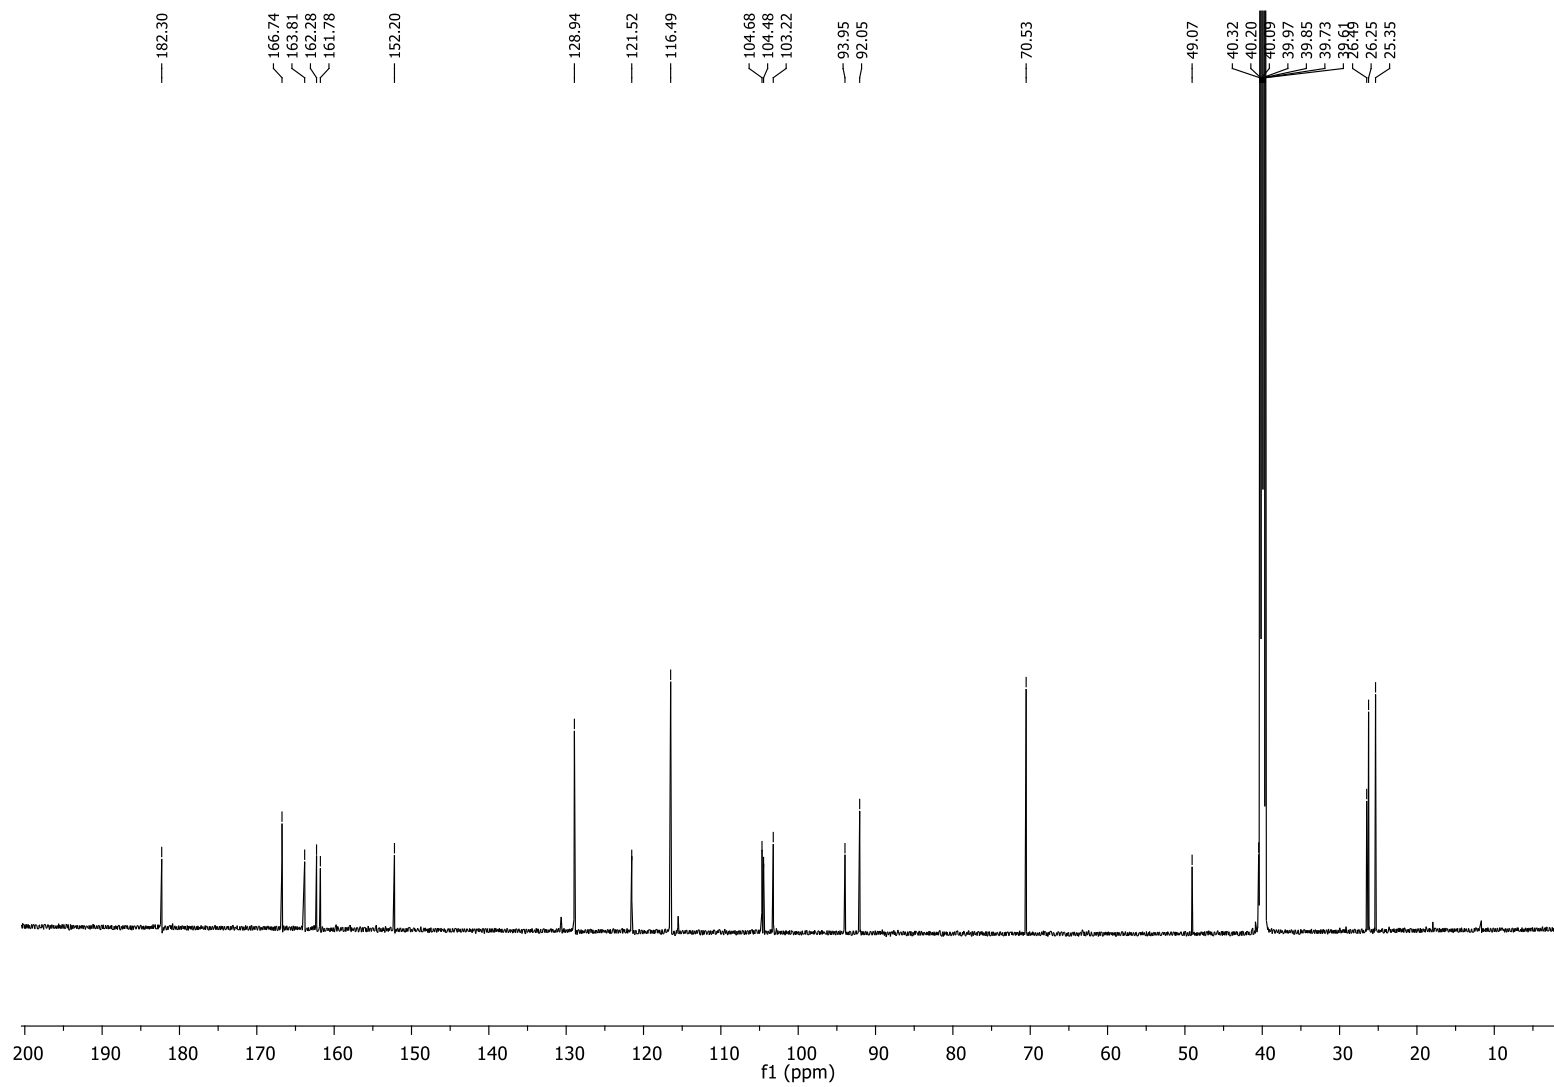

**Fig. S4.**  $^{13}\text{C}$  NMR spectrum of **1**

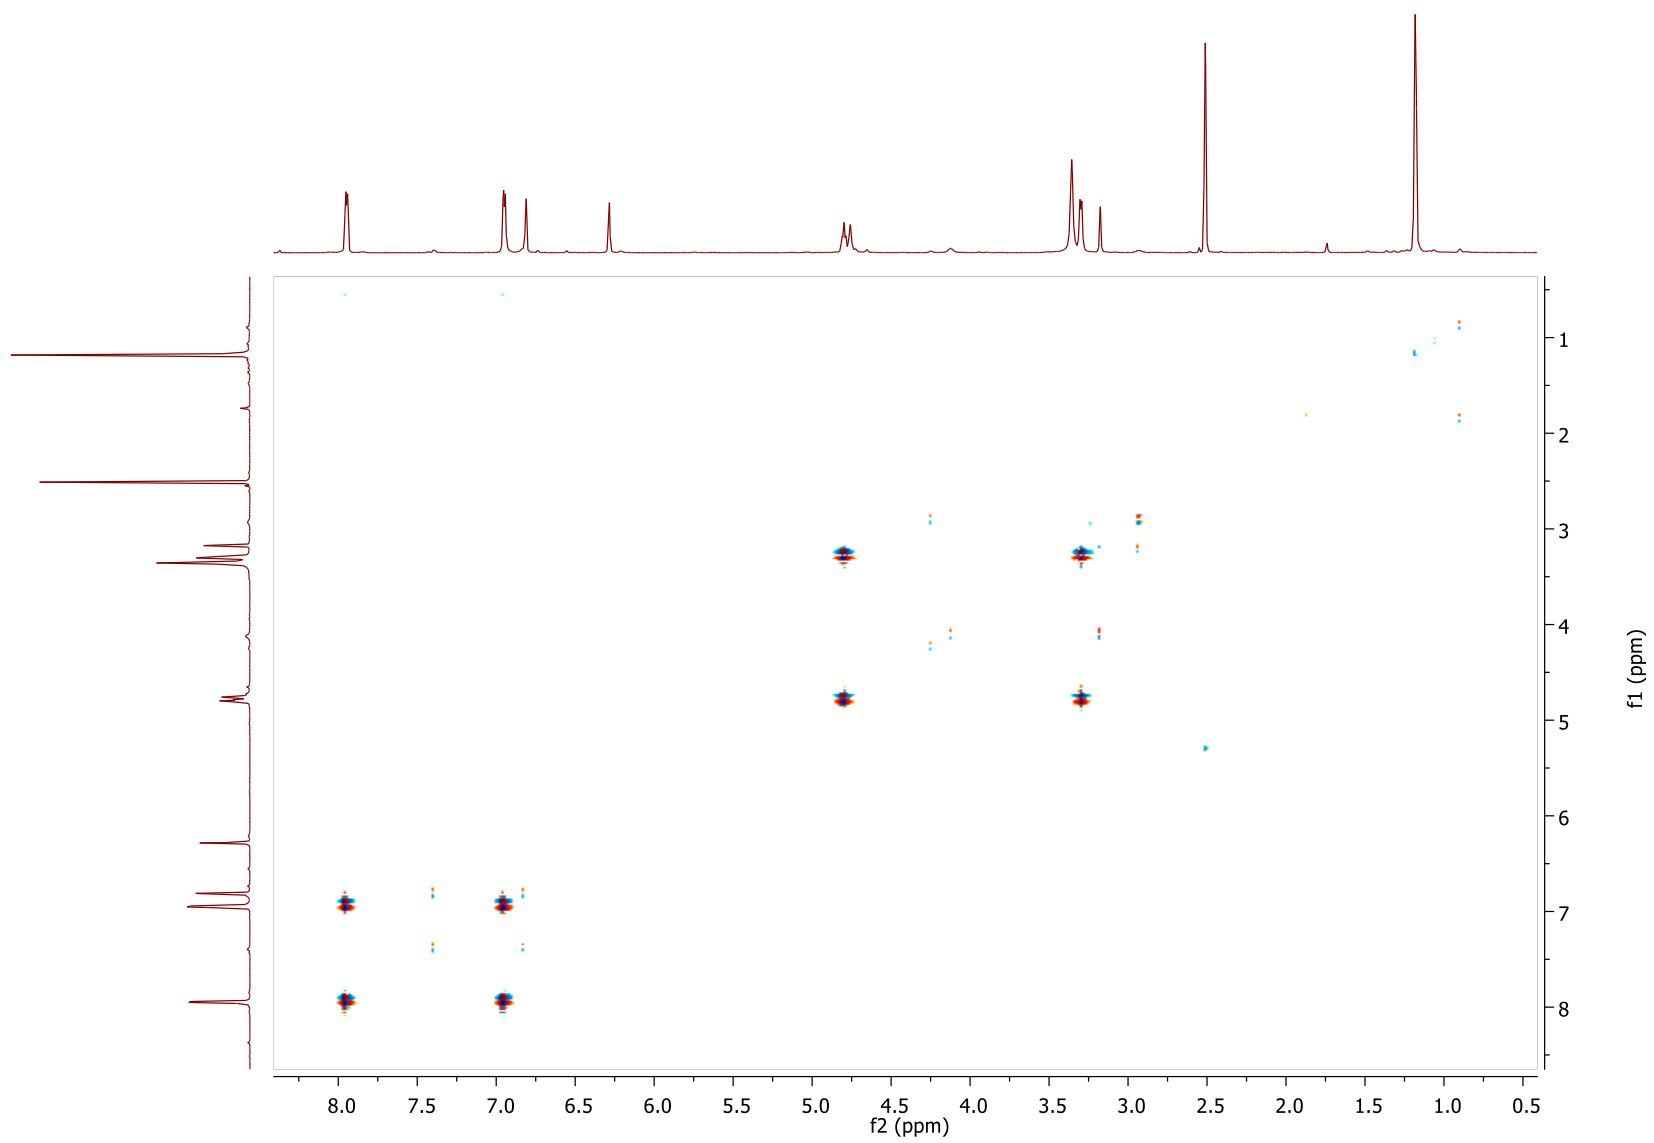

**Fig. S5.** COSY spectrum of **1**

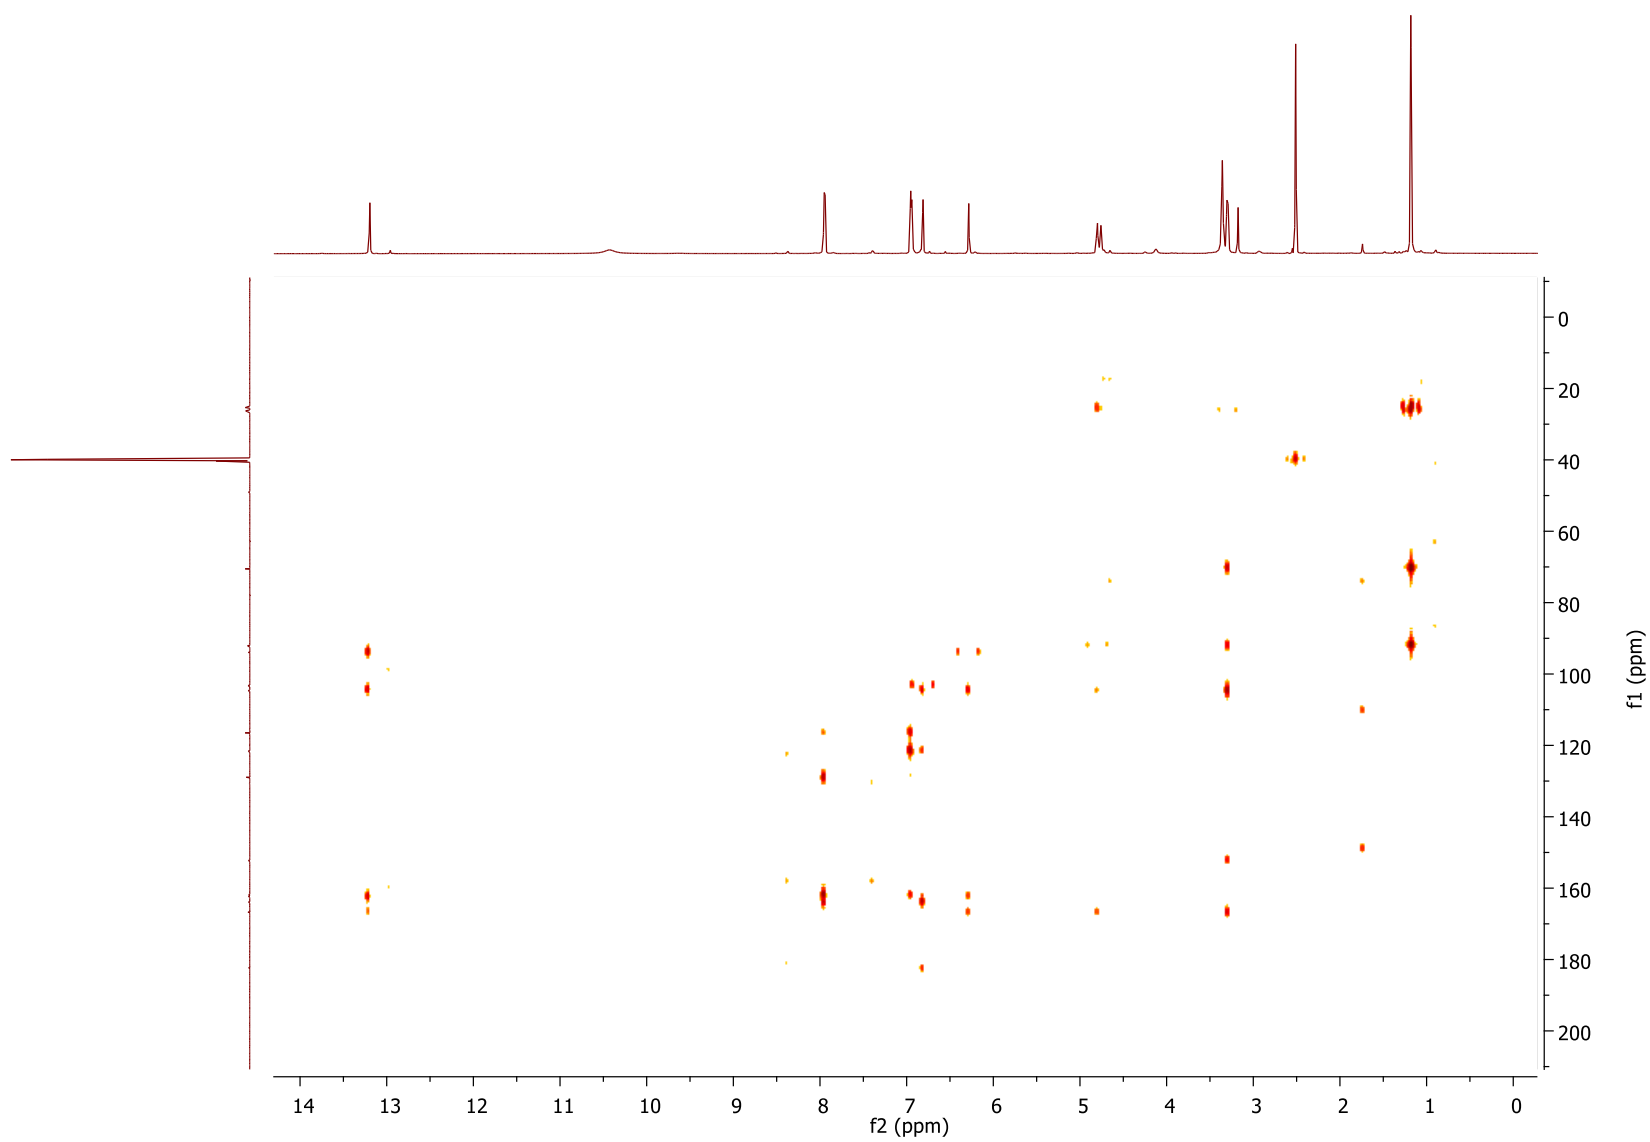

**Fig. S6.** HMBC spectrum of **1**

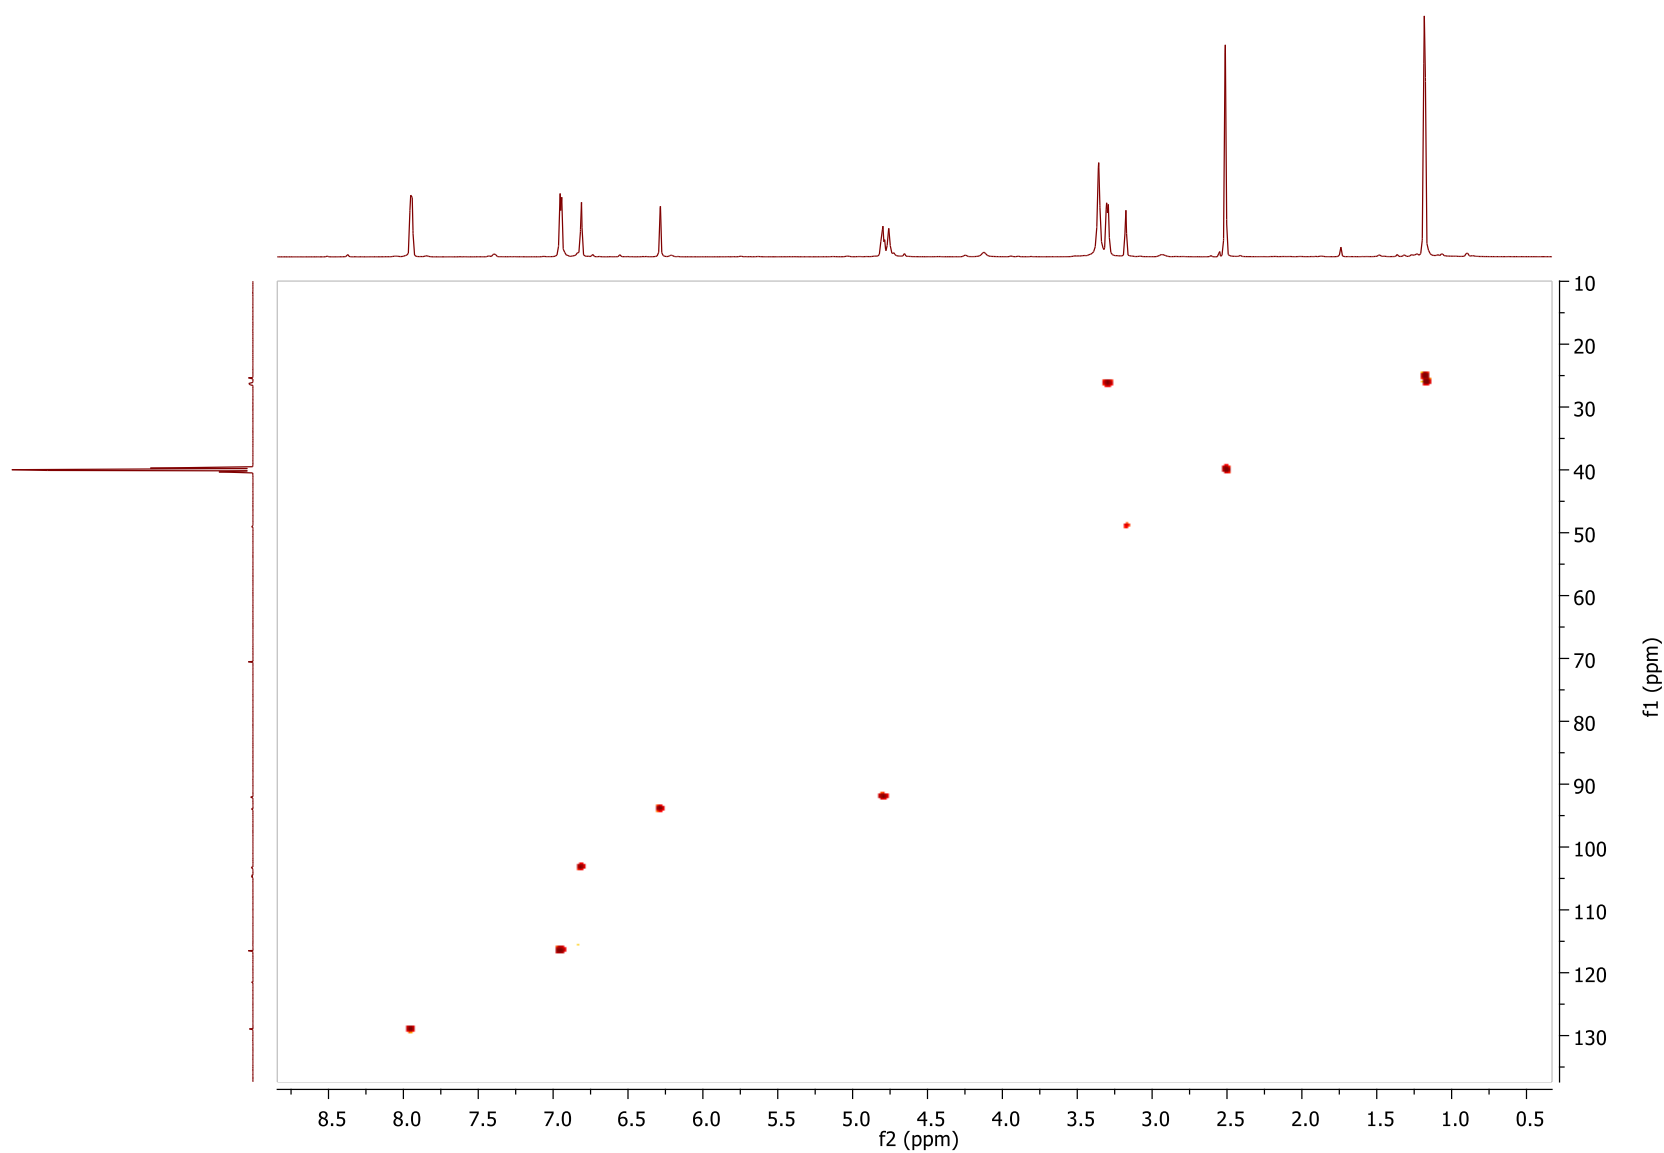

Fig. S7. HSQC spectrum of **1**

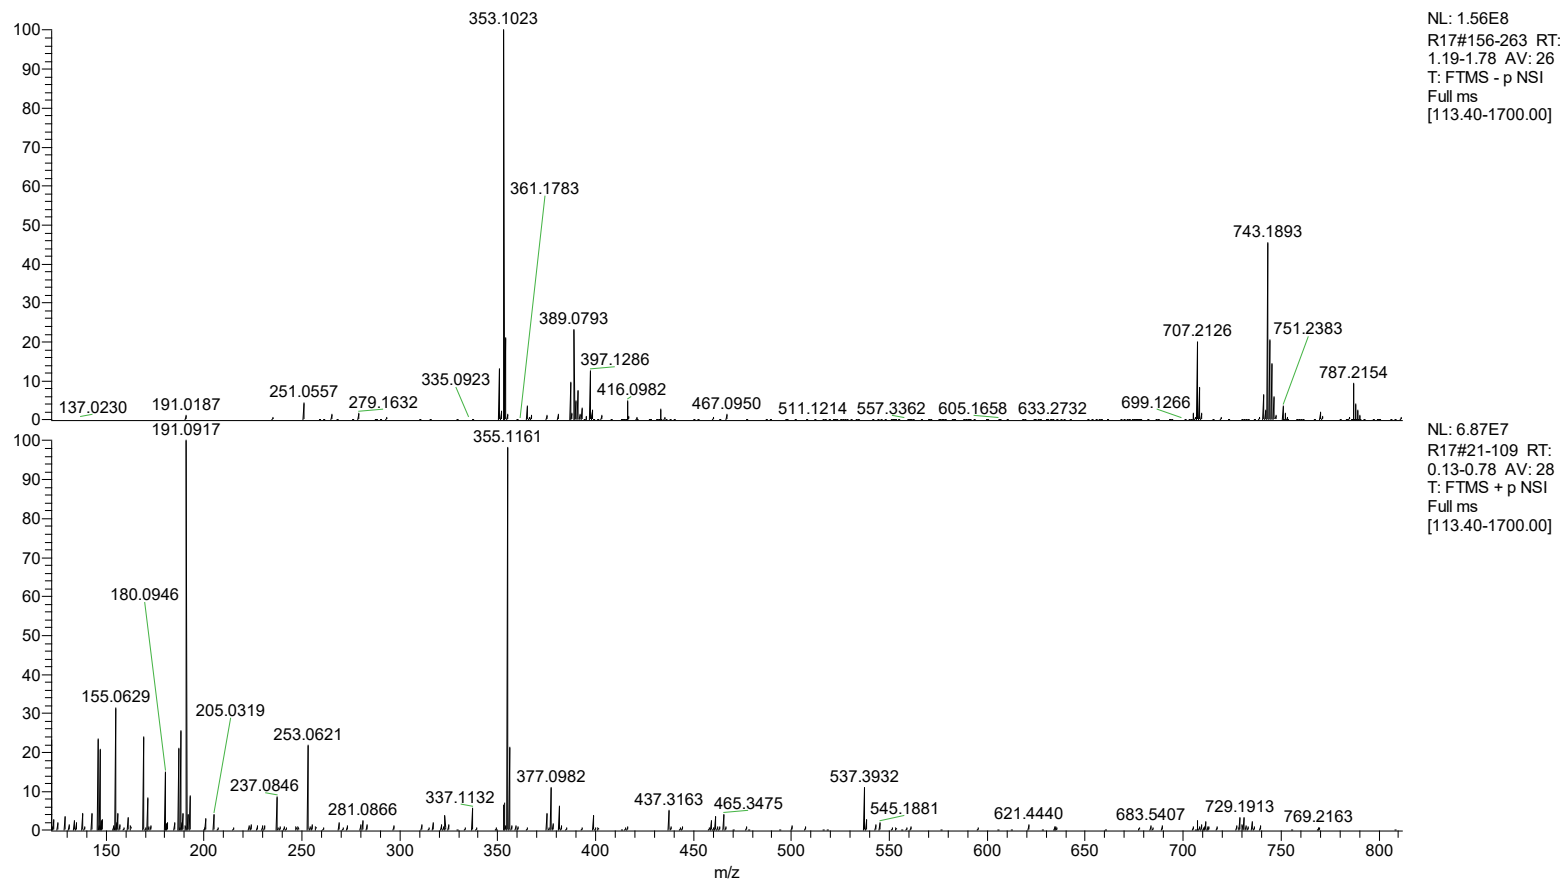

Fig. S8. HRMS of 2

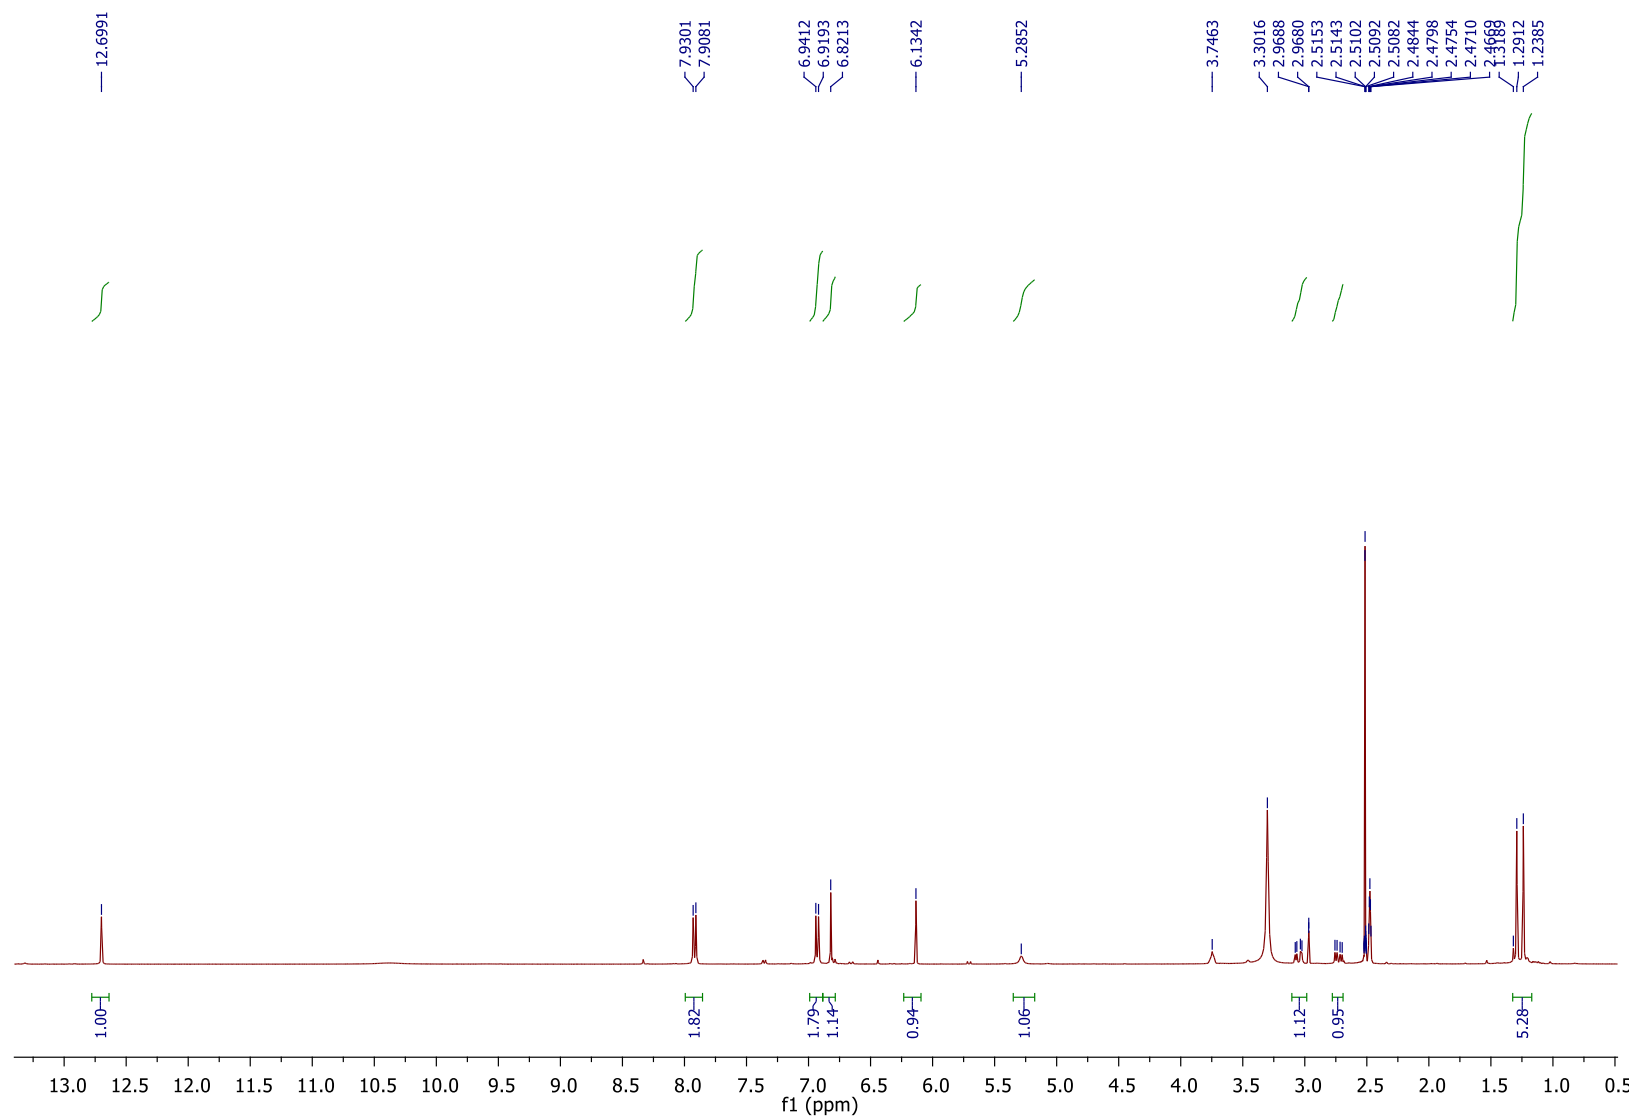

Fig. S9.  $^1\text{H}$  NMR spectrum of 2

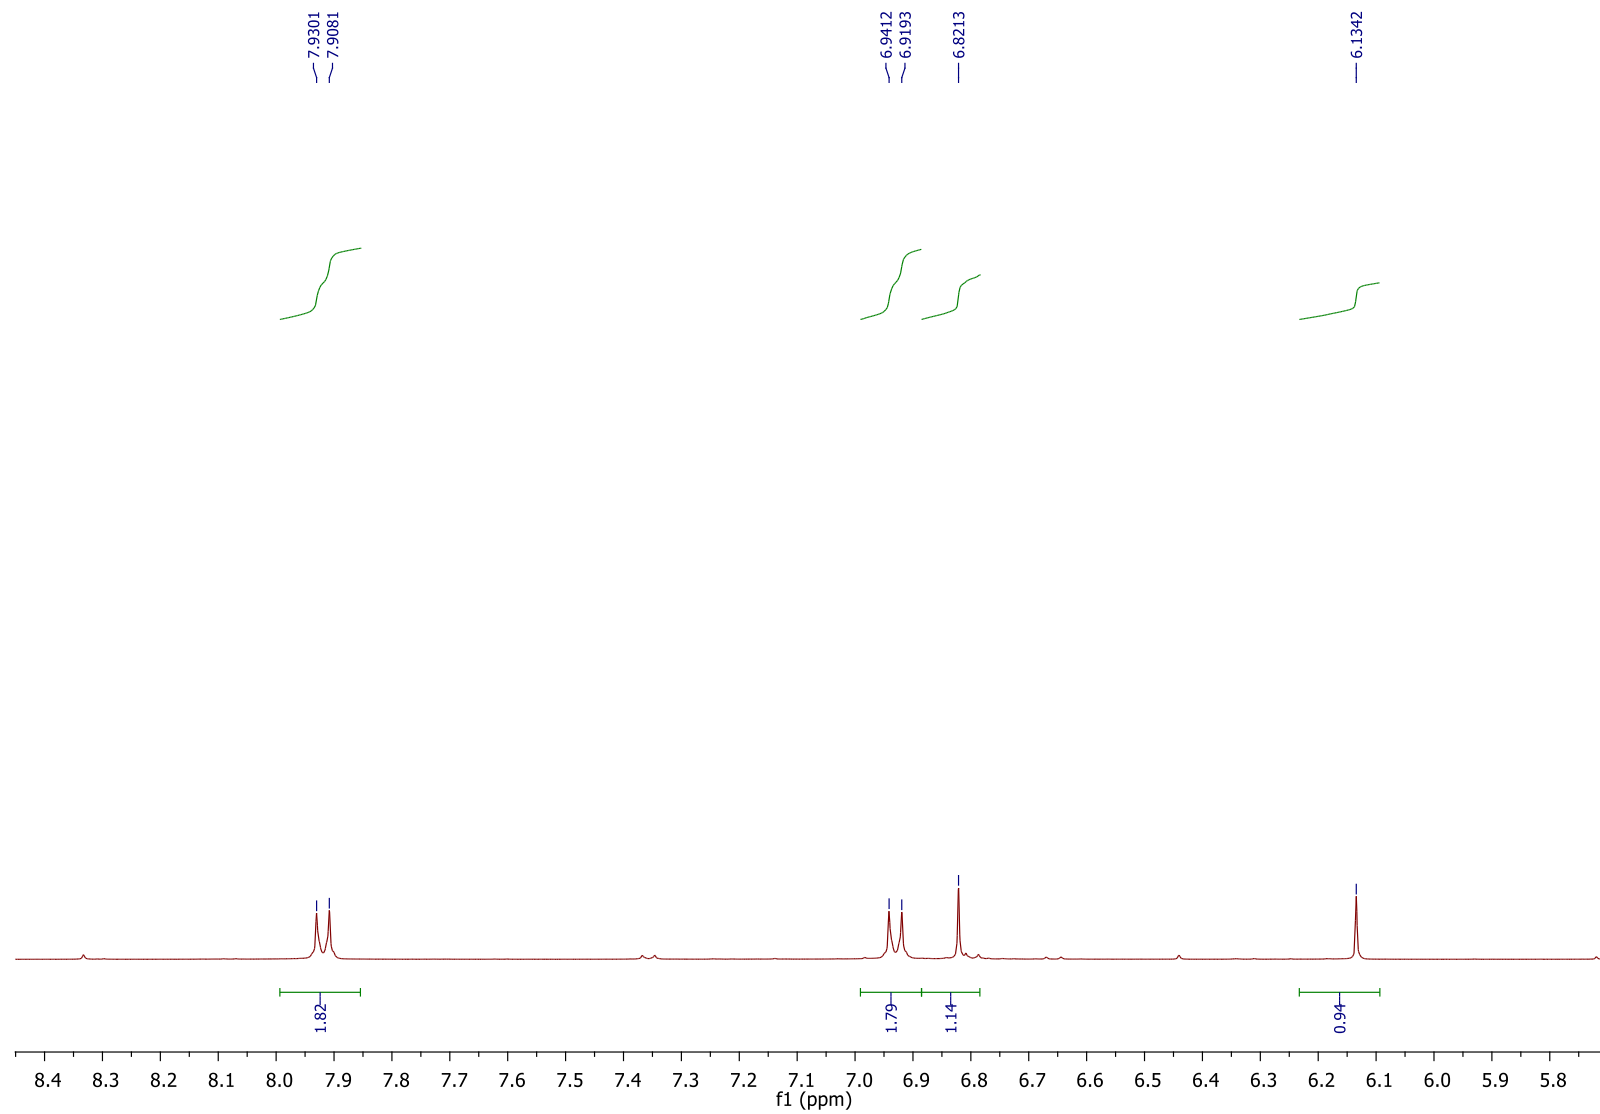

**Fig. S10.** Expansion A of  $^1\text{H}$  NMR spectrum of **2**

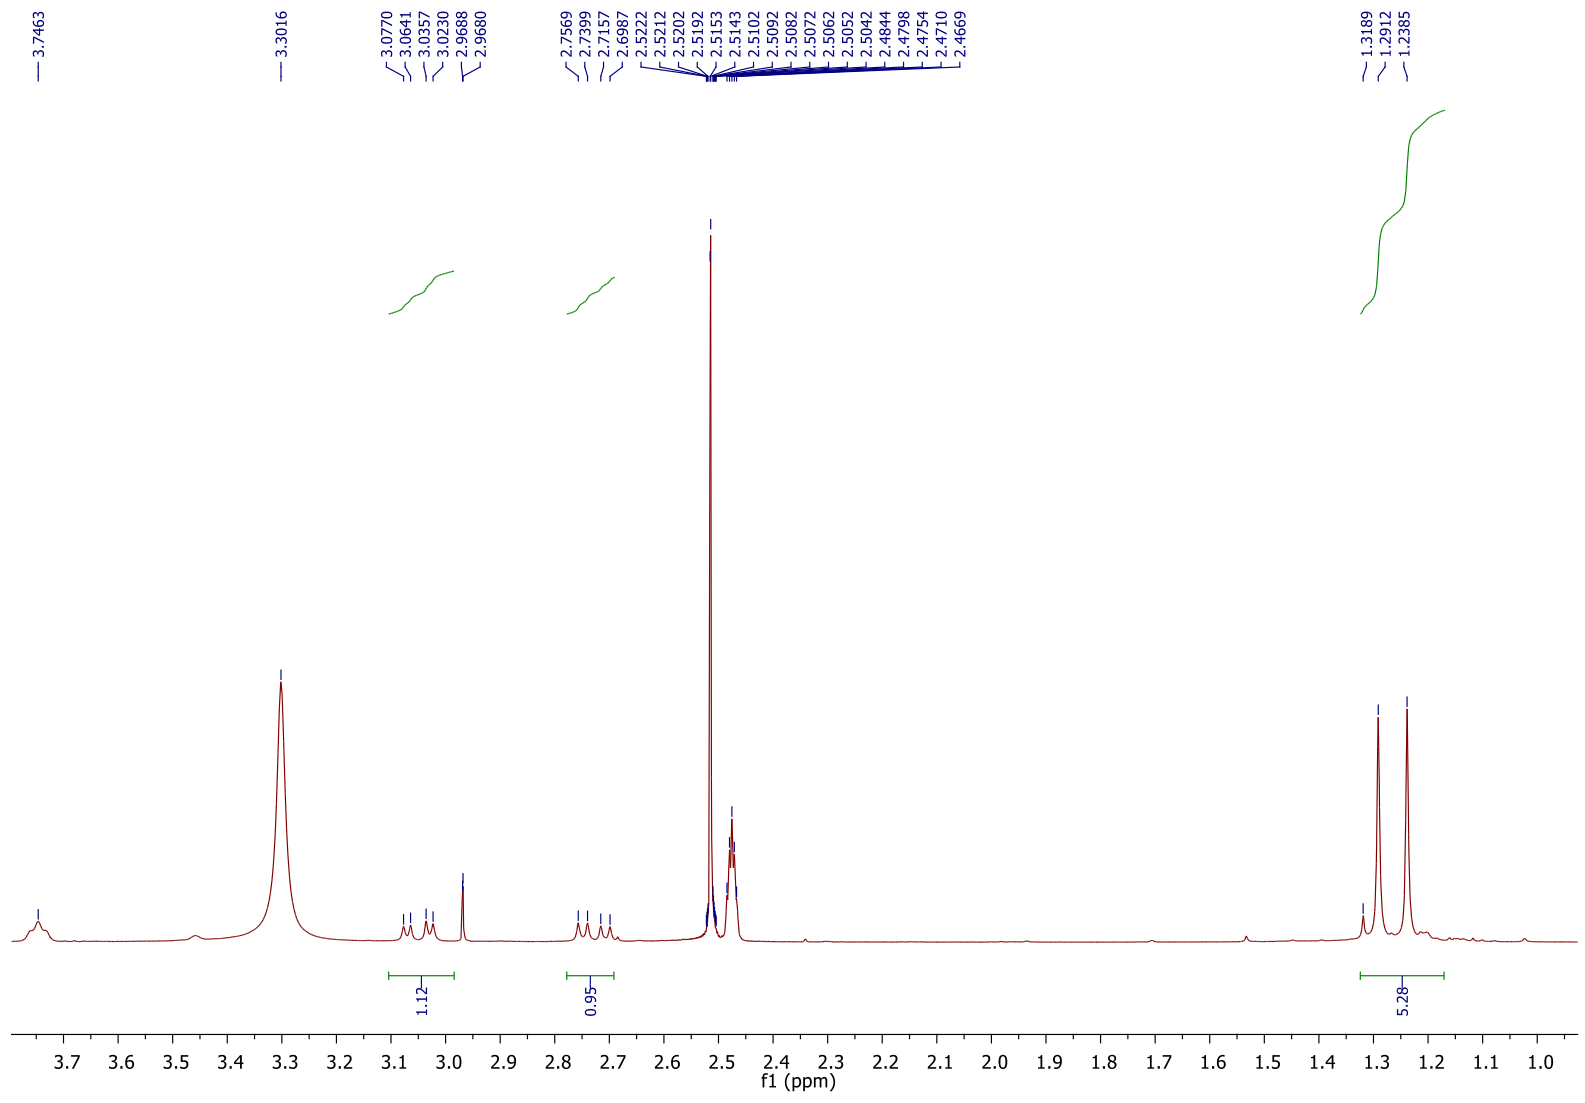

Fig. S11. Expansion B of <sup>1</sup>H NMR of 2



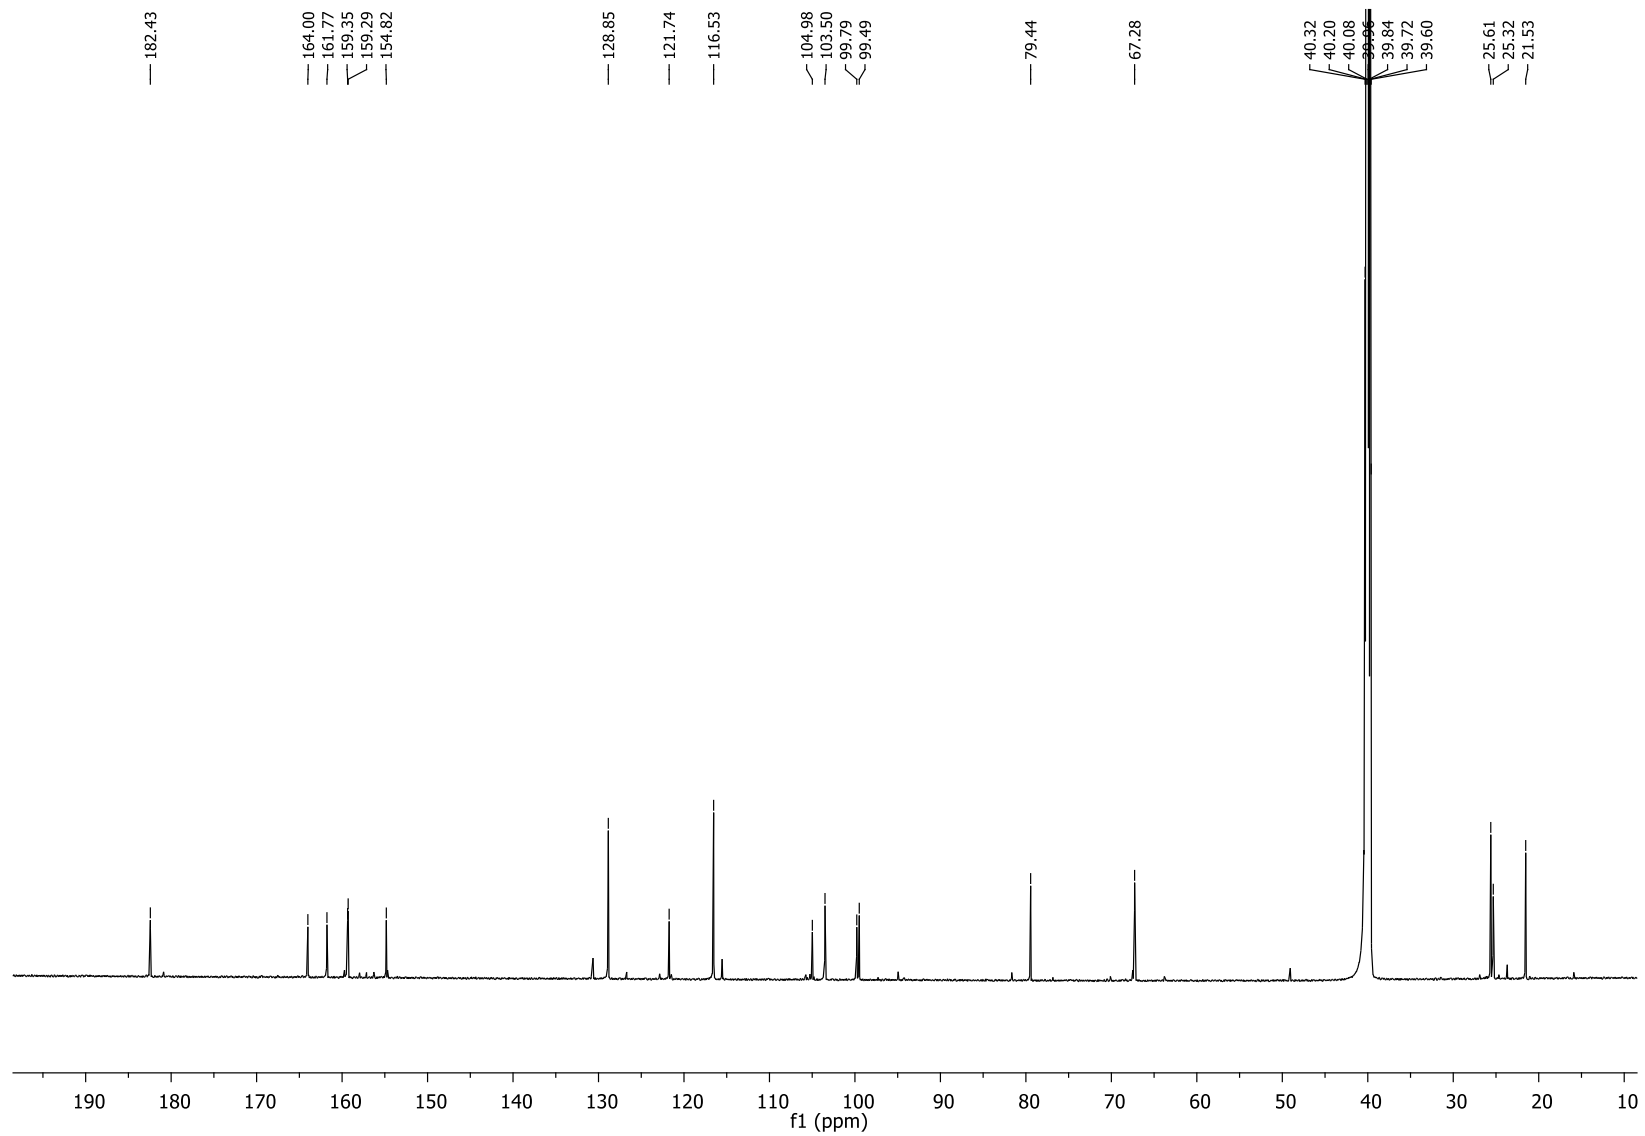

Fig. S12.  $^{13}\text{C}$  NMR spectrum of 2

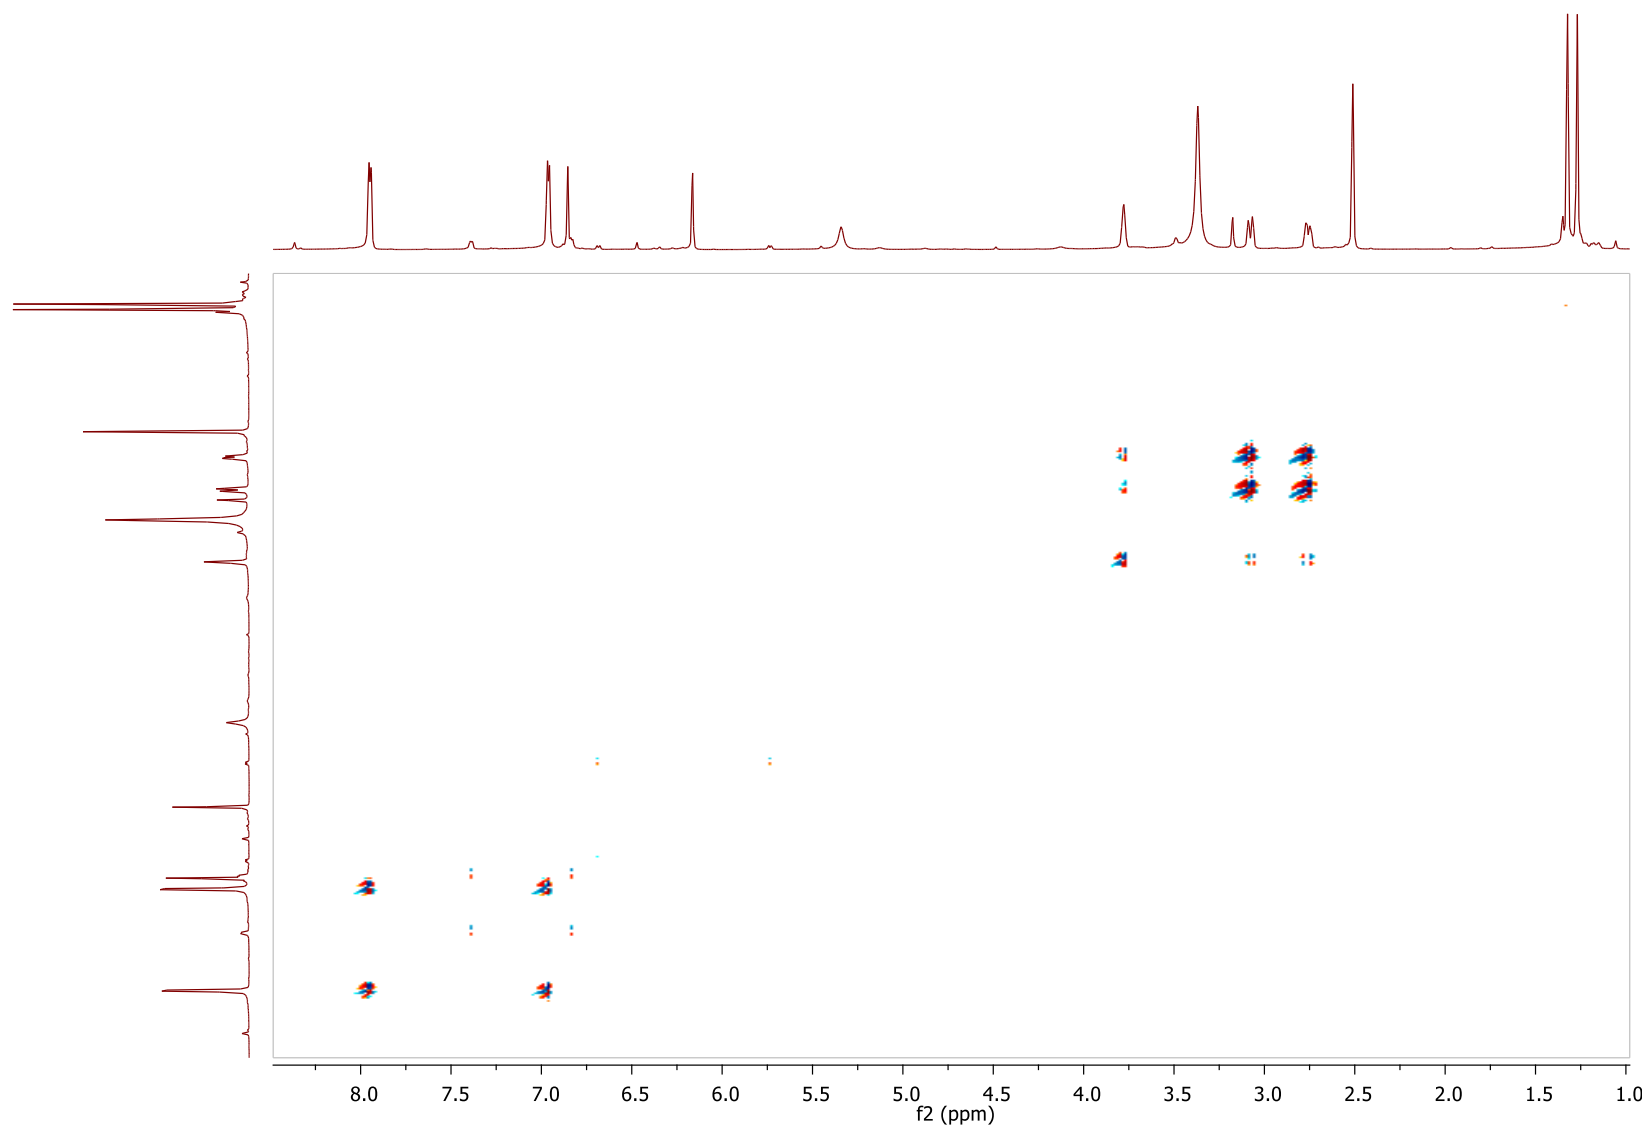

**Fig. S13.** COSY spectrum of **2**

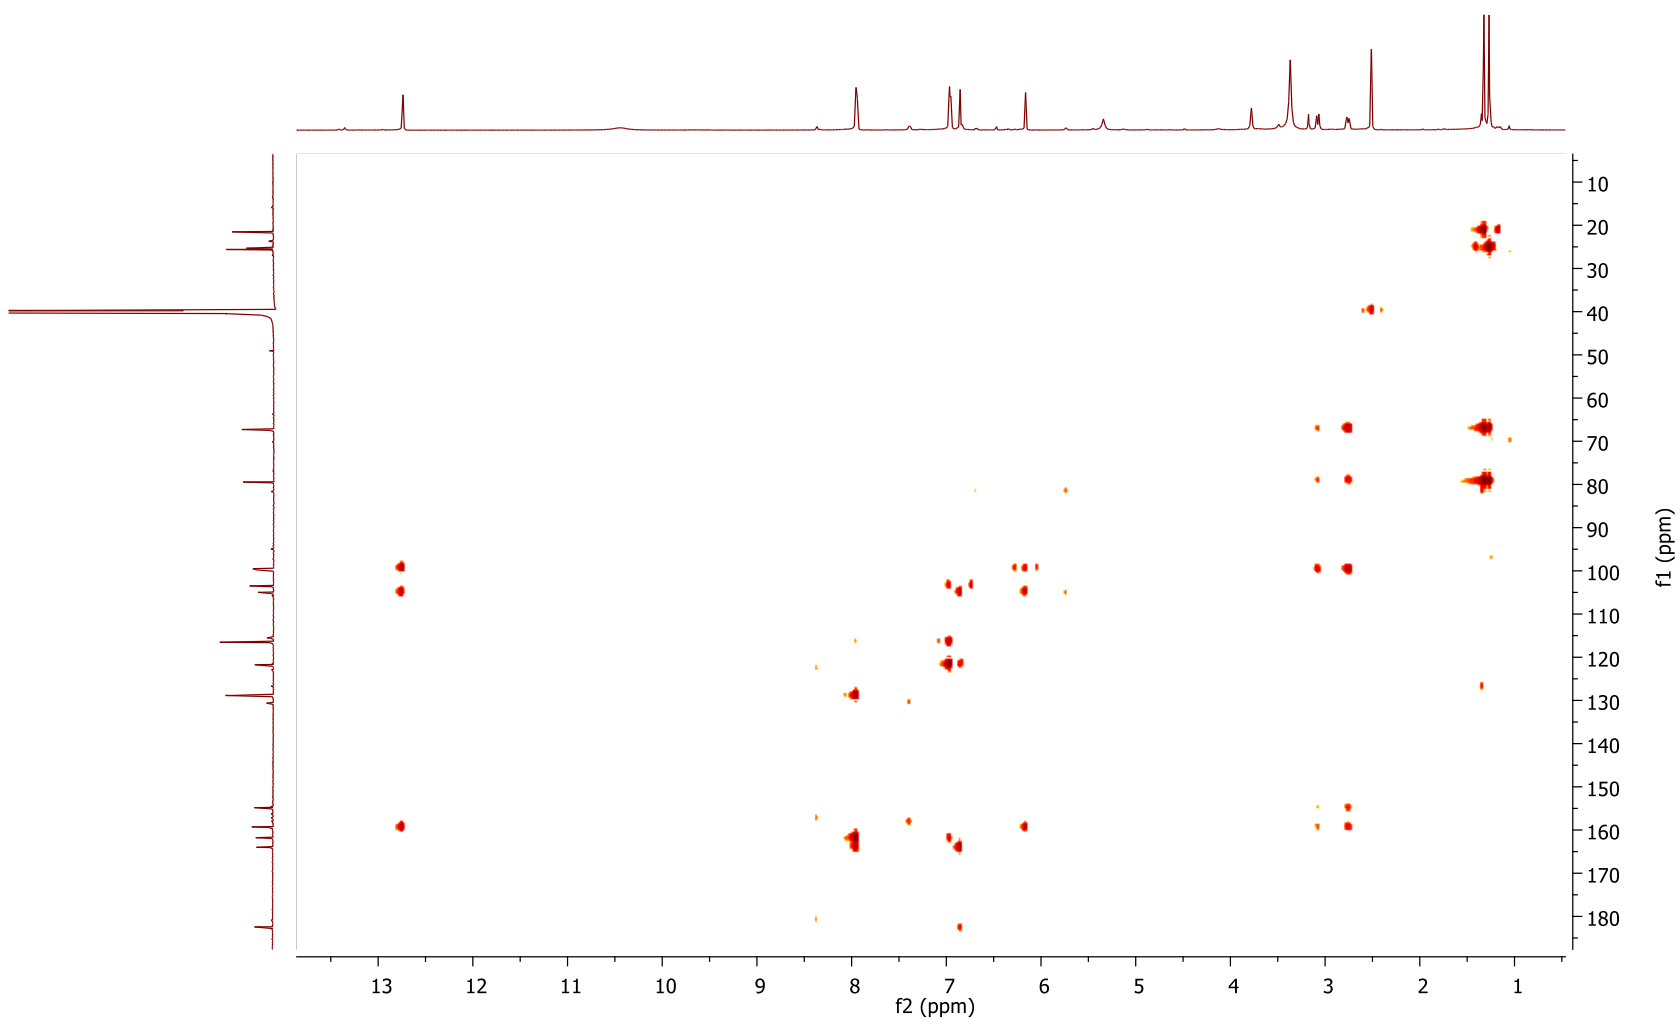

Fig. S14. HMBC spectrum of 2

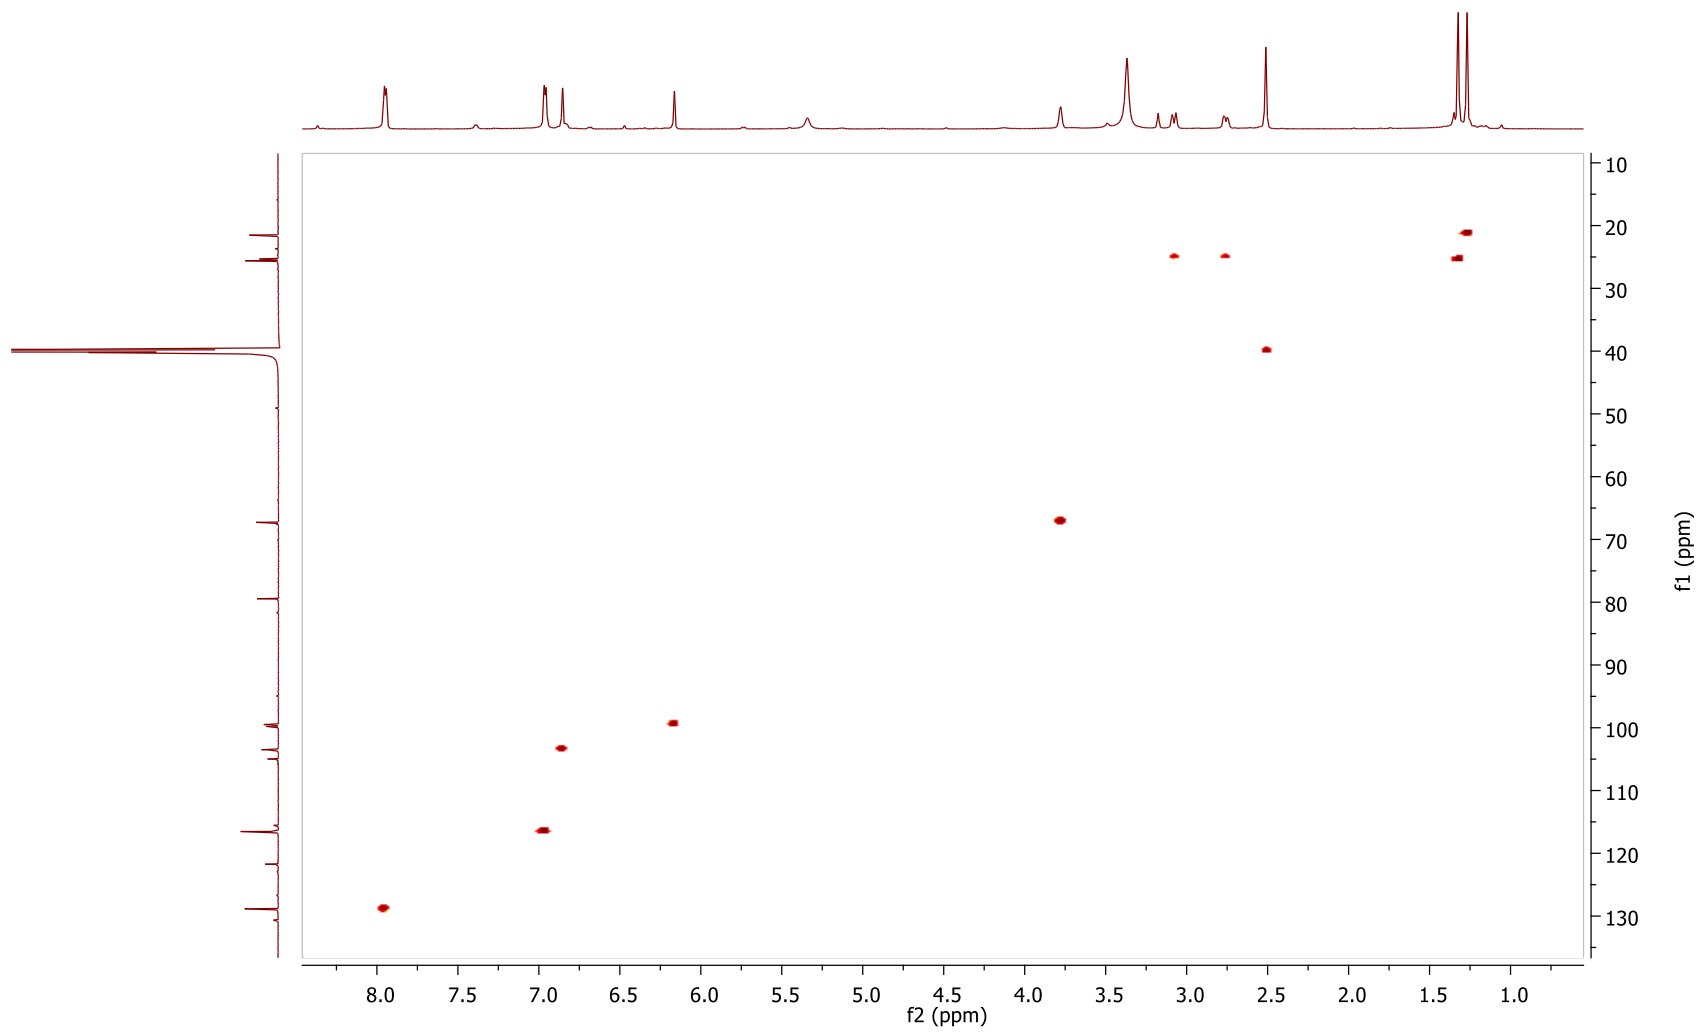

Fig. S15. HSQC spectrum of 2

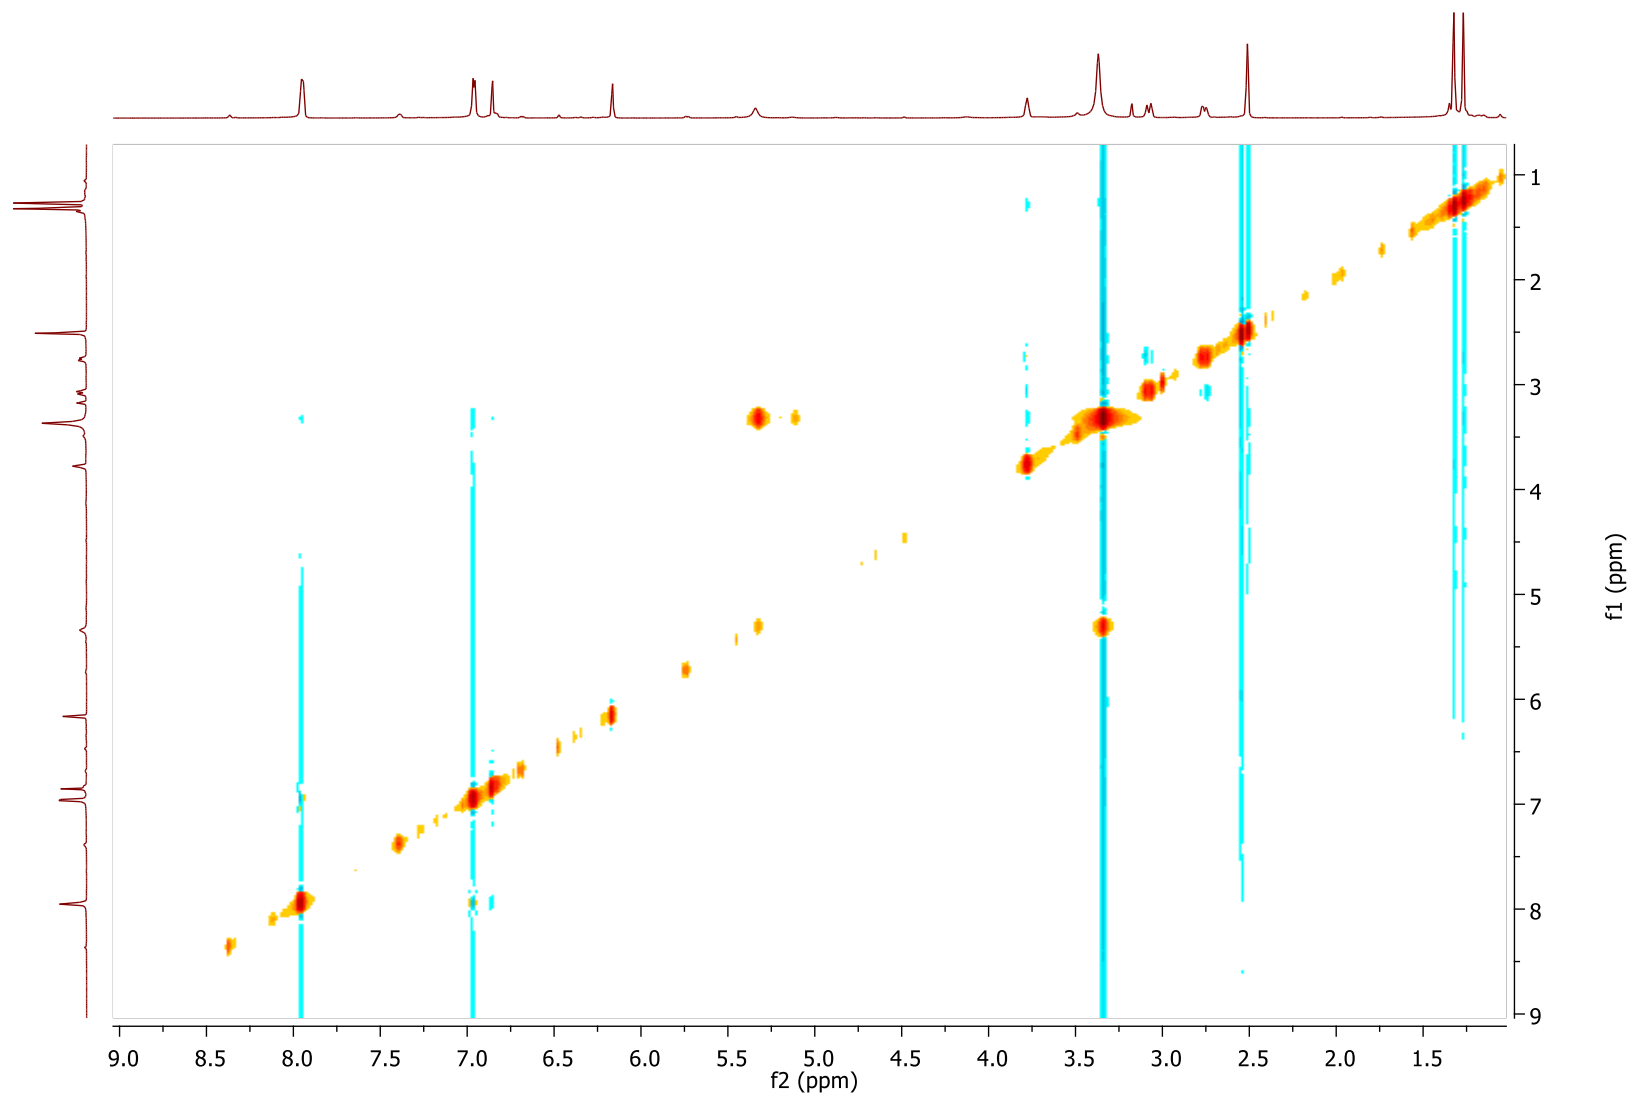

**Fig. S16.** NOESY spectrum of **2**

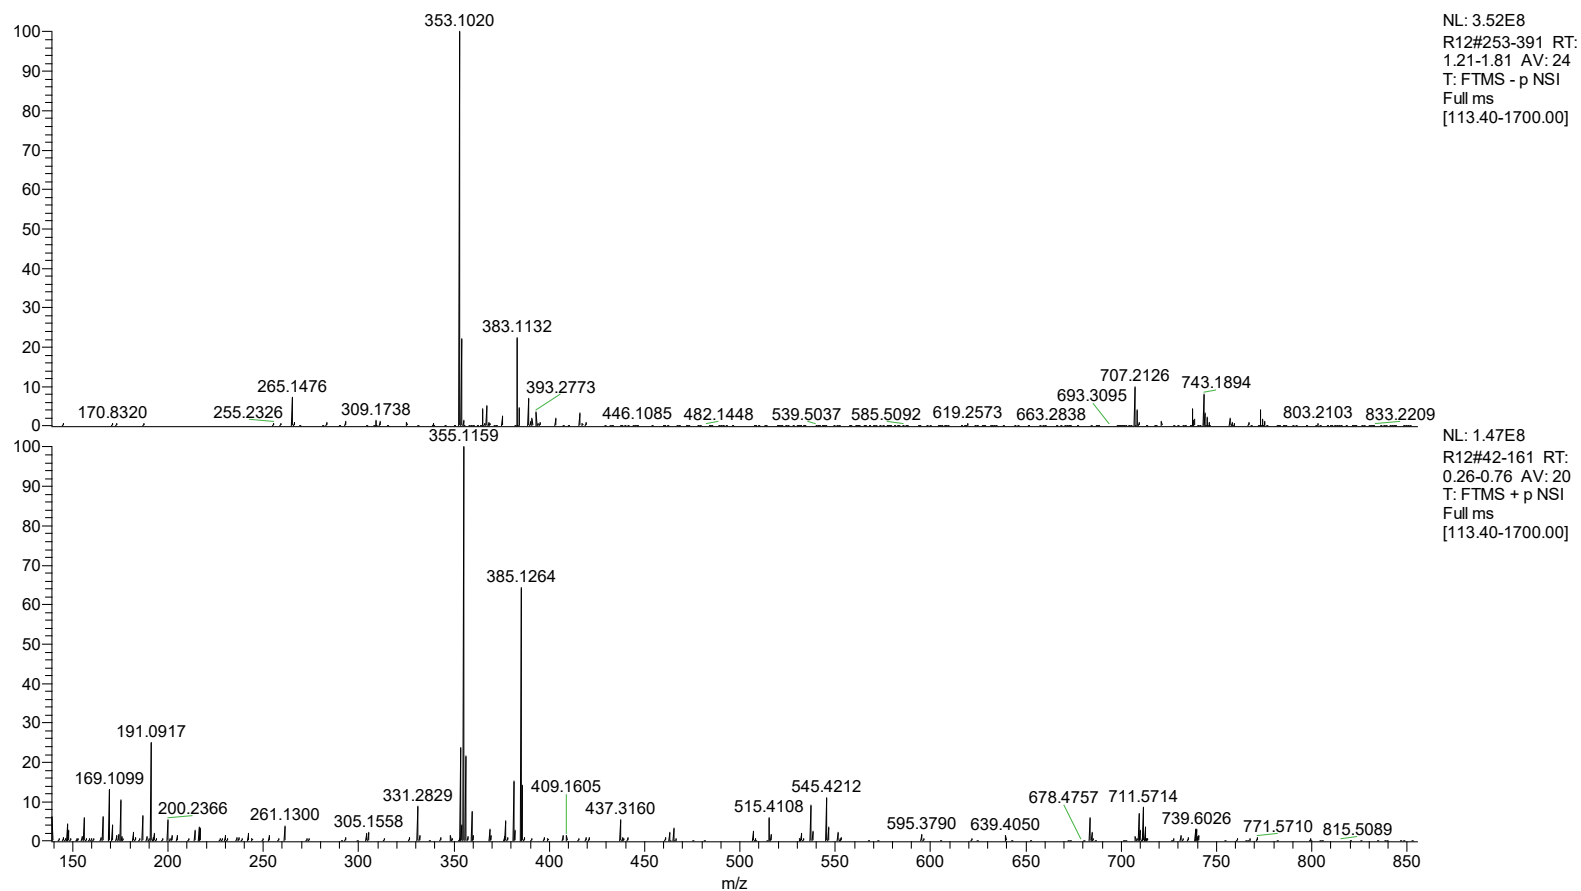

Fig. S17. HRMS of 3

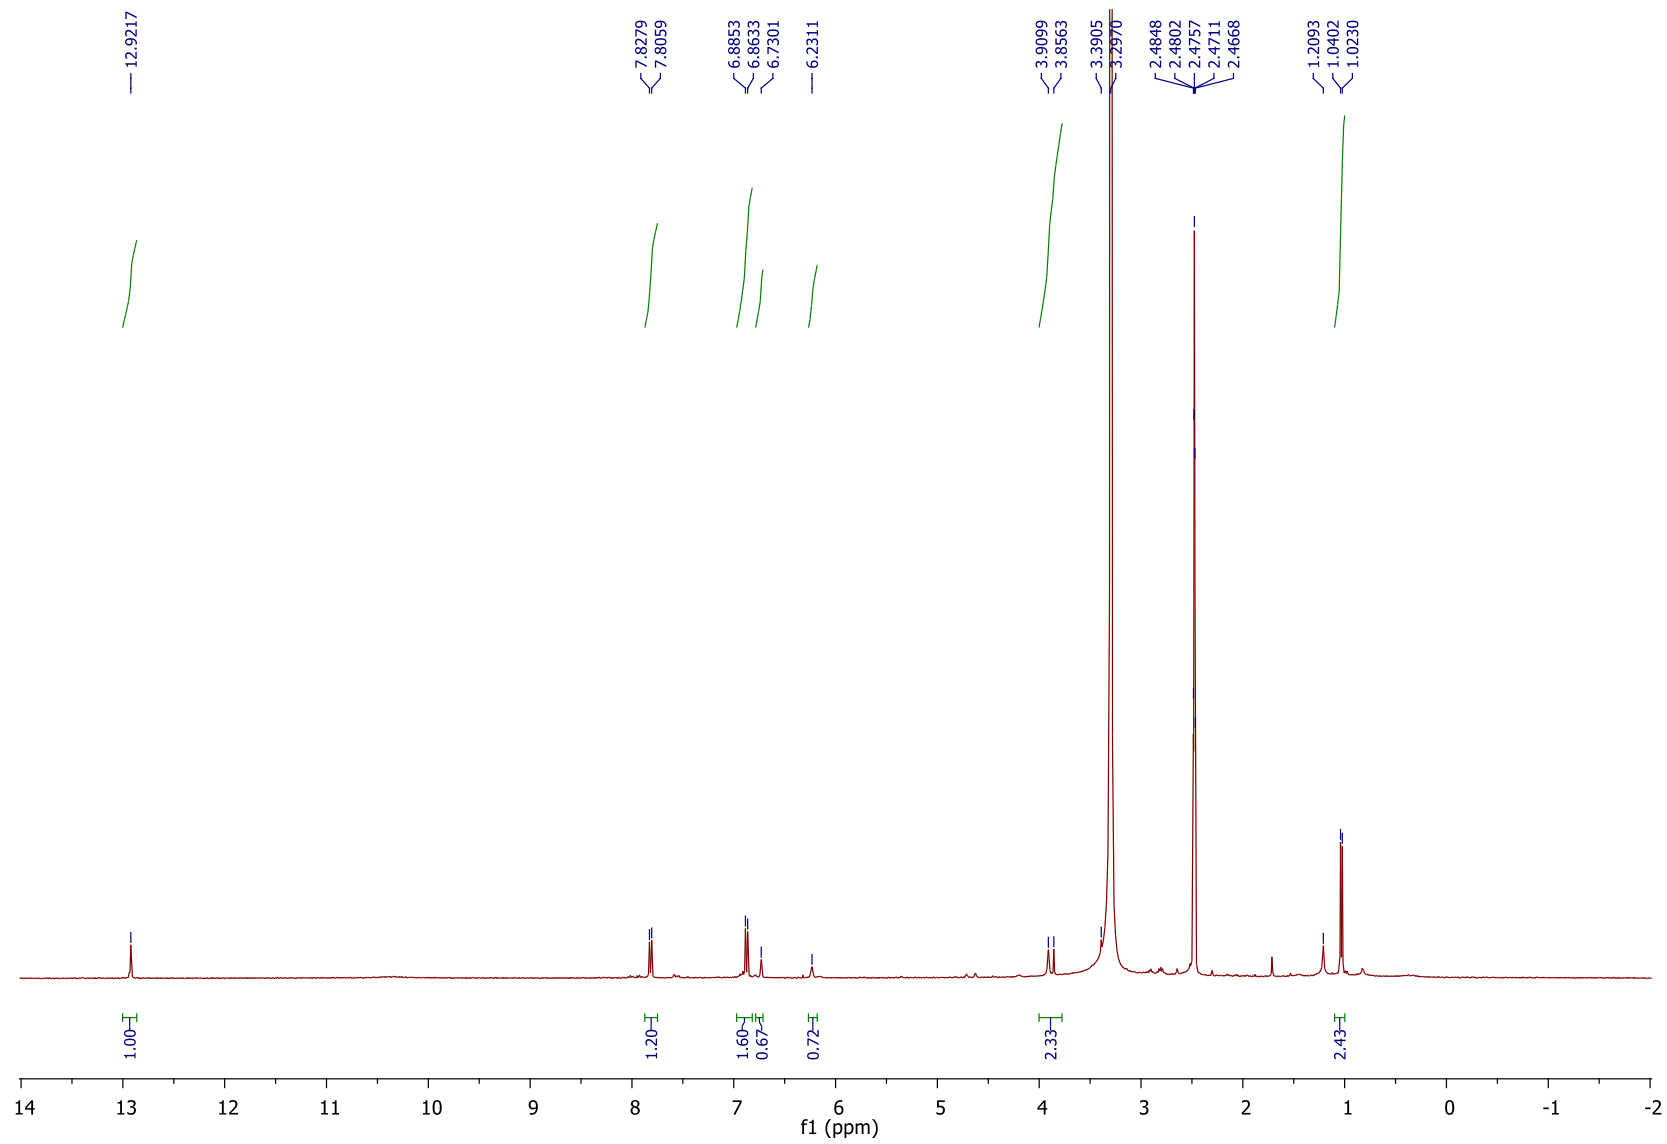

Fig. S18. <sup>1</sup>H NMR spectrum of **3**

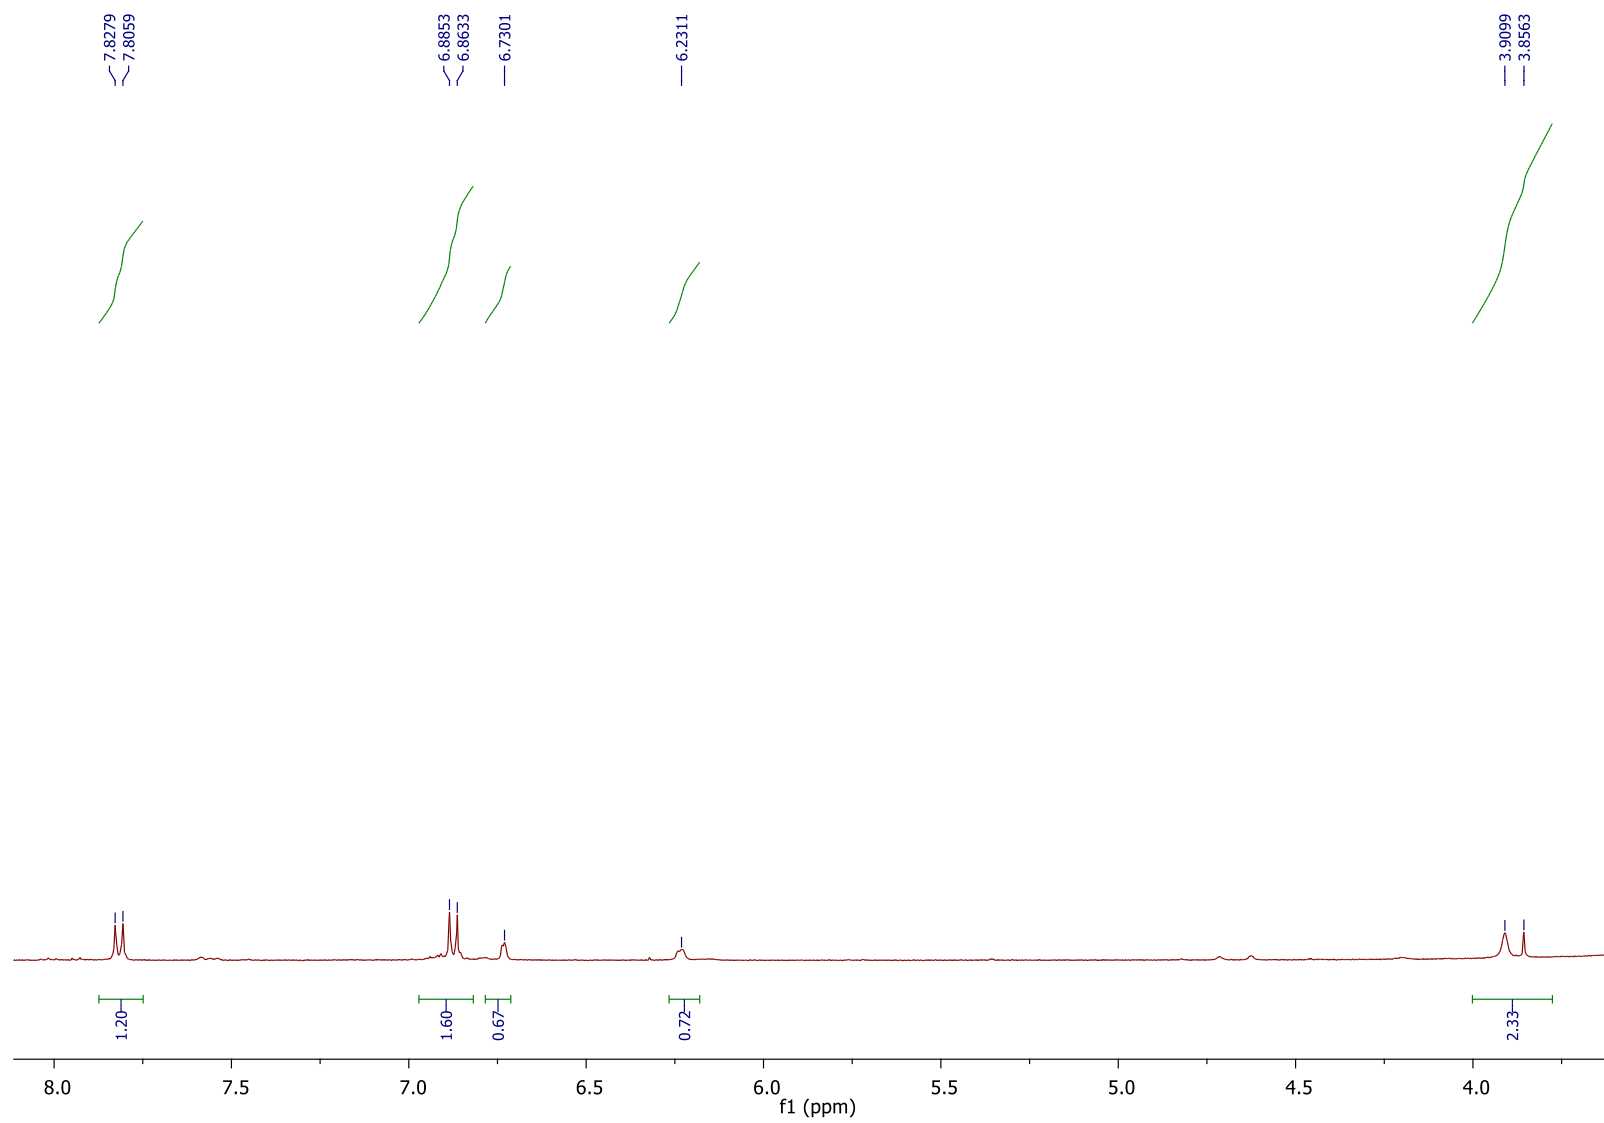

**Fig. S19.** Expansion of  $^1\text{H}$  NMR spectrum of **3**



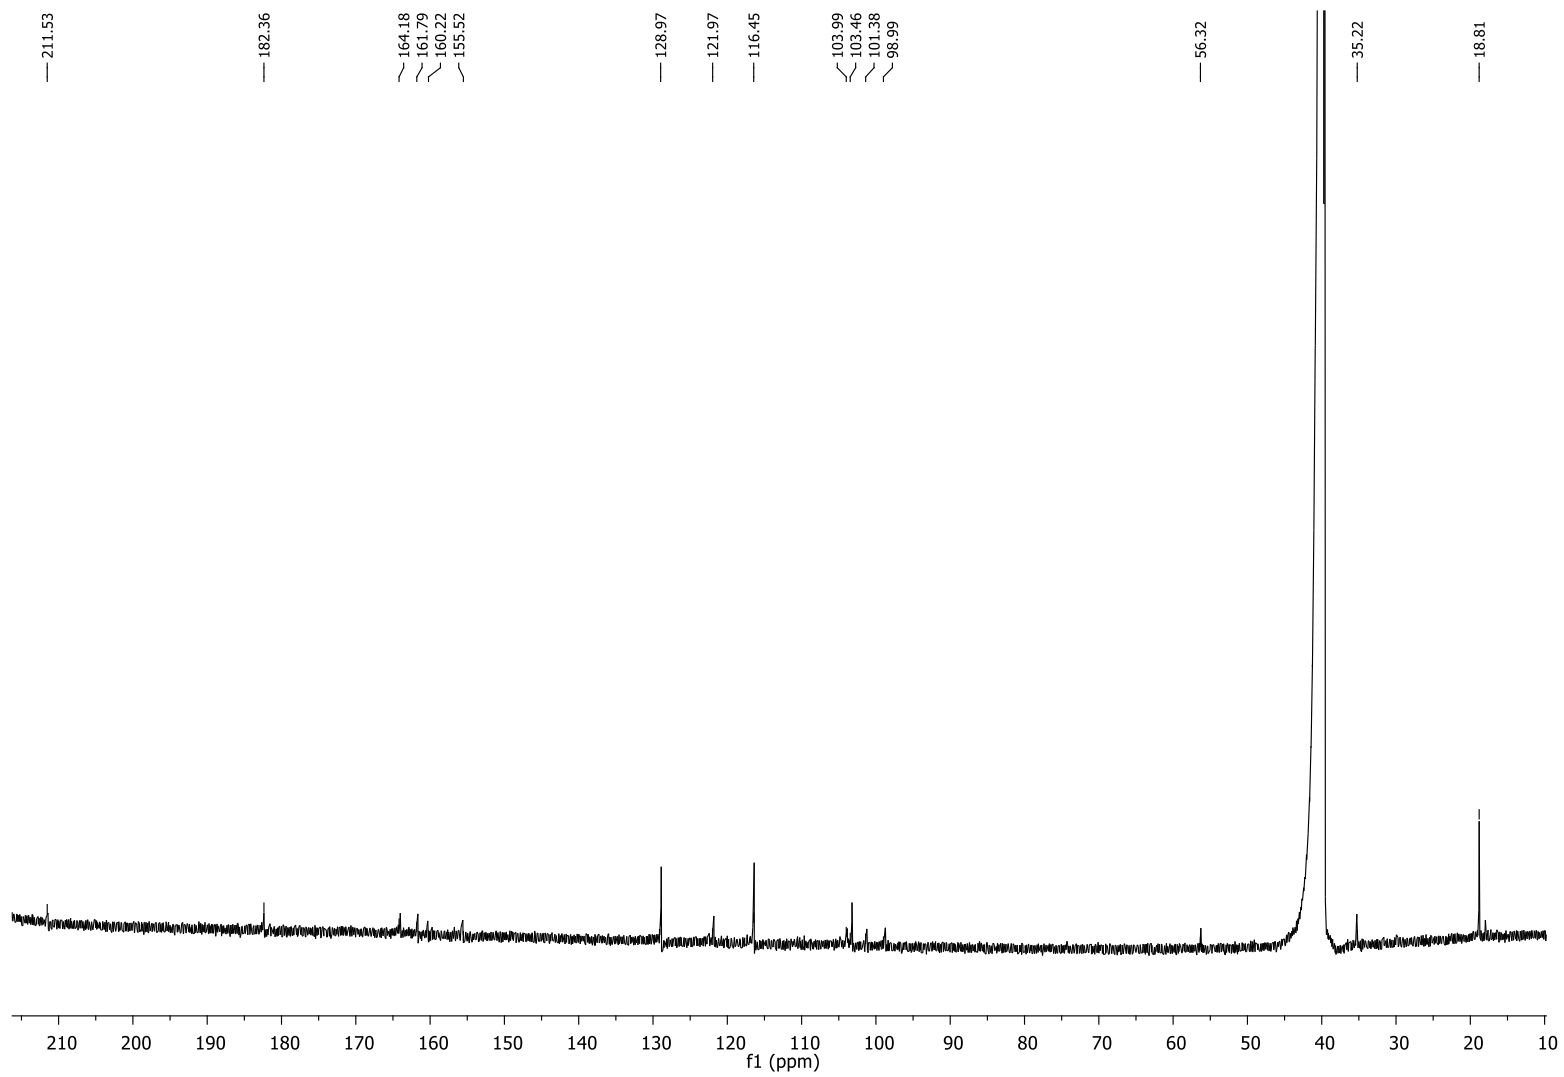

Fig. S20.  $^{13}\text{C}$  NMR spectrum of **3**

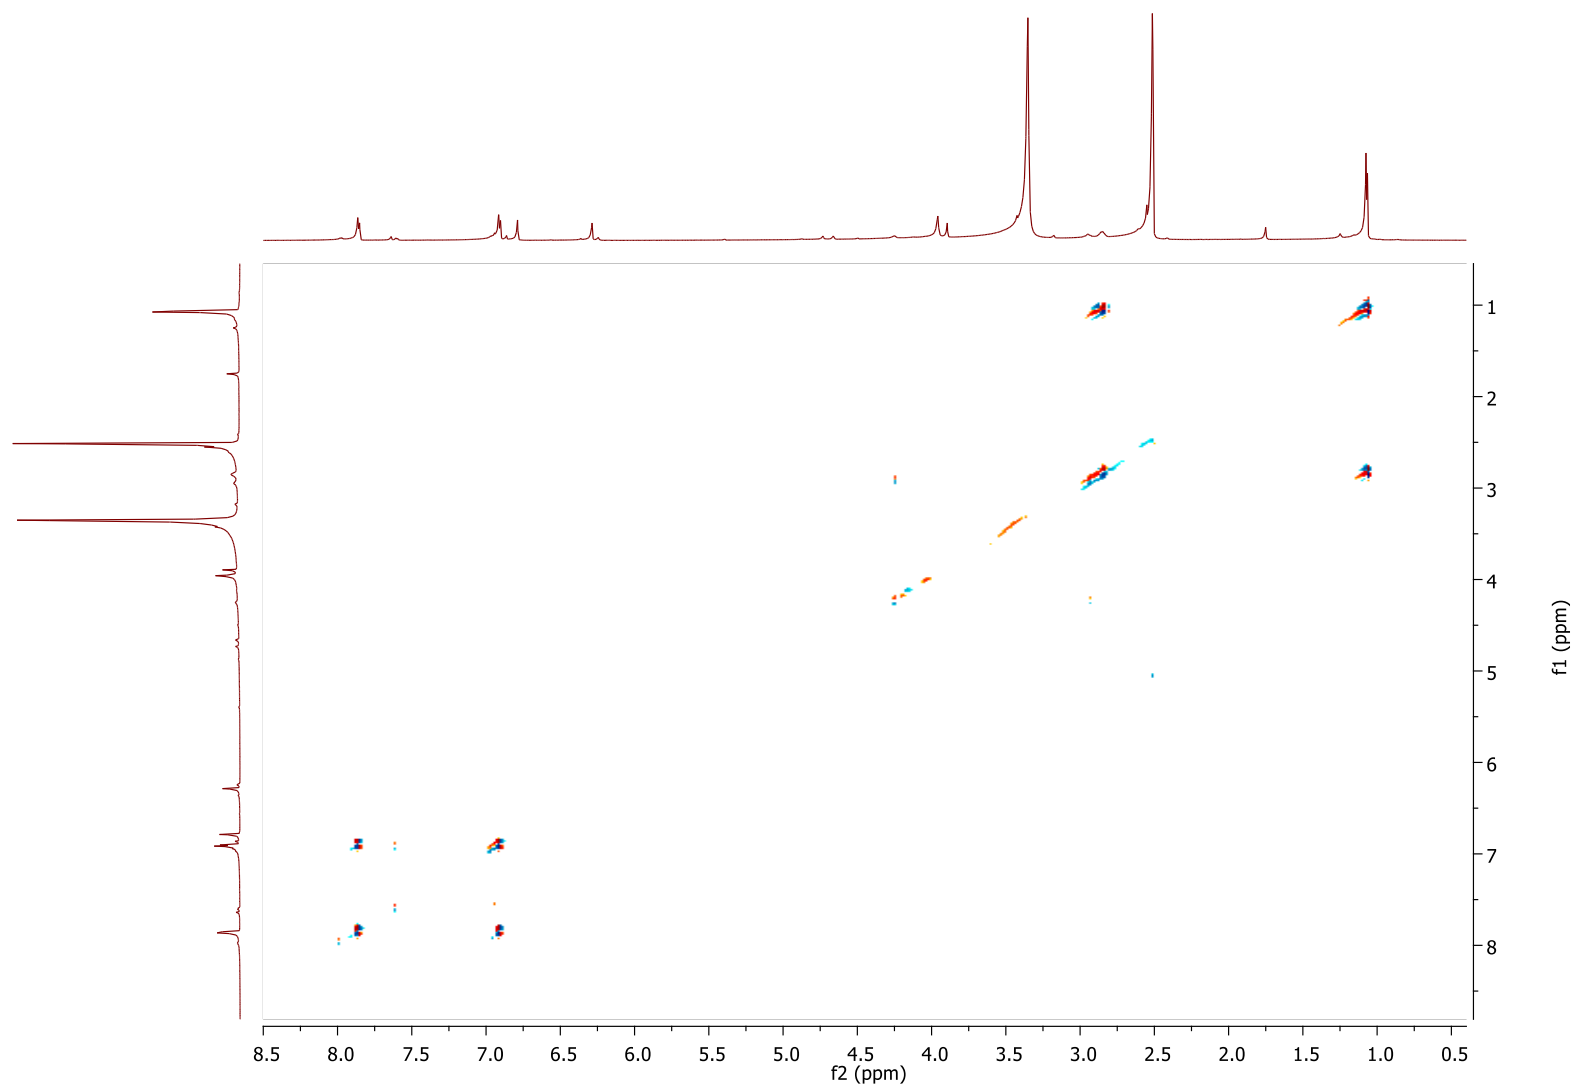

**Fig. S21.** COSY spectrum of **3**

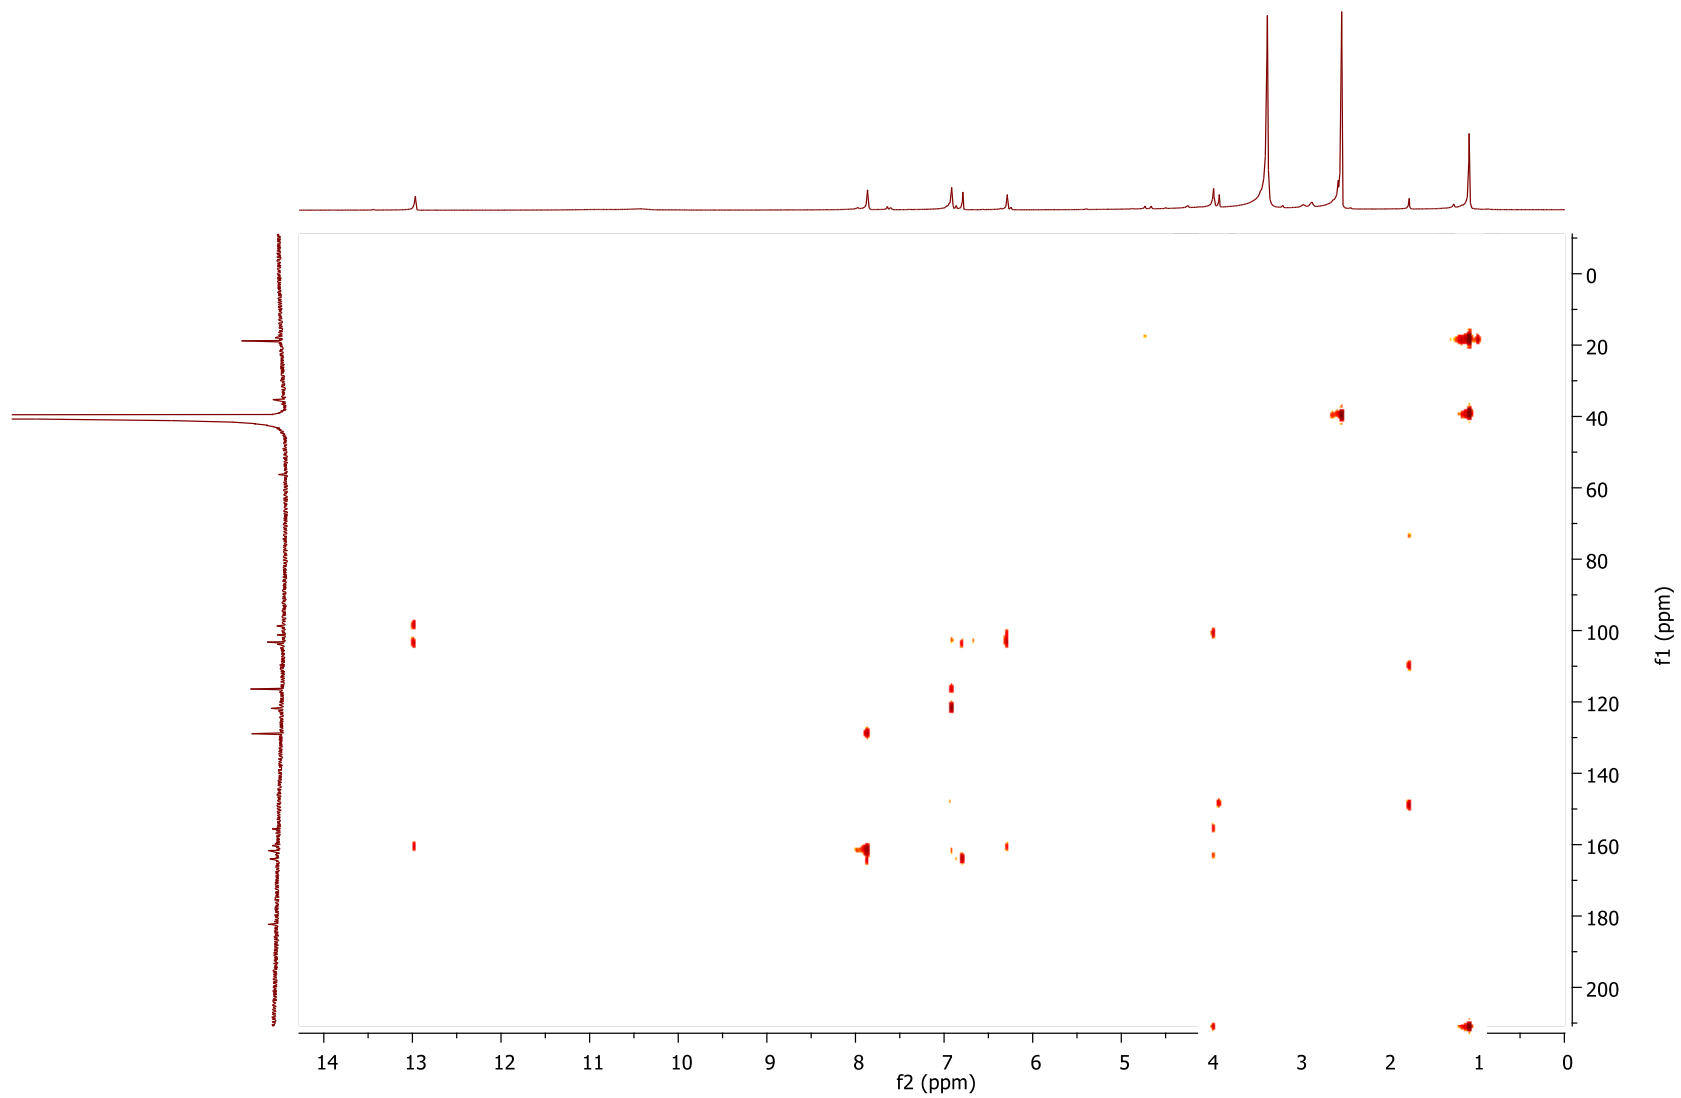

Fig. S22. HMBC spectrum of 3

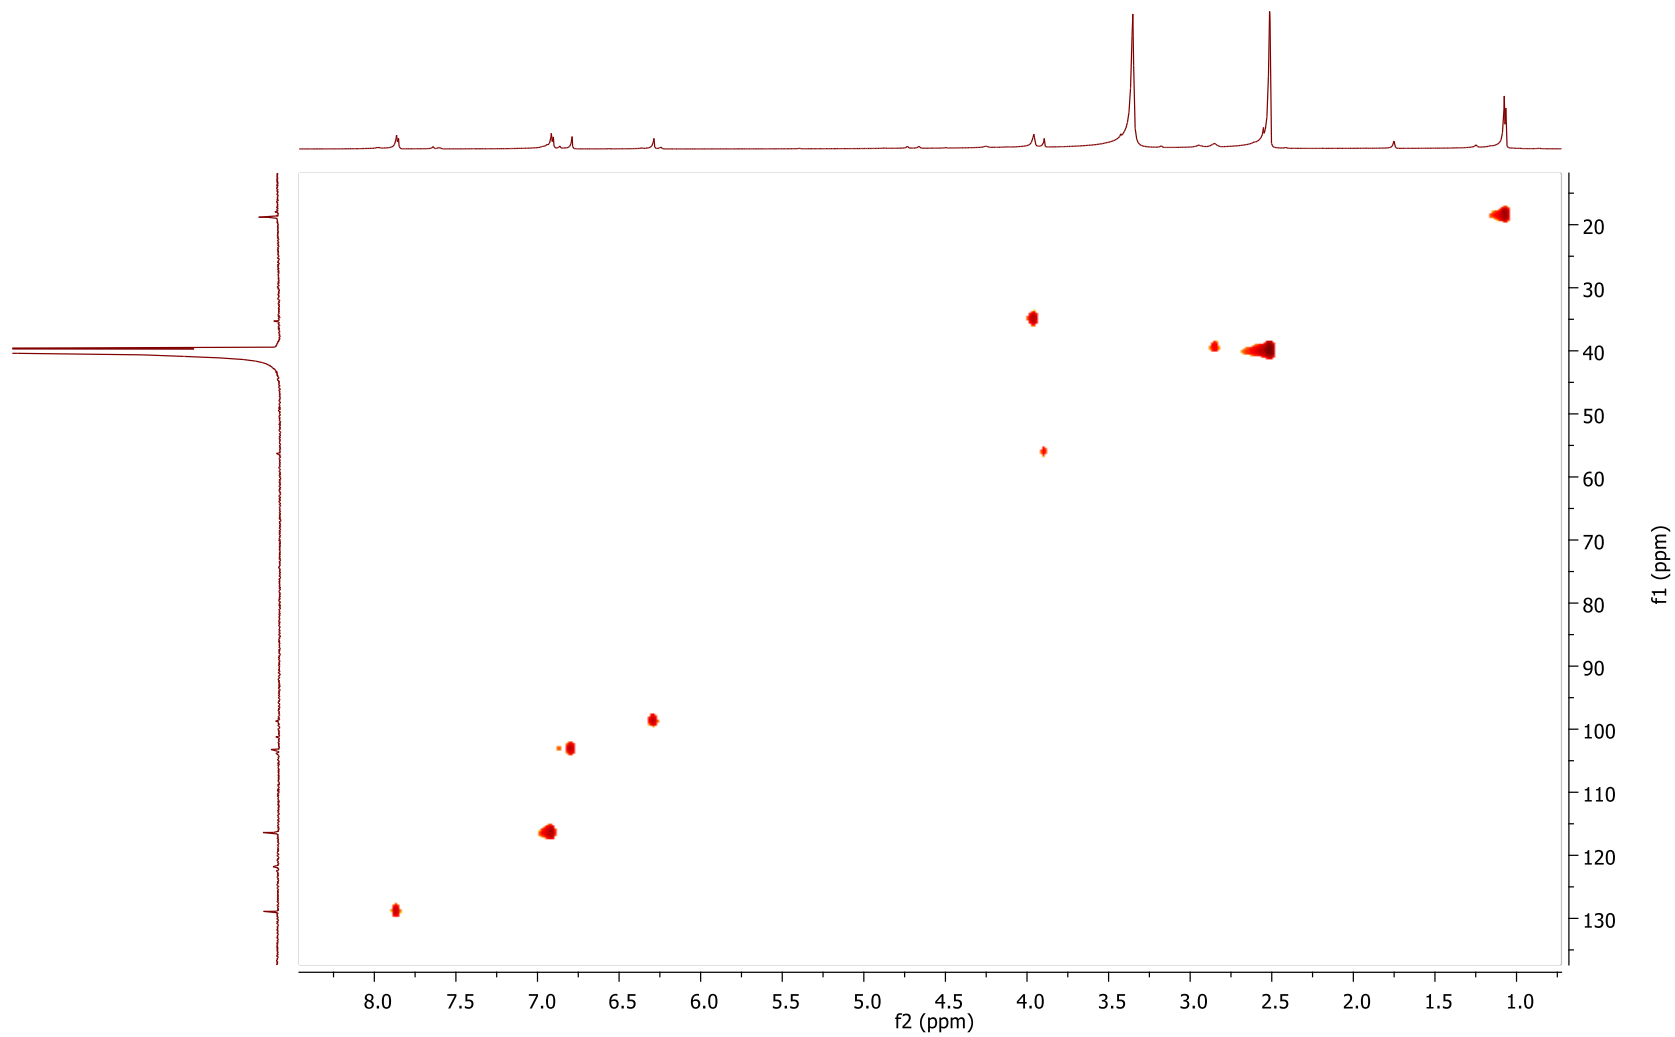

**Fig. S23.** HSQC spectrum of **3**

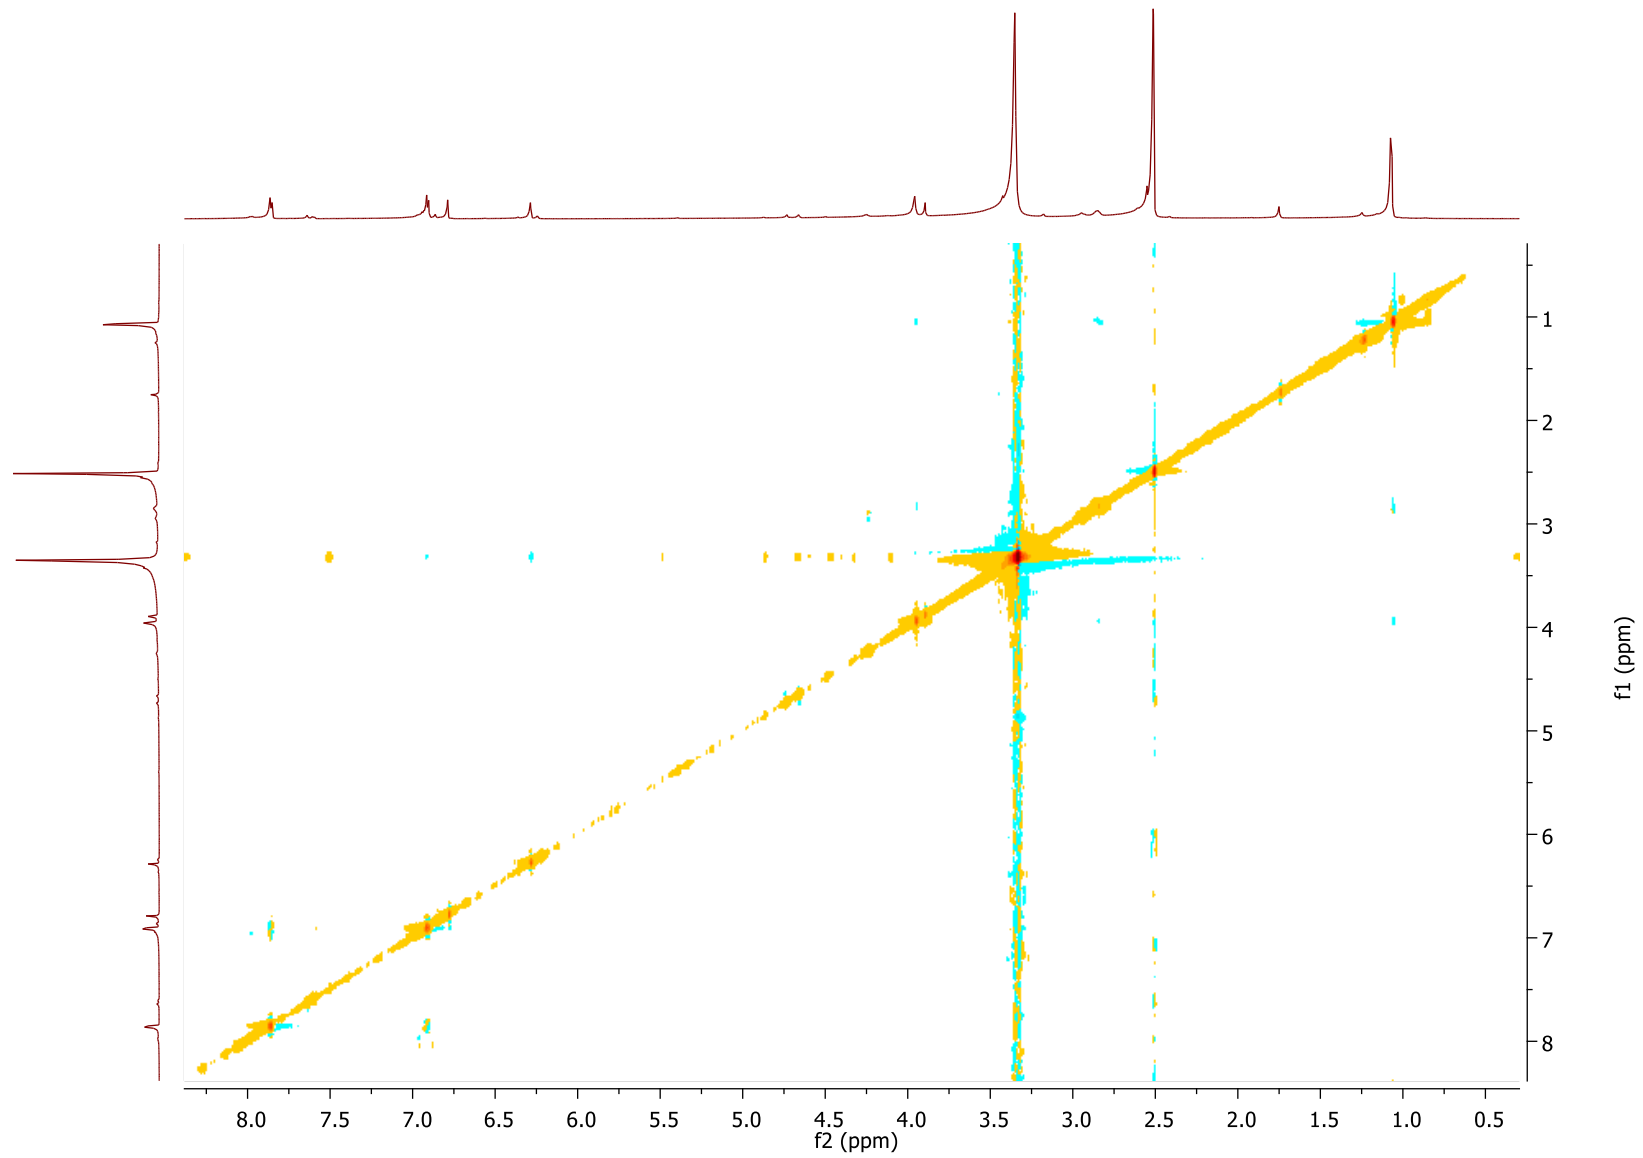

**Fig. S24.** NOESY spectrum of **3**

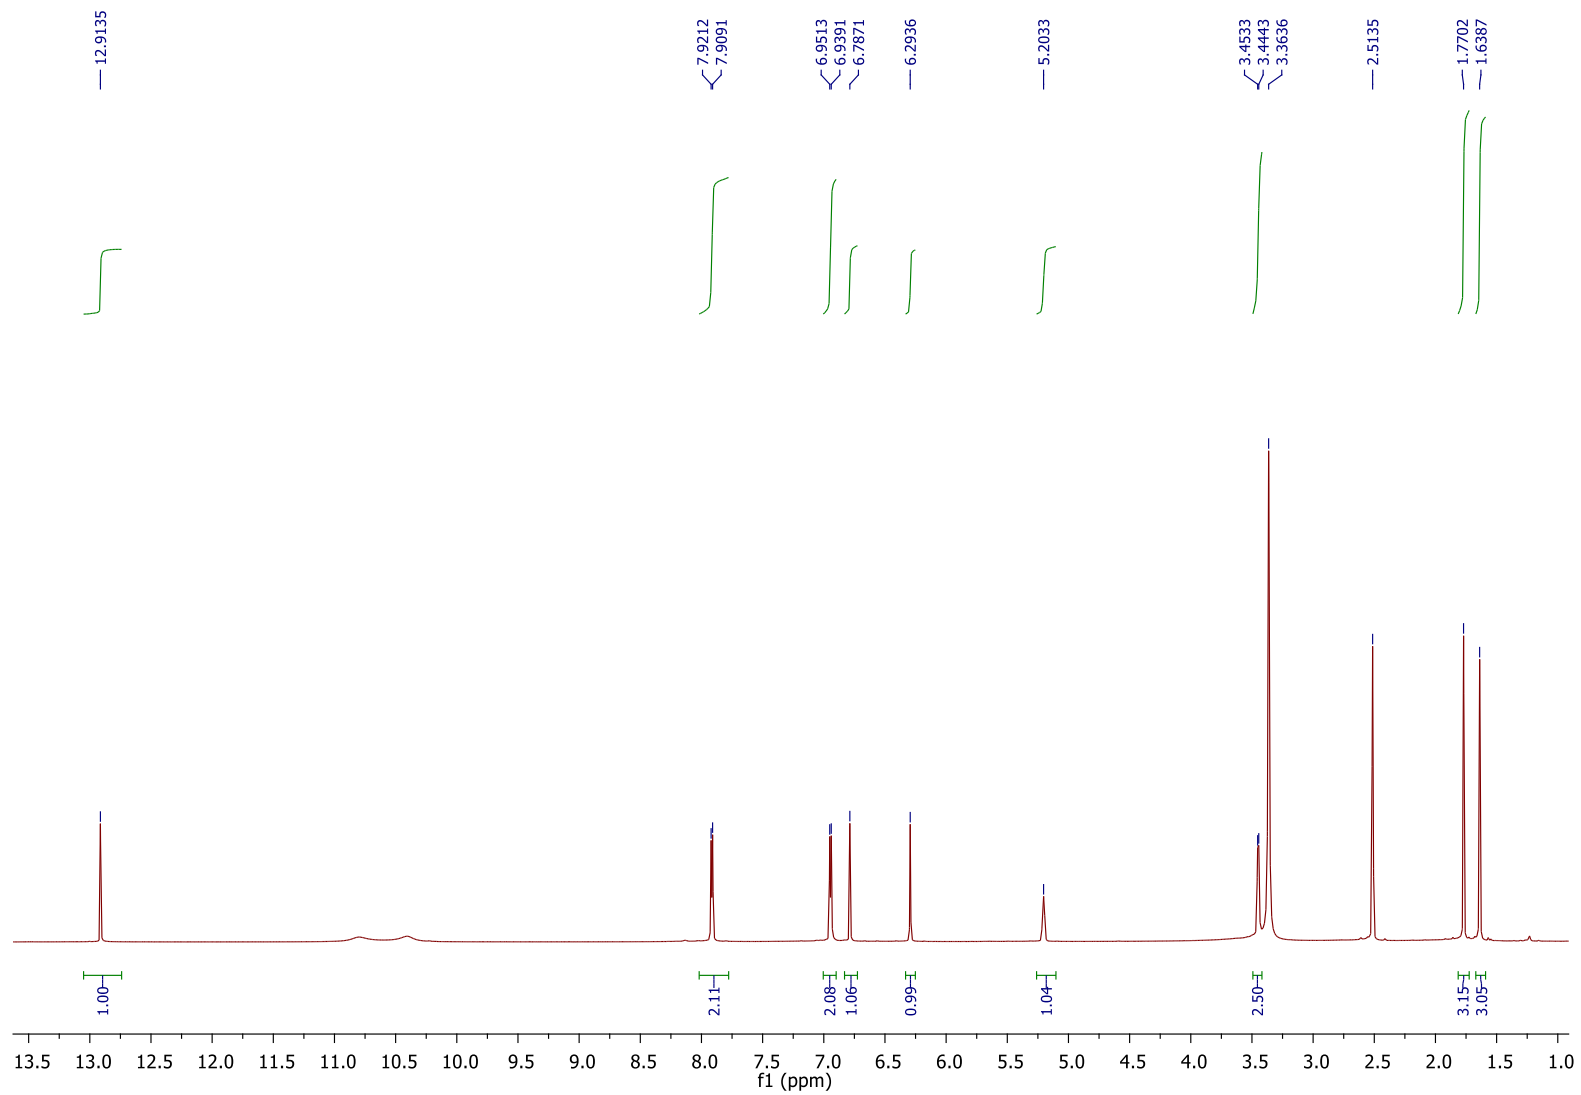

Fig. S25.  $^1\text{H}$  NMR spectrum of 4

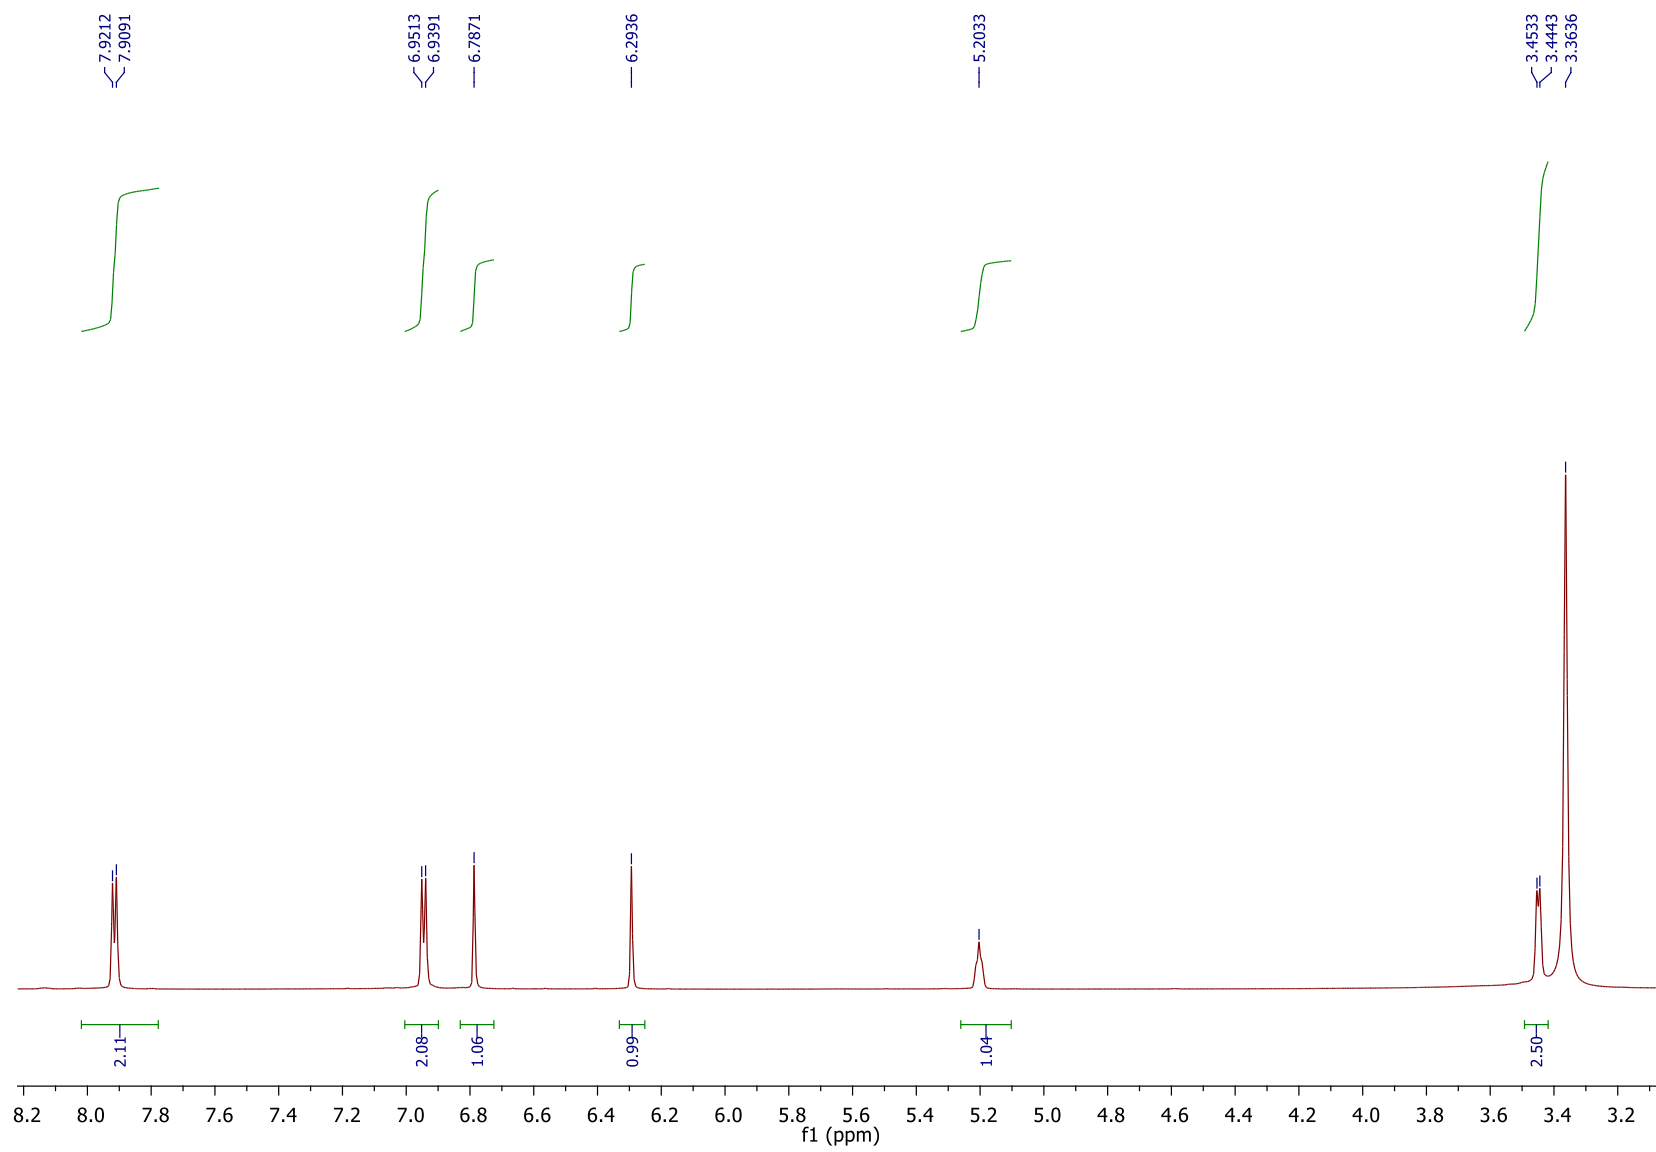

**Fig. S26.** Expansion of  $^1\text{H}$  NMR spectrum of **4**

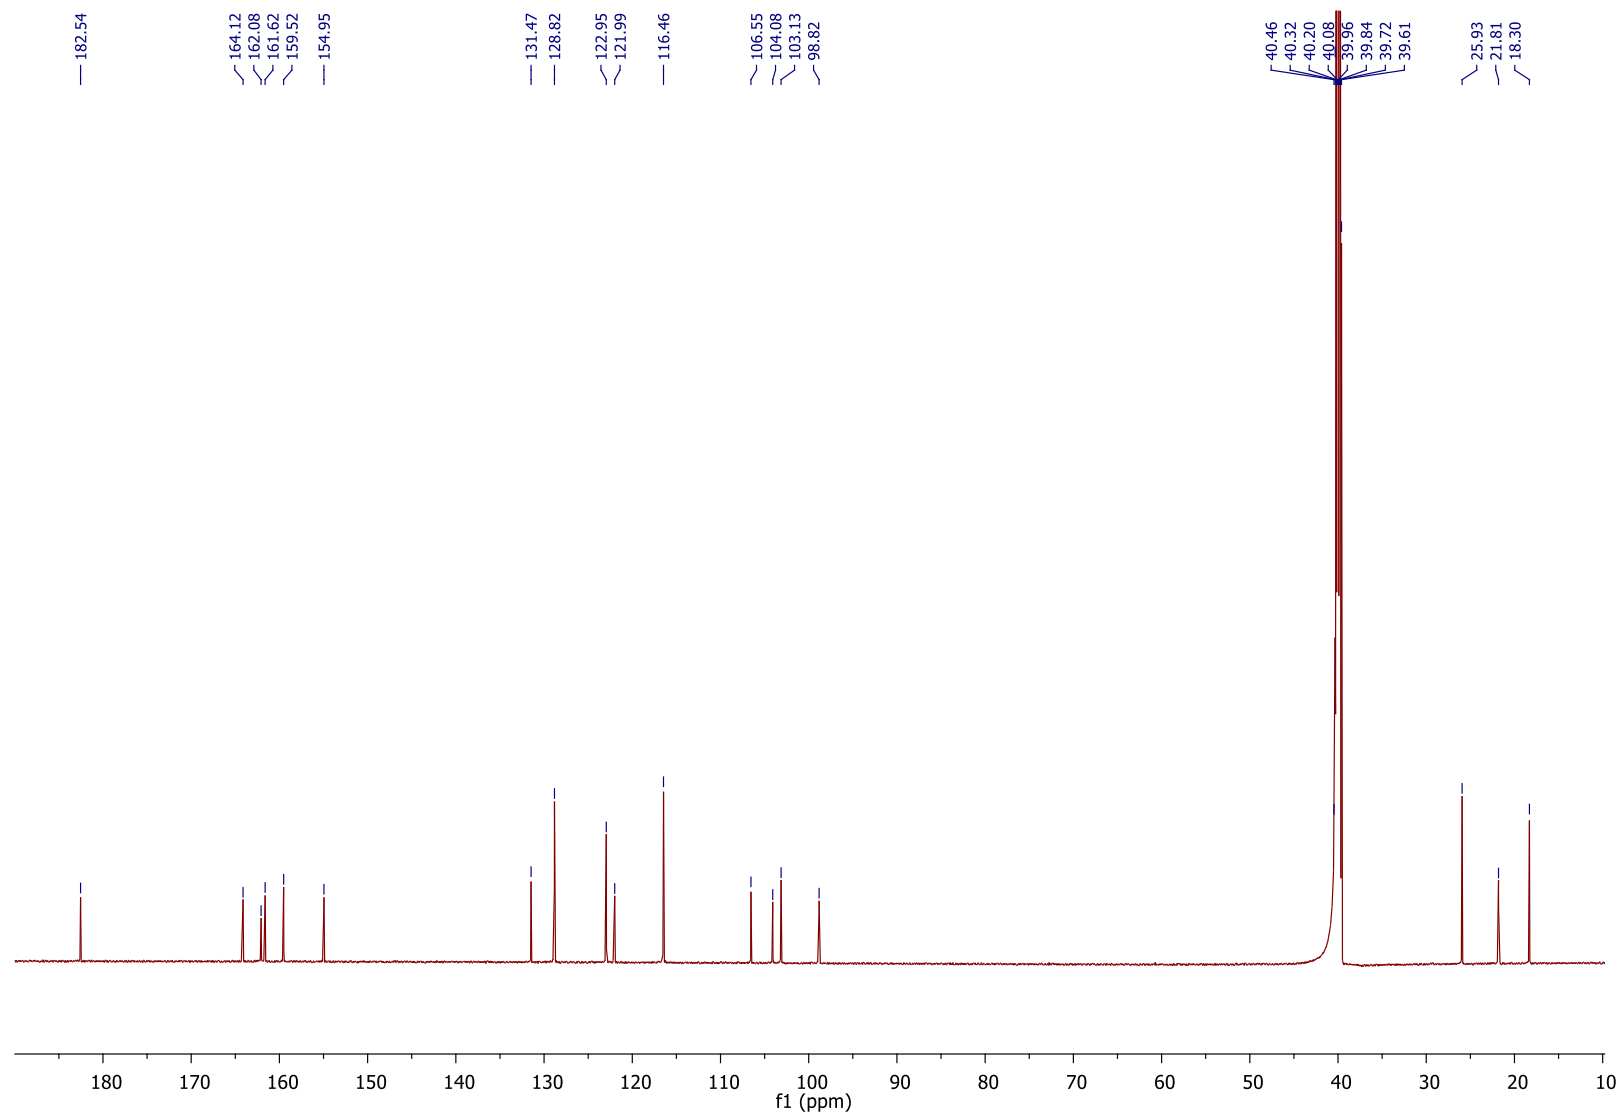

Fig. S27.  $^{13}\text{C}$  NMR spectrum of **4**



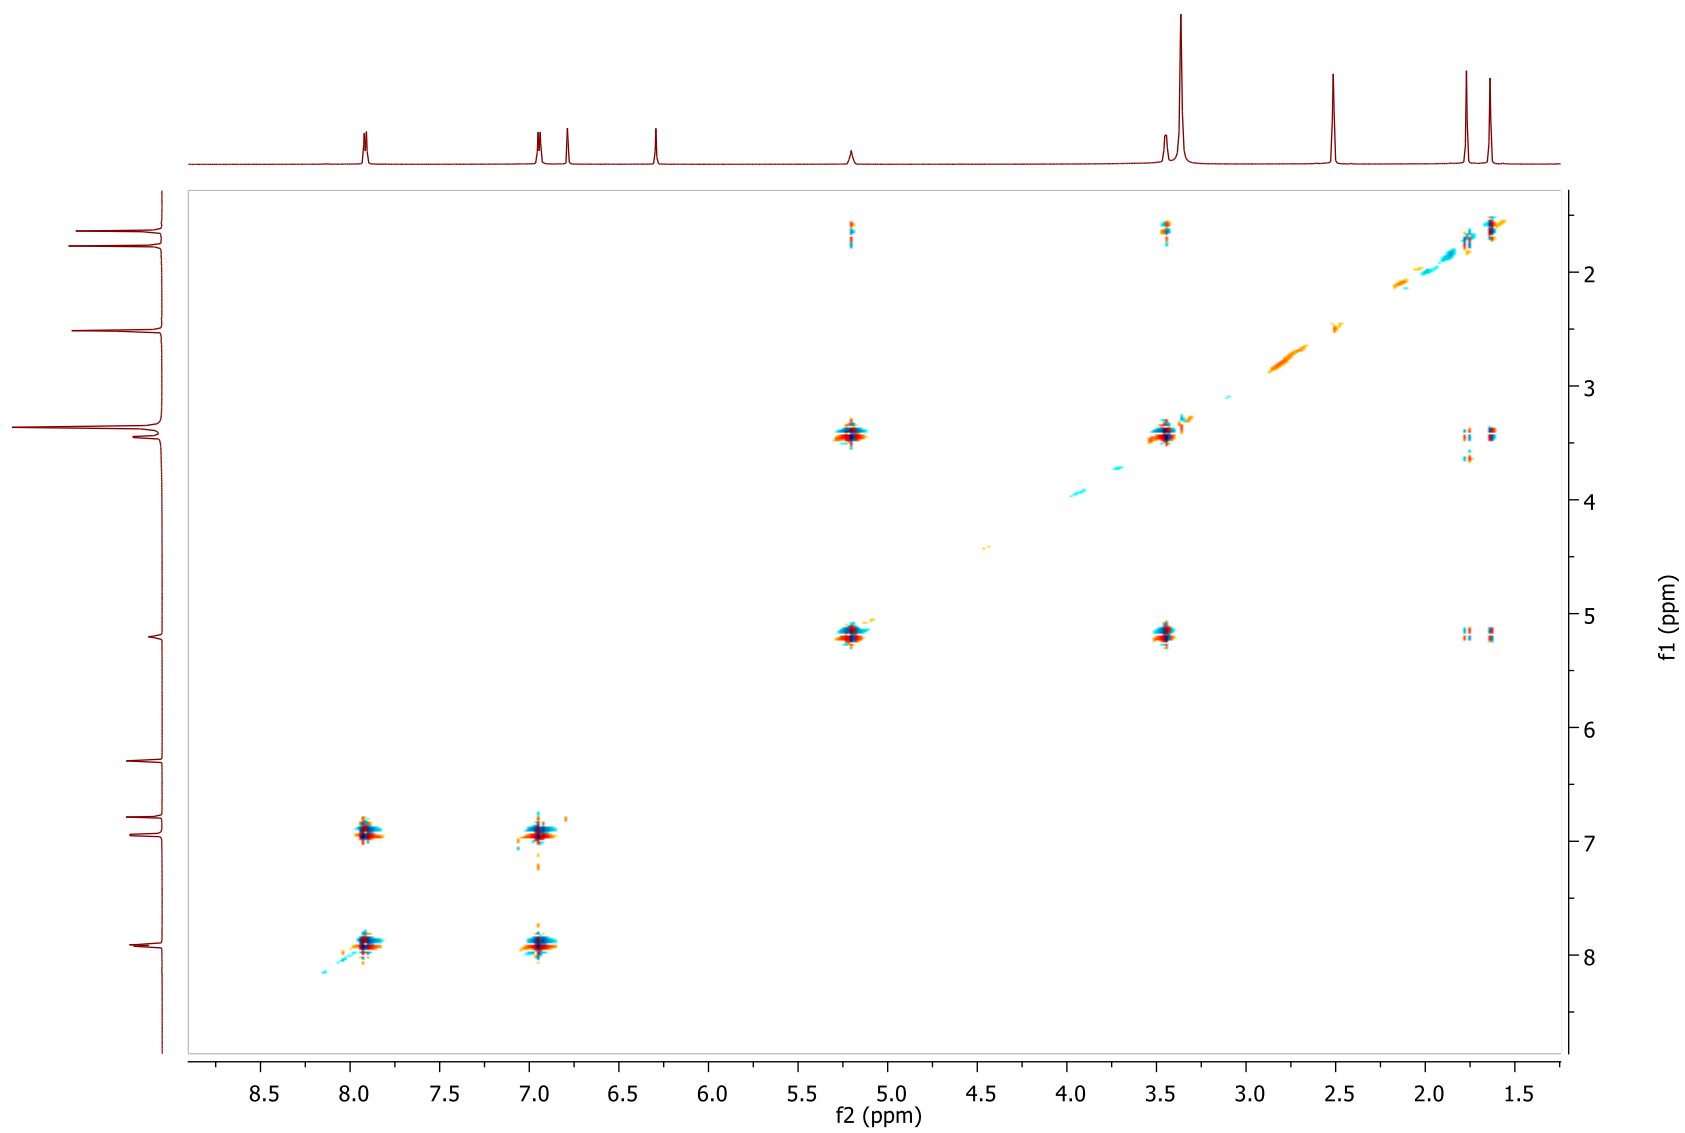

**Fig. S28.** COSY spectrum of **4**

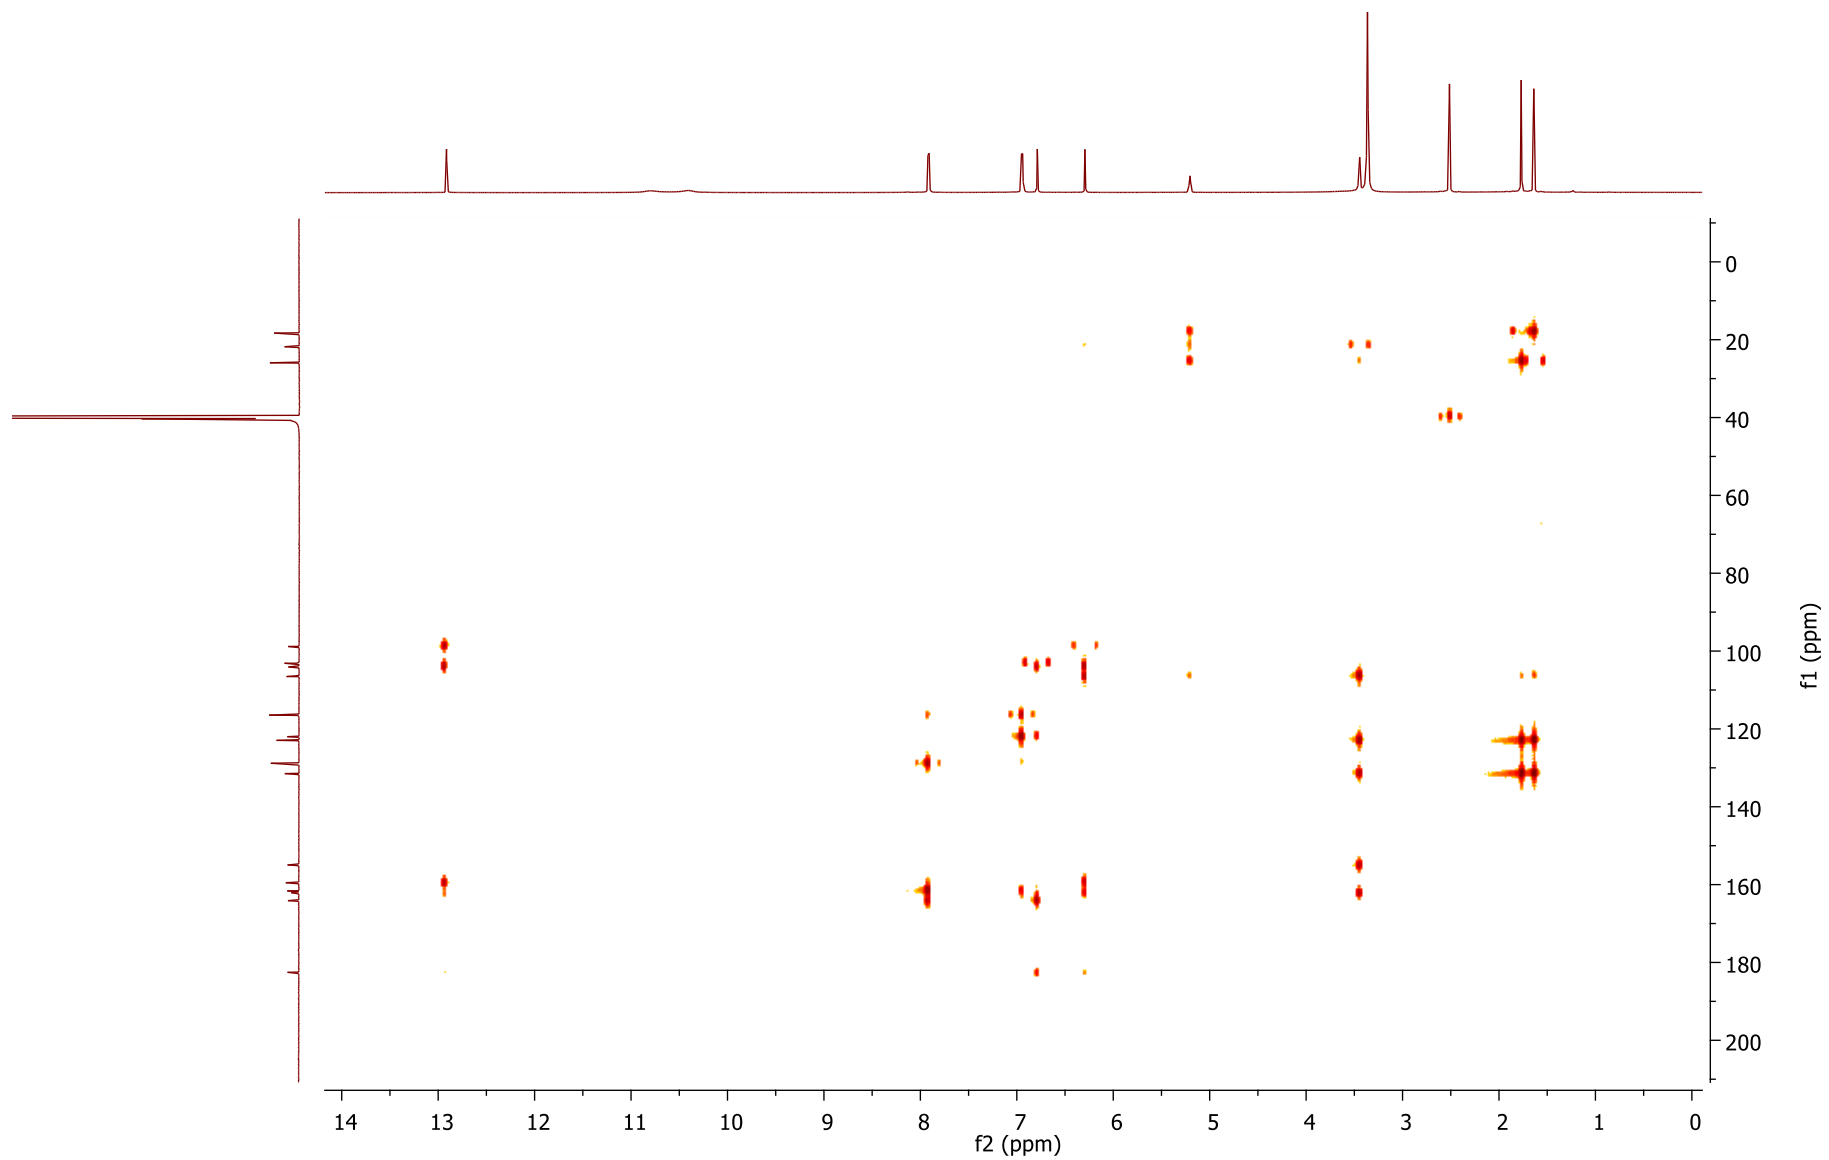

Fig. S29. HMBC spectrum of 4

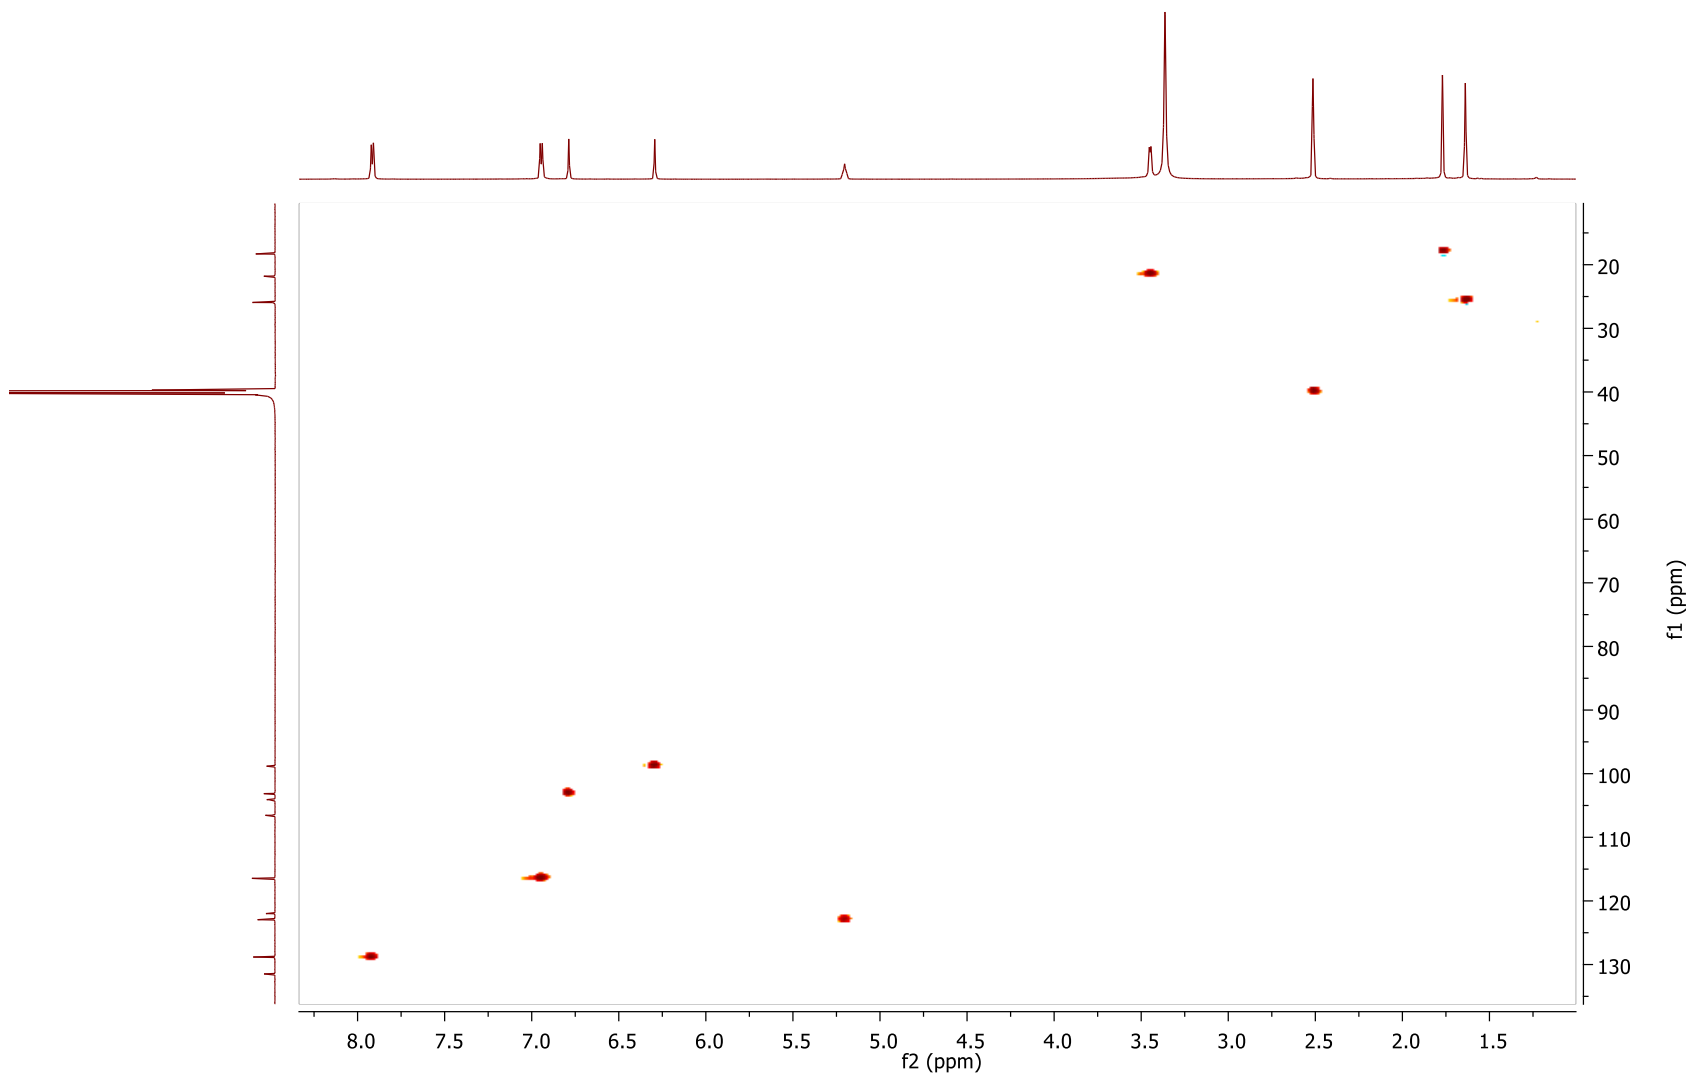

Fig. S30. HSQC spectrum of 4

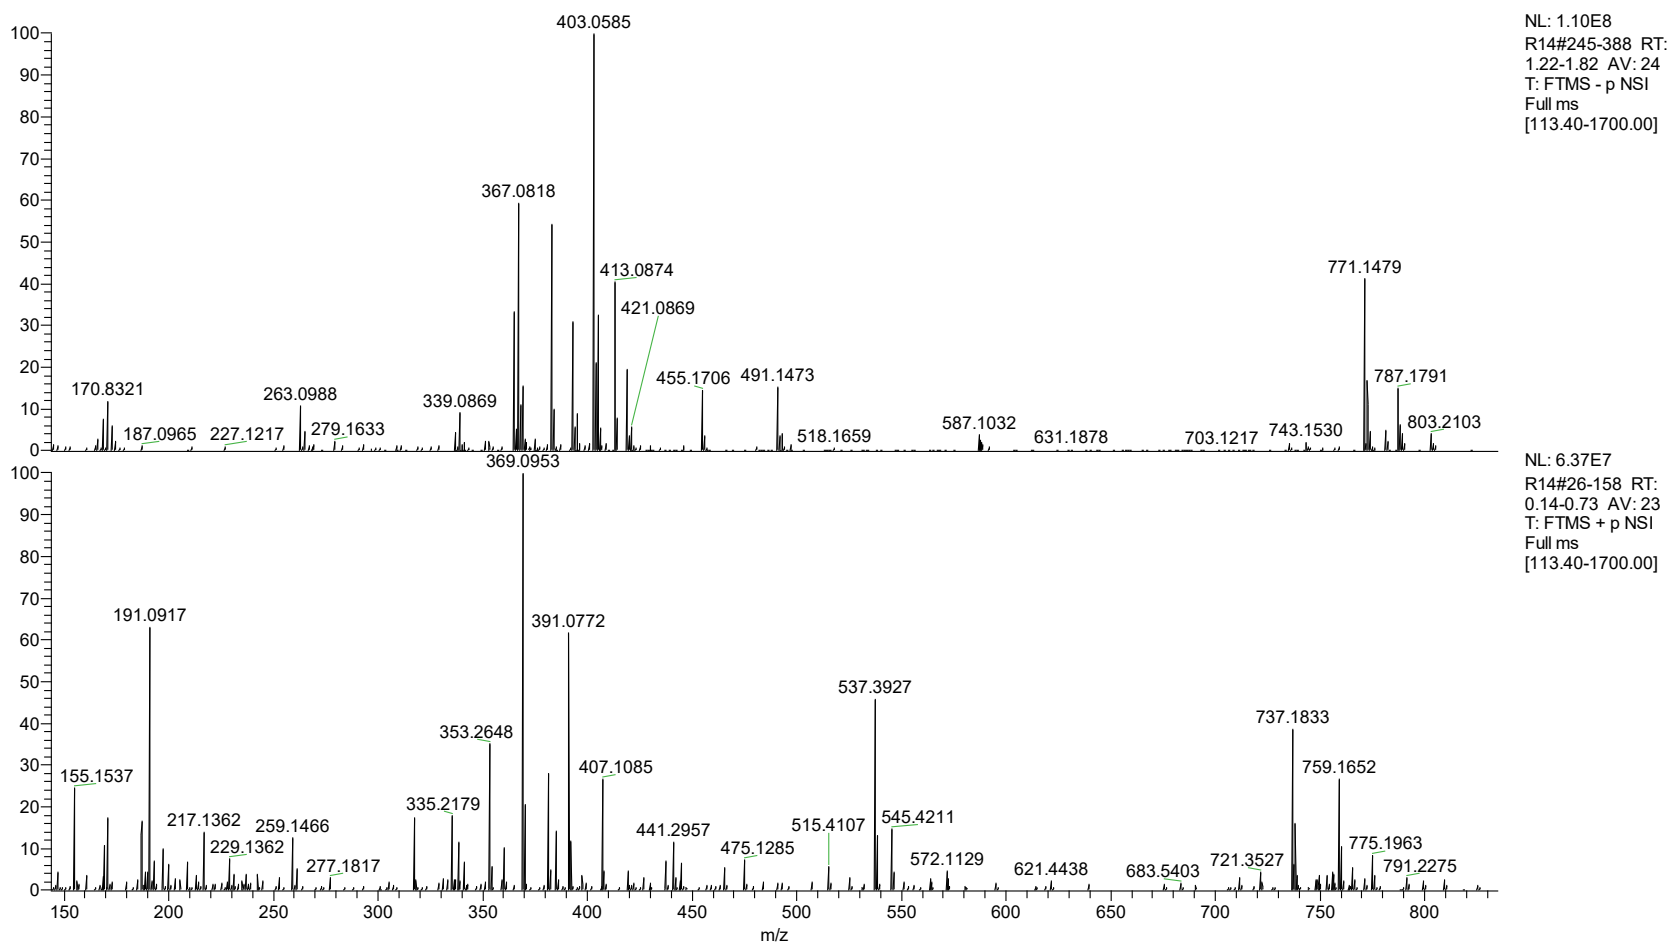

Fig. S31. HRMS of 5

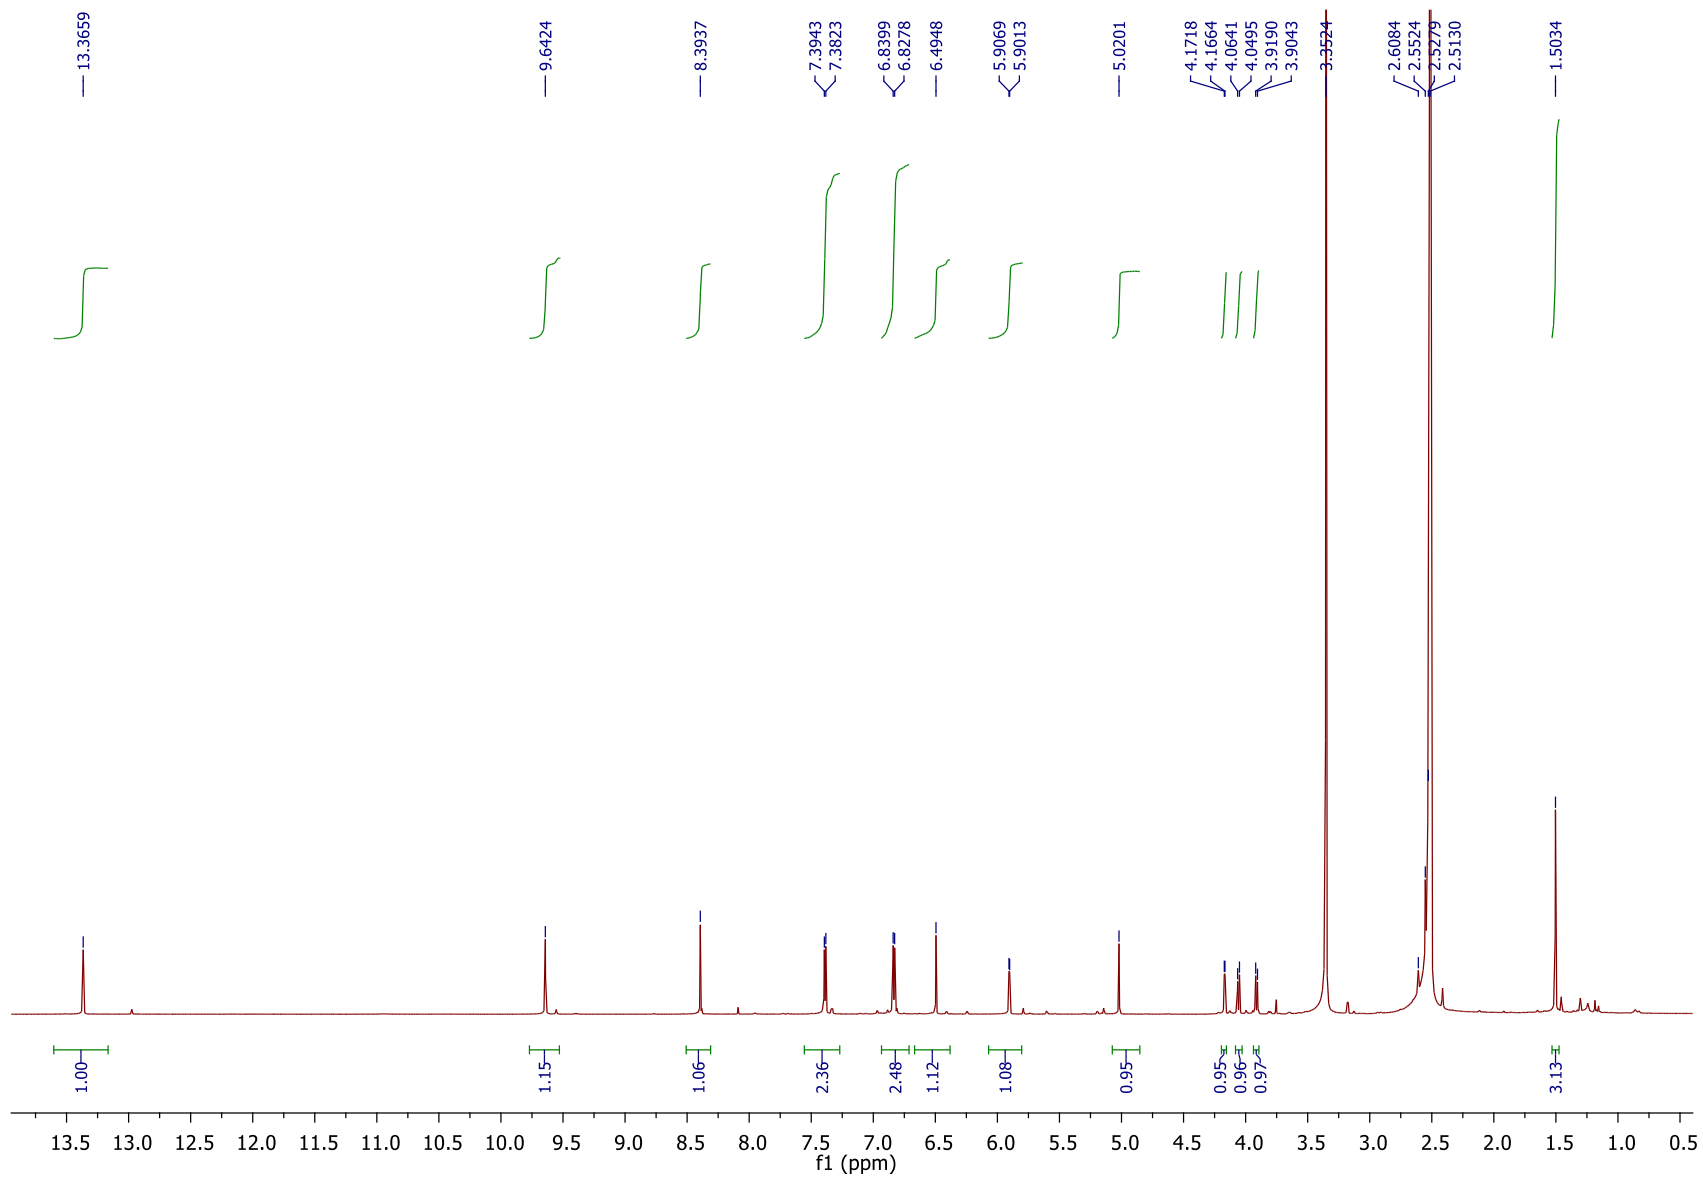

Fig. S32.  $^1\text{H}$  NMR spectrum of 5

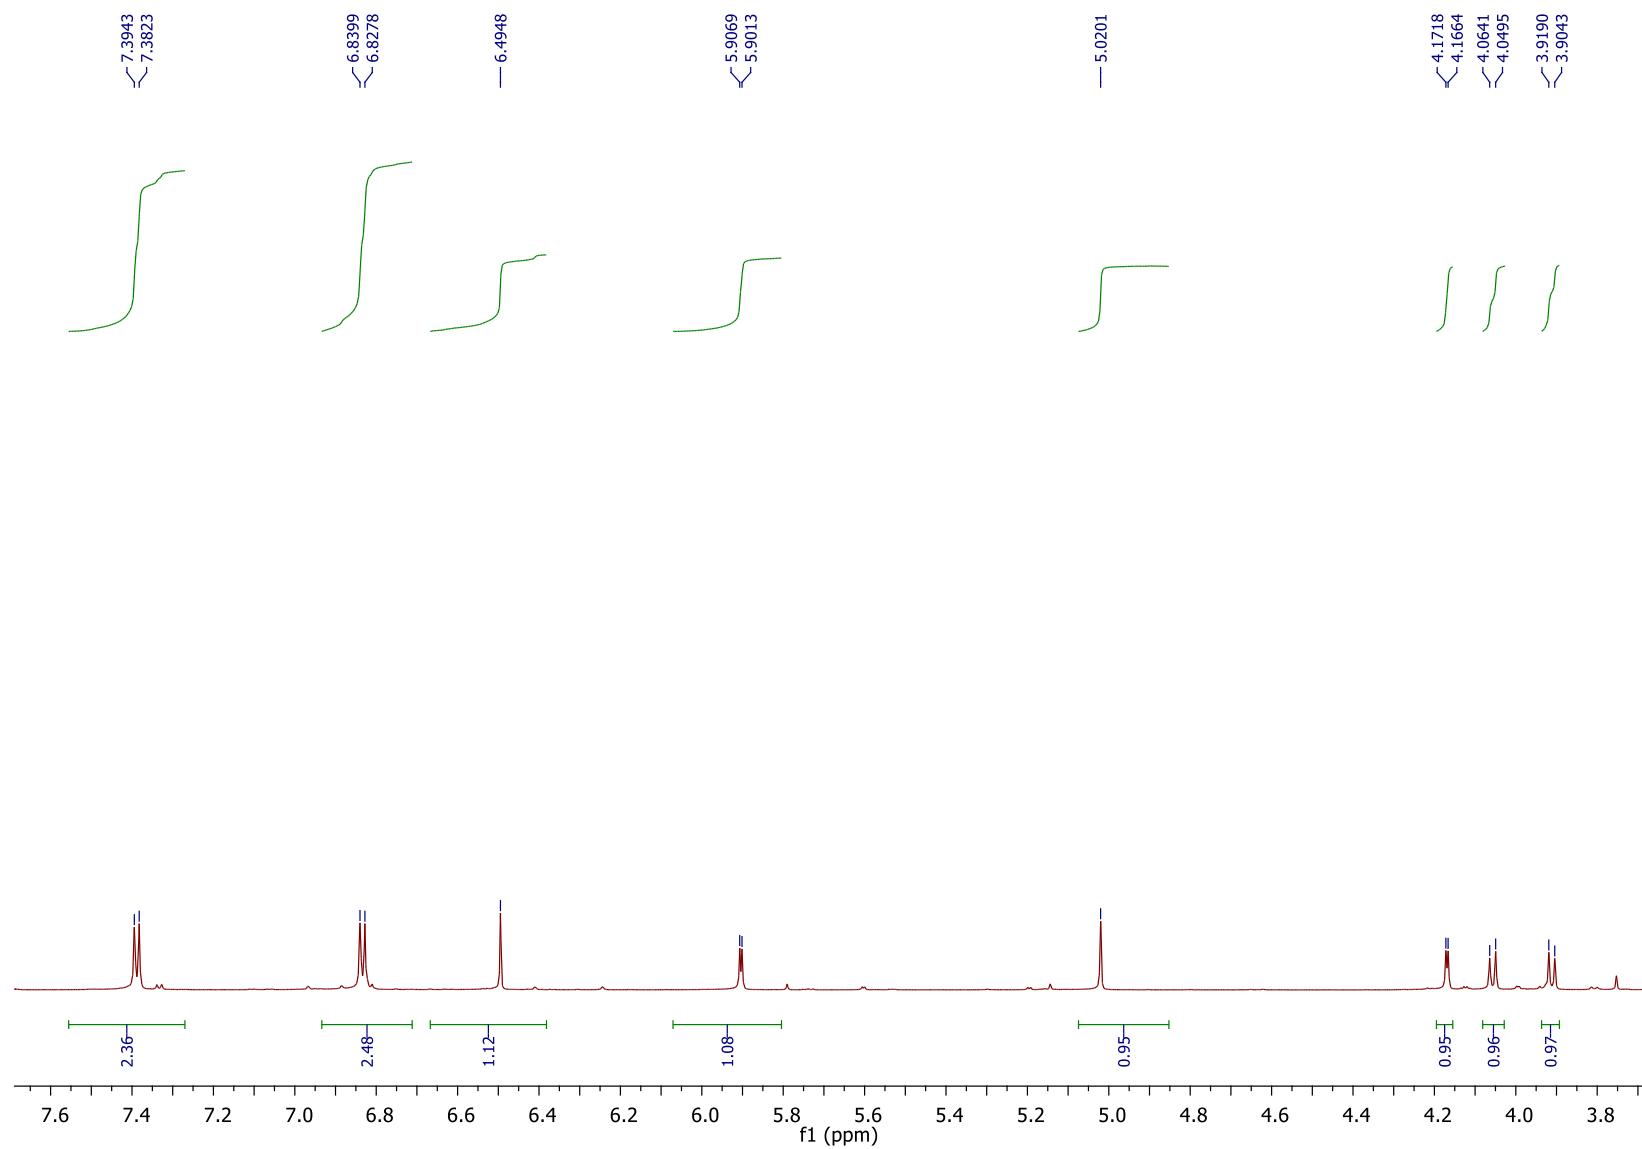

**Fig. S33.** Expansion of  $^1\text{H-NMR}$  spectrum of **5**

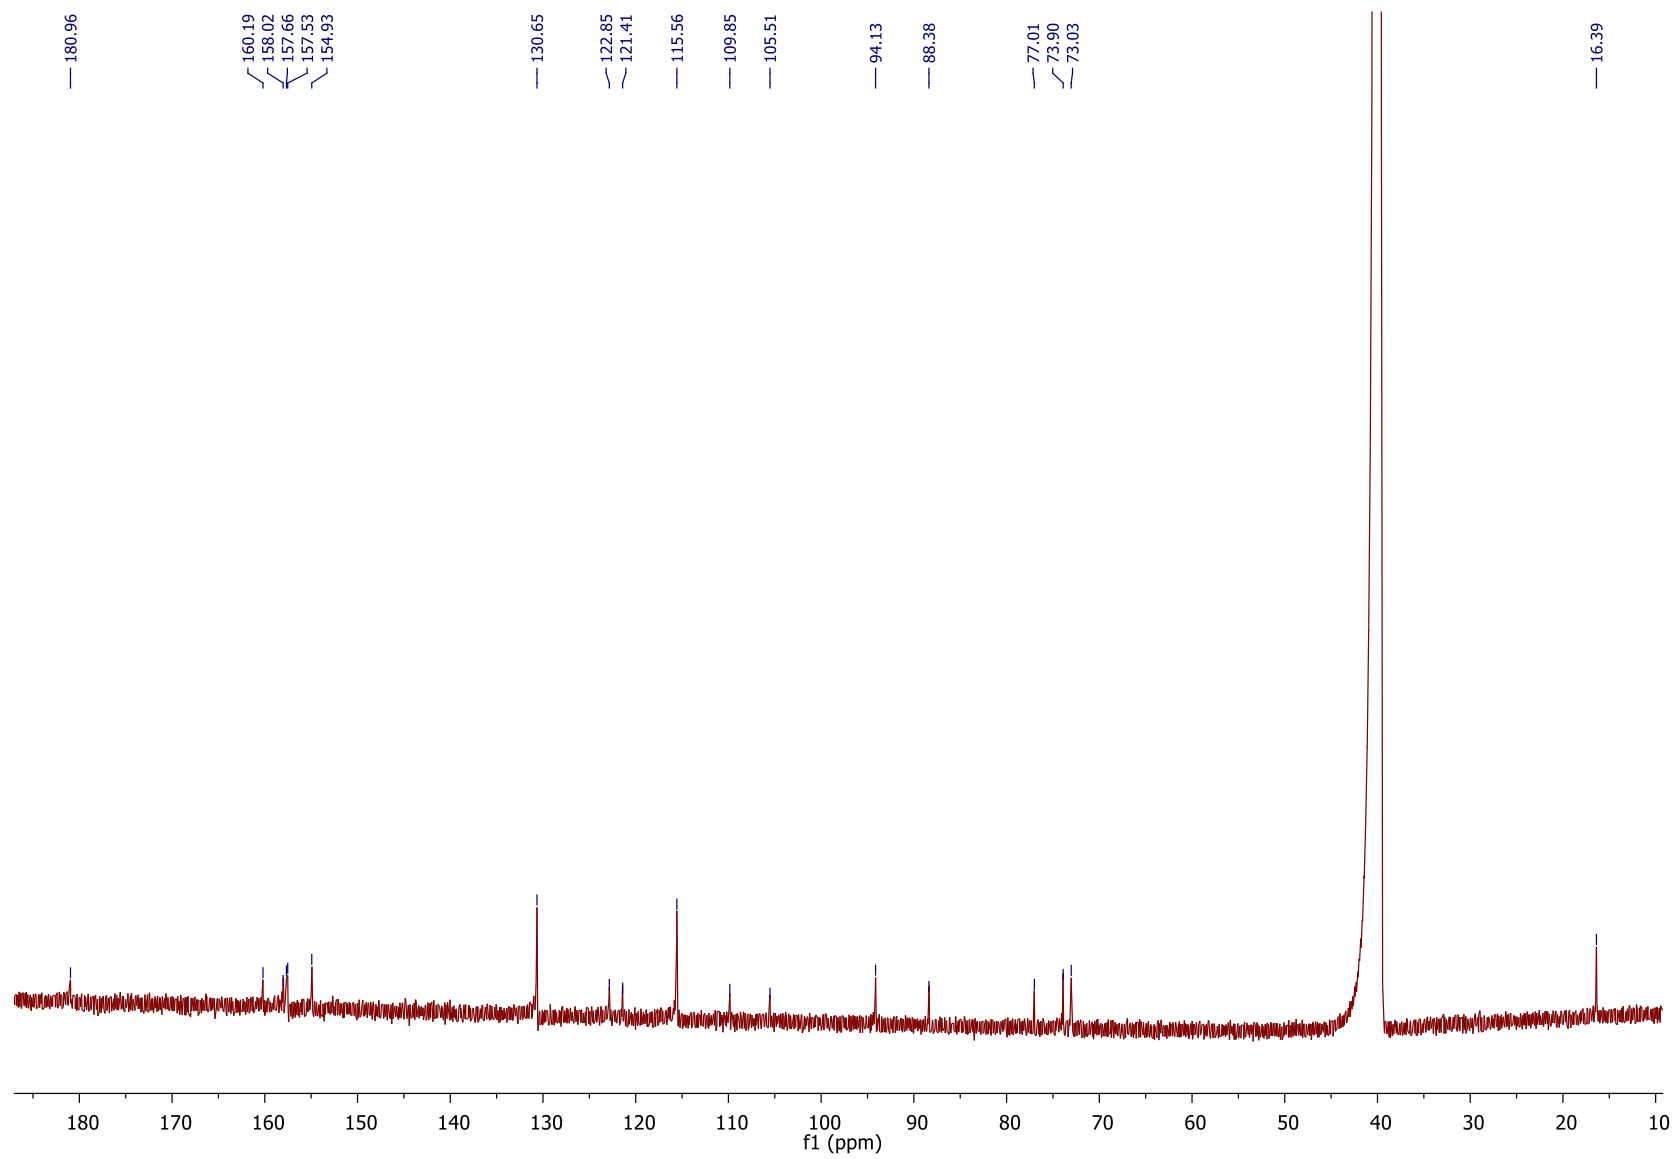

Fig. S34.  $^{13}\text{C}$  NMR spectrum of 5

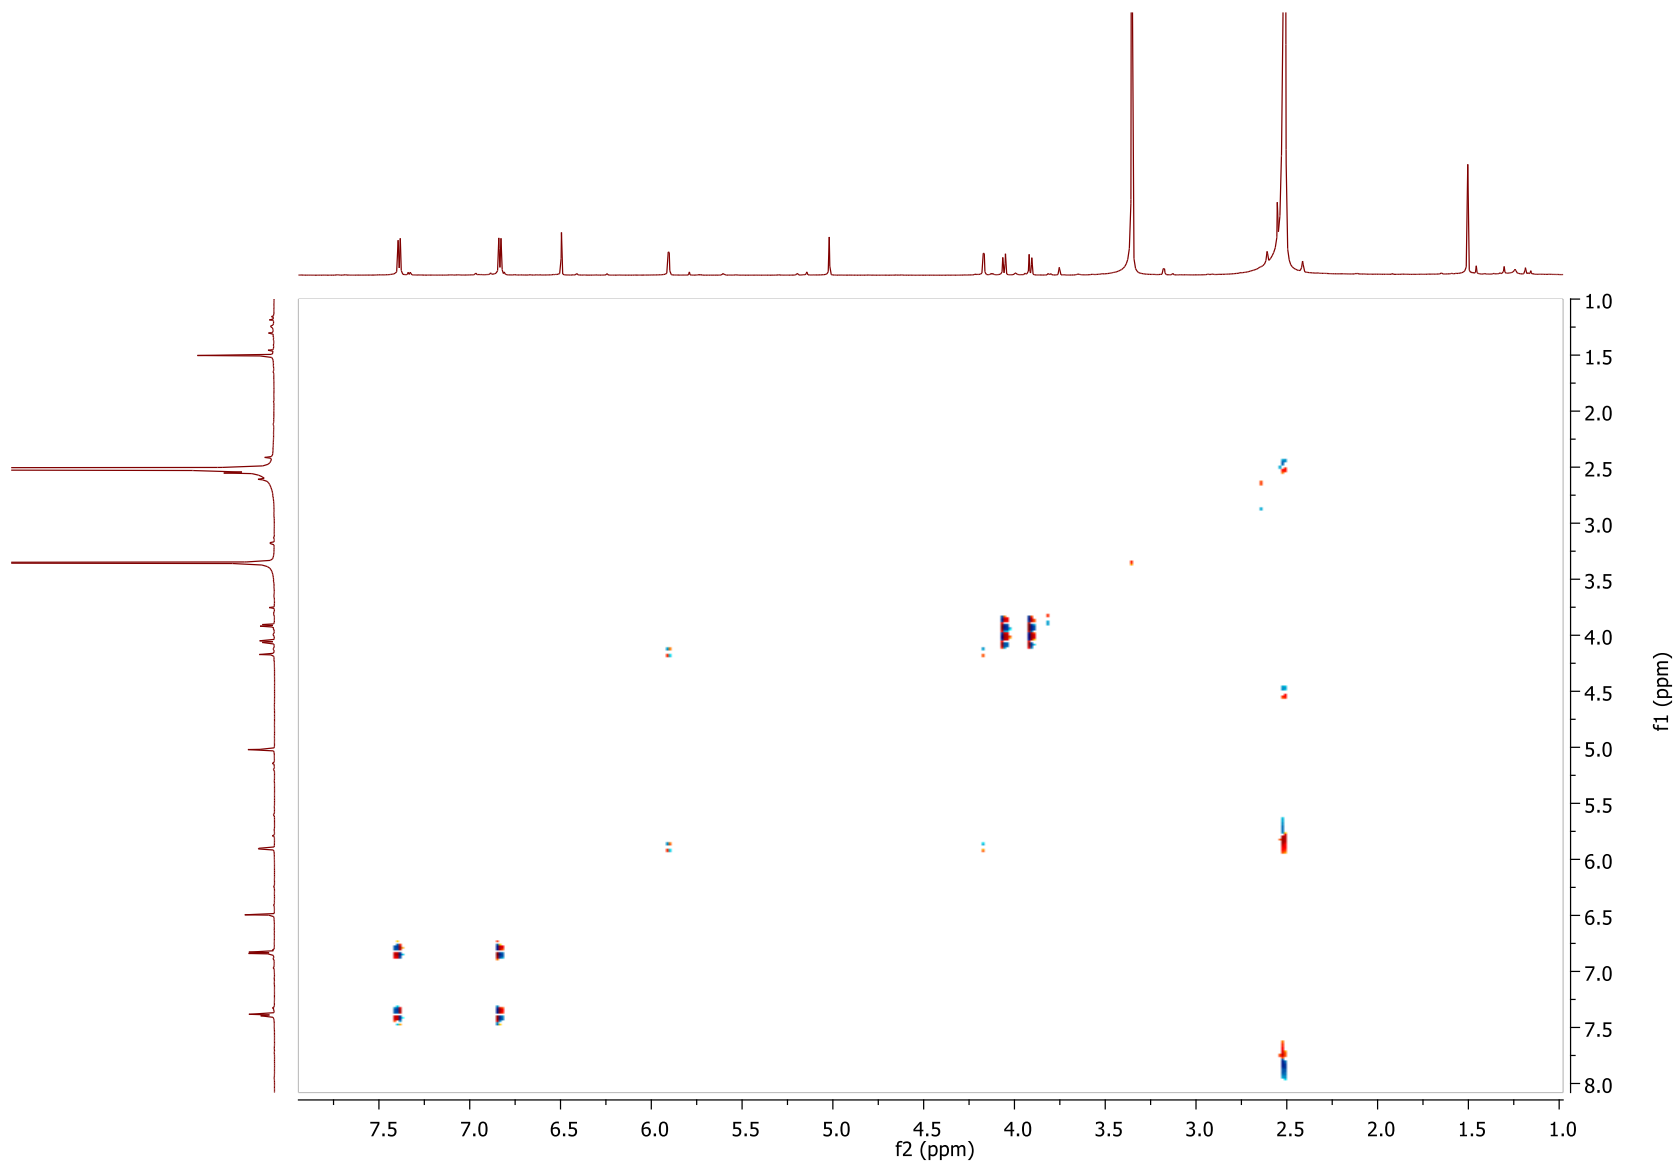

**Fig. S35.** COSY spectrum of **5**



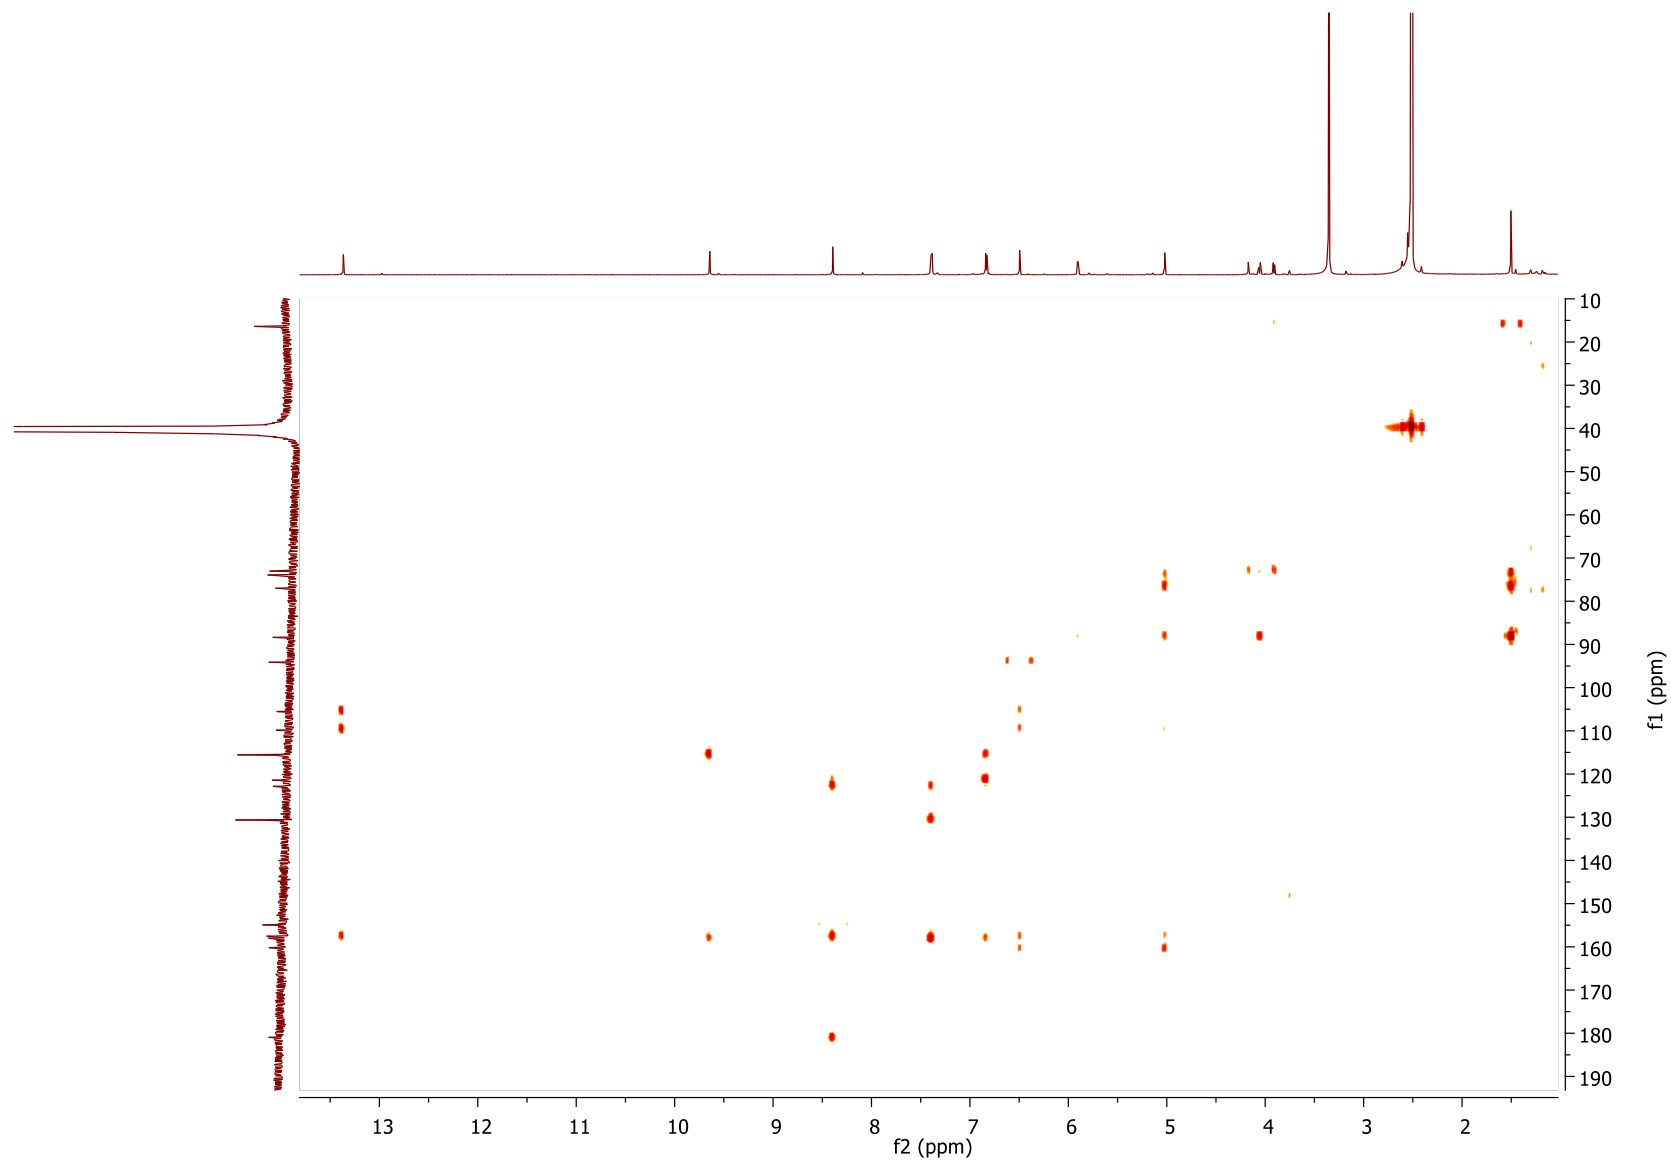

Fig. S36. HMBC spectrum of 5

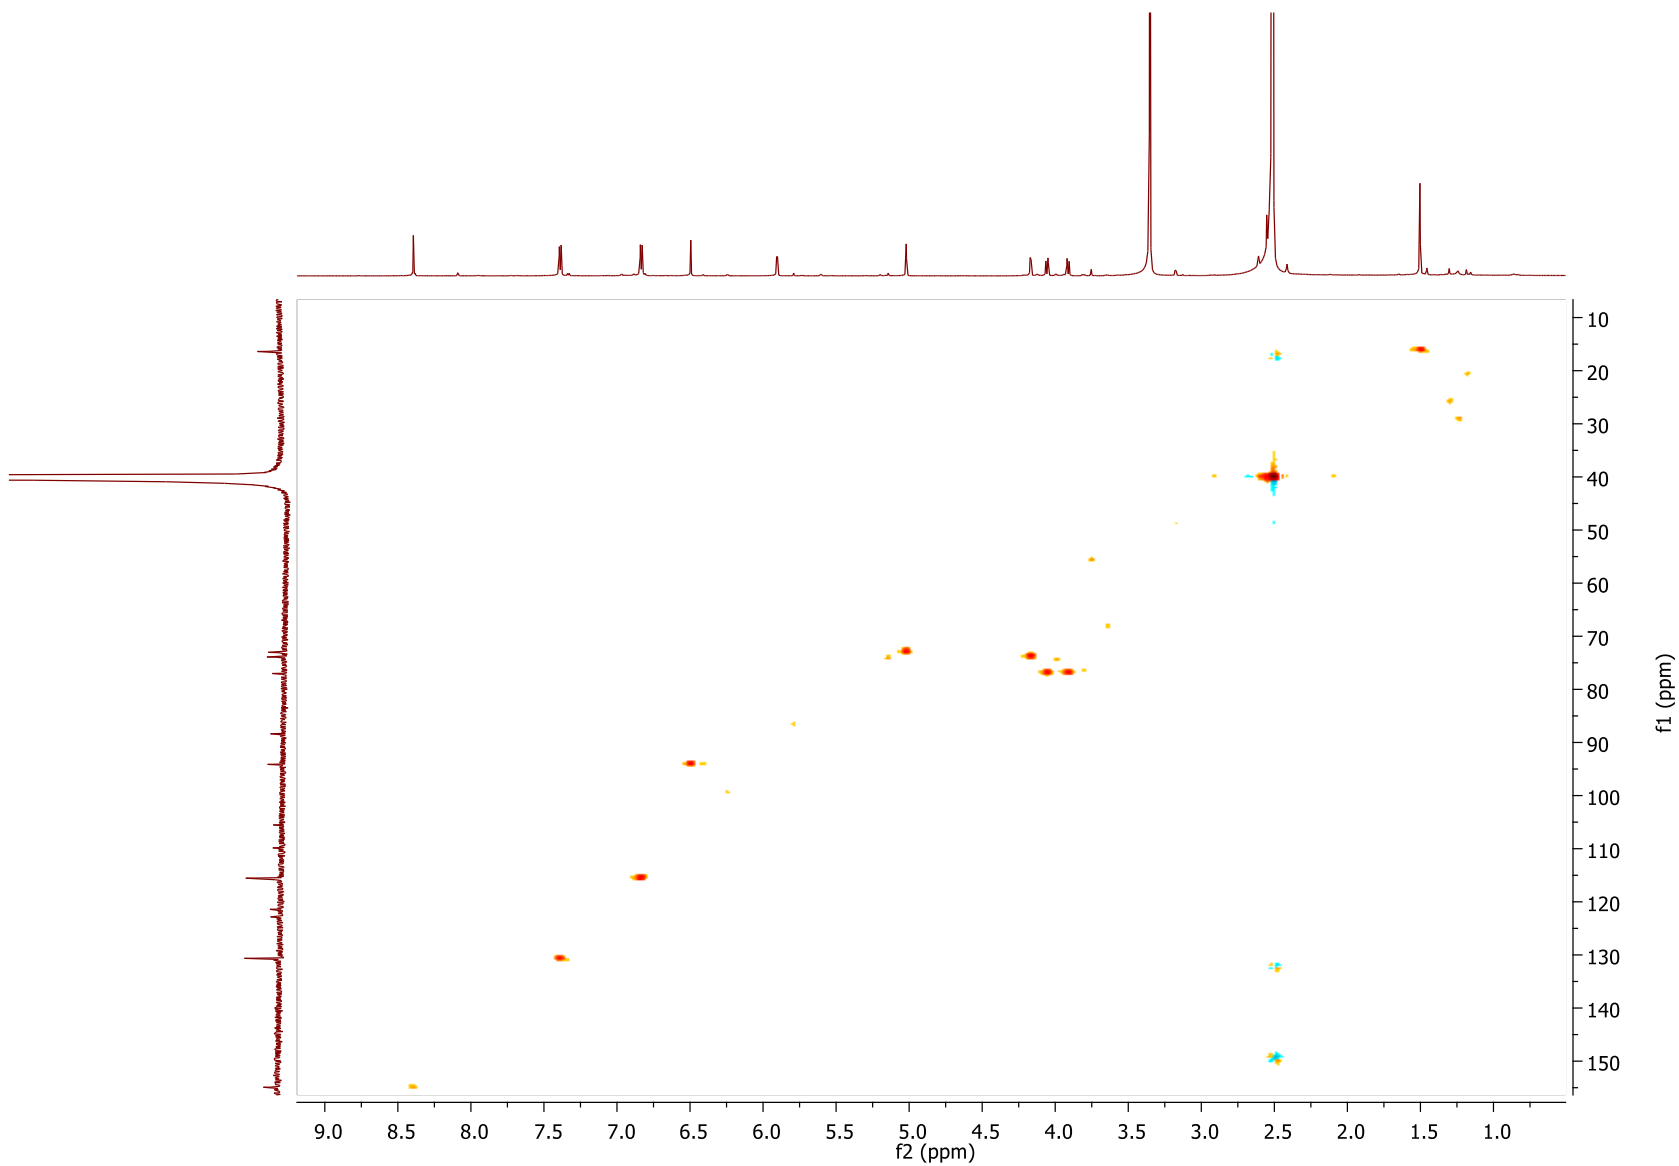

**Fig. S37.** HSQC spectrum of **5**

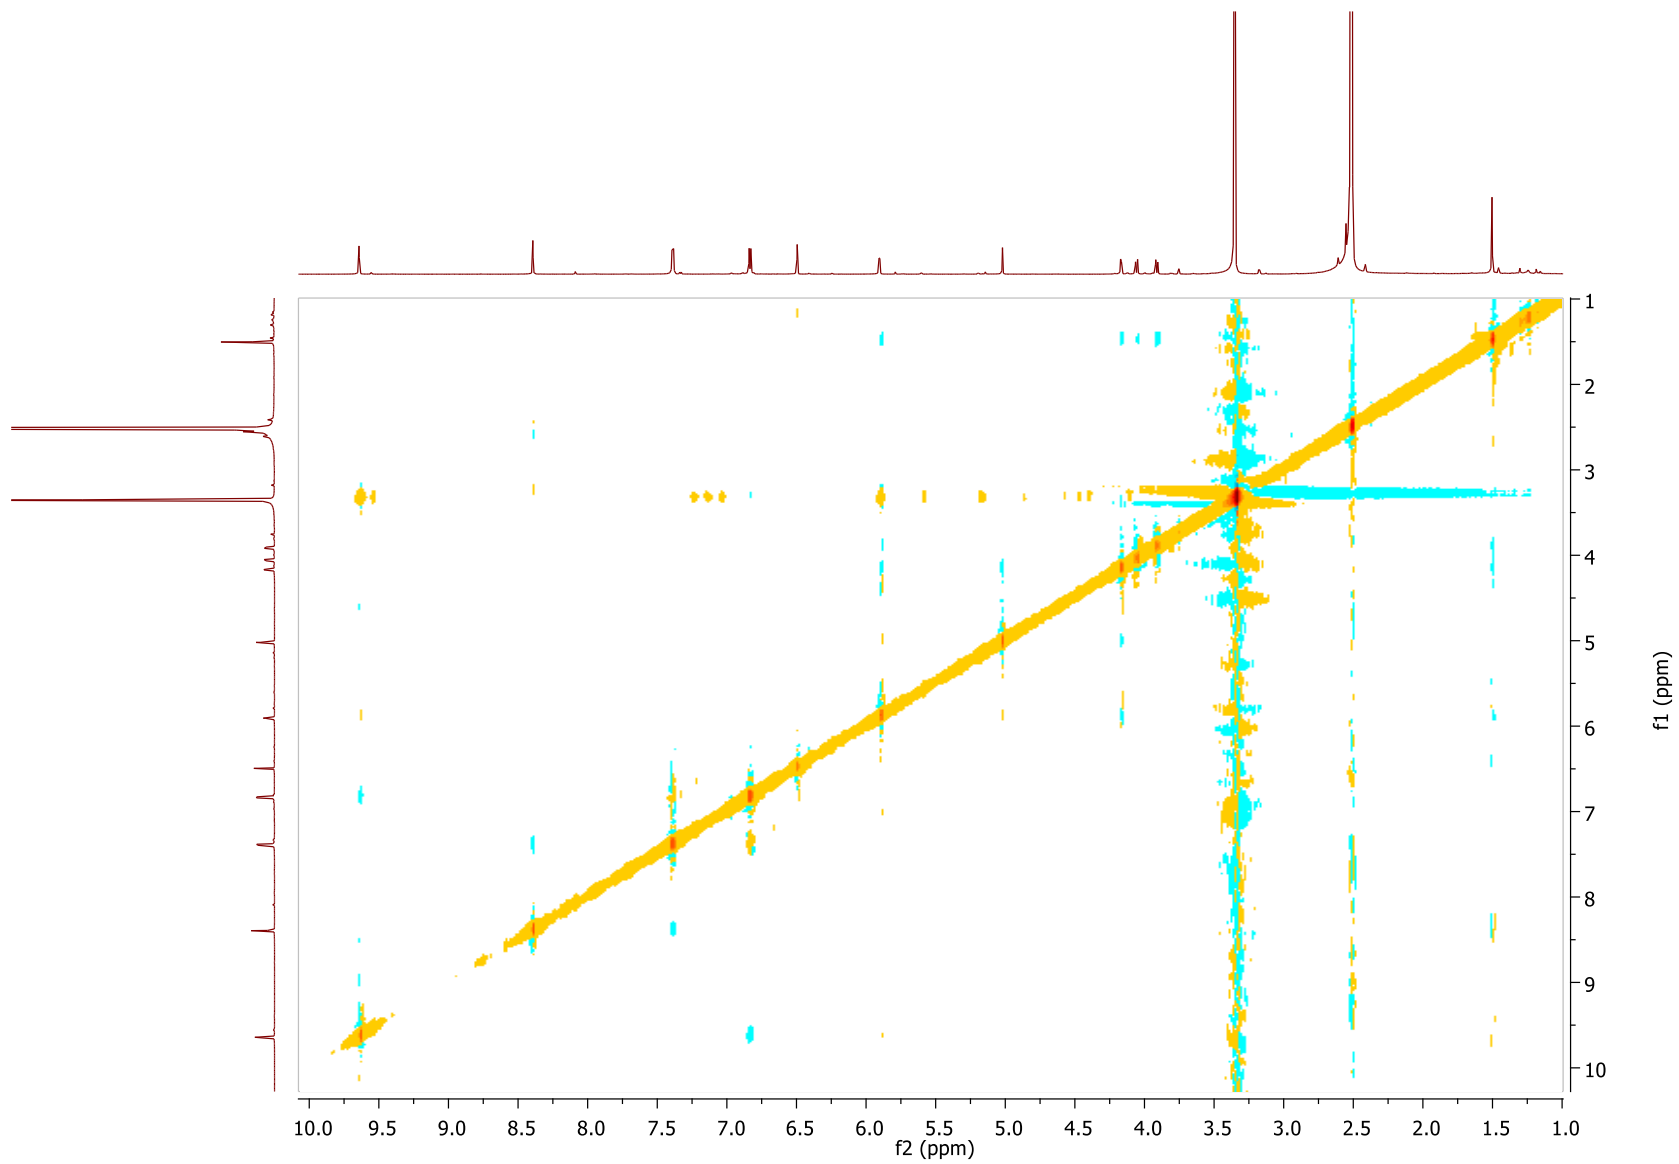

Fig. S38. NOESY spectrum of 5

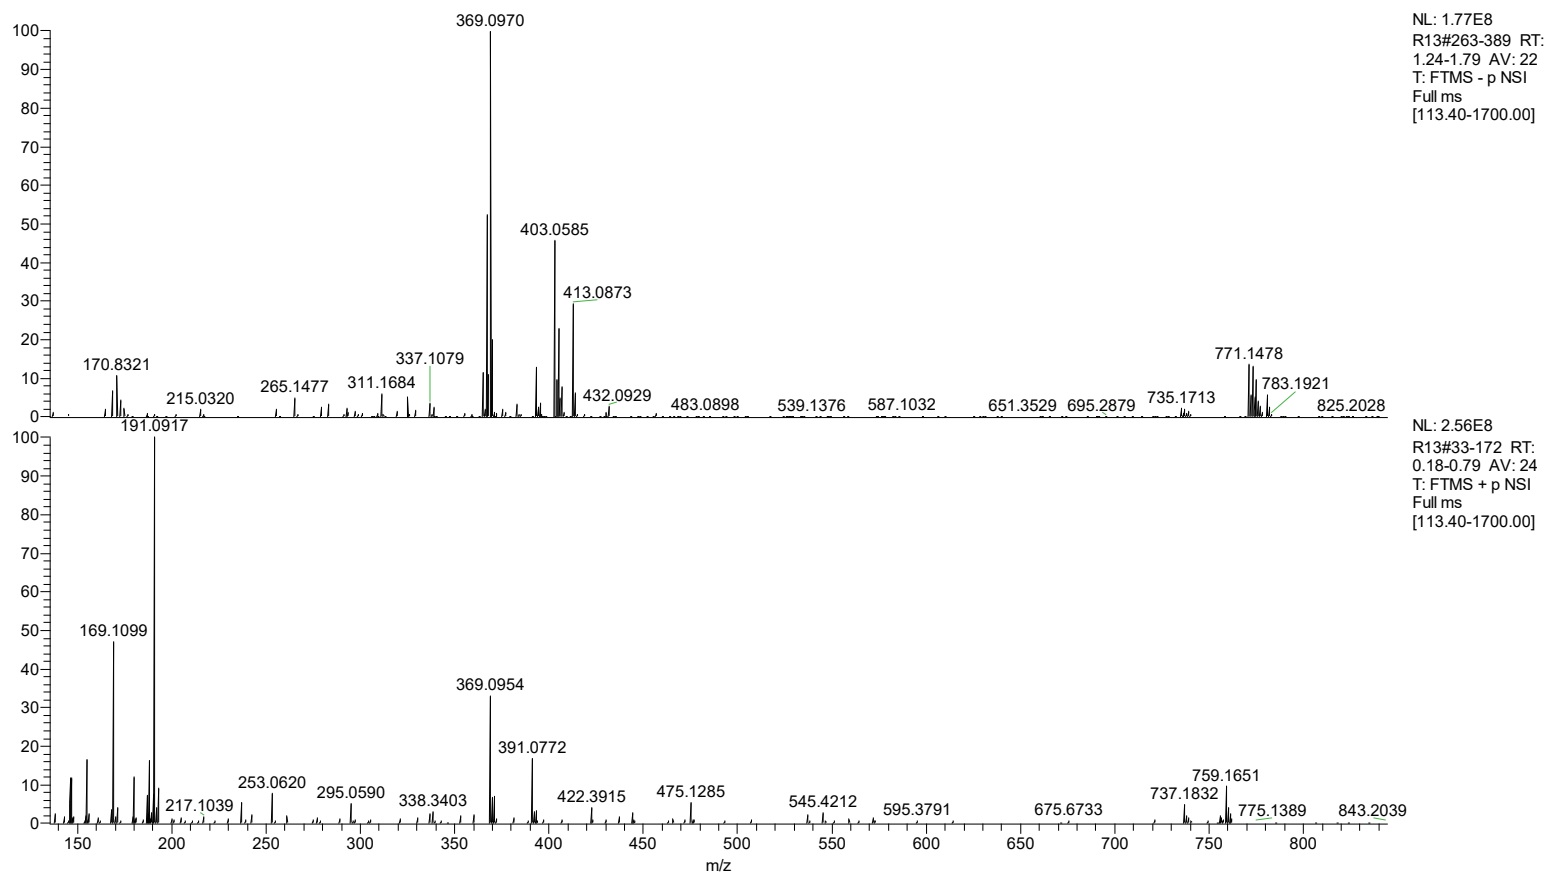

Fig. S39. HRMS of 6

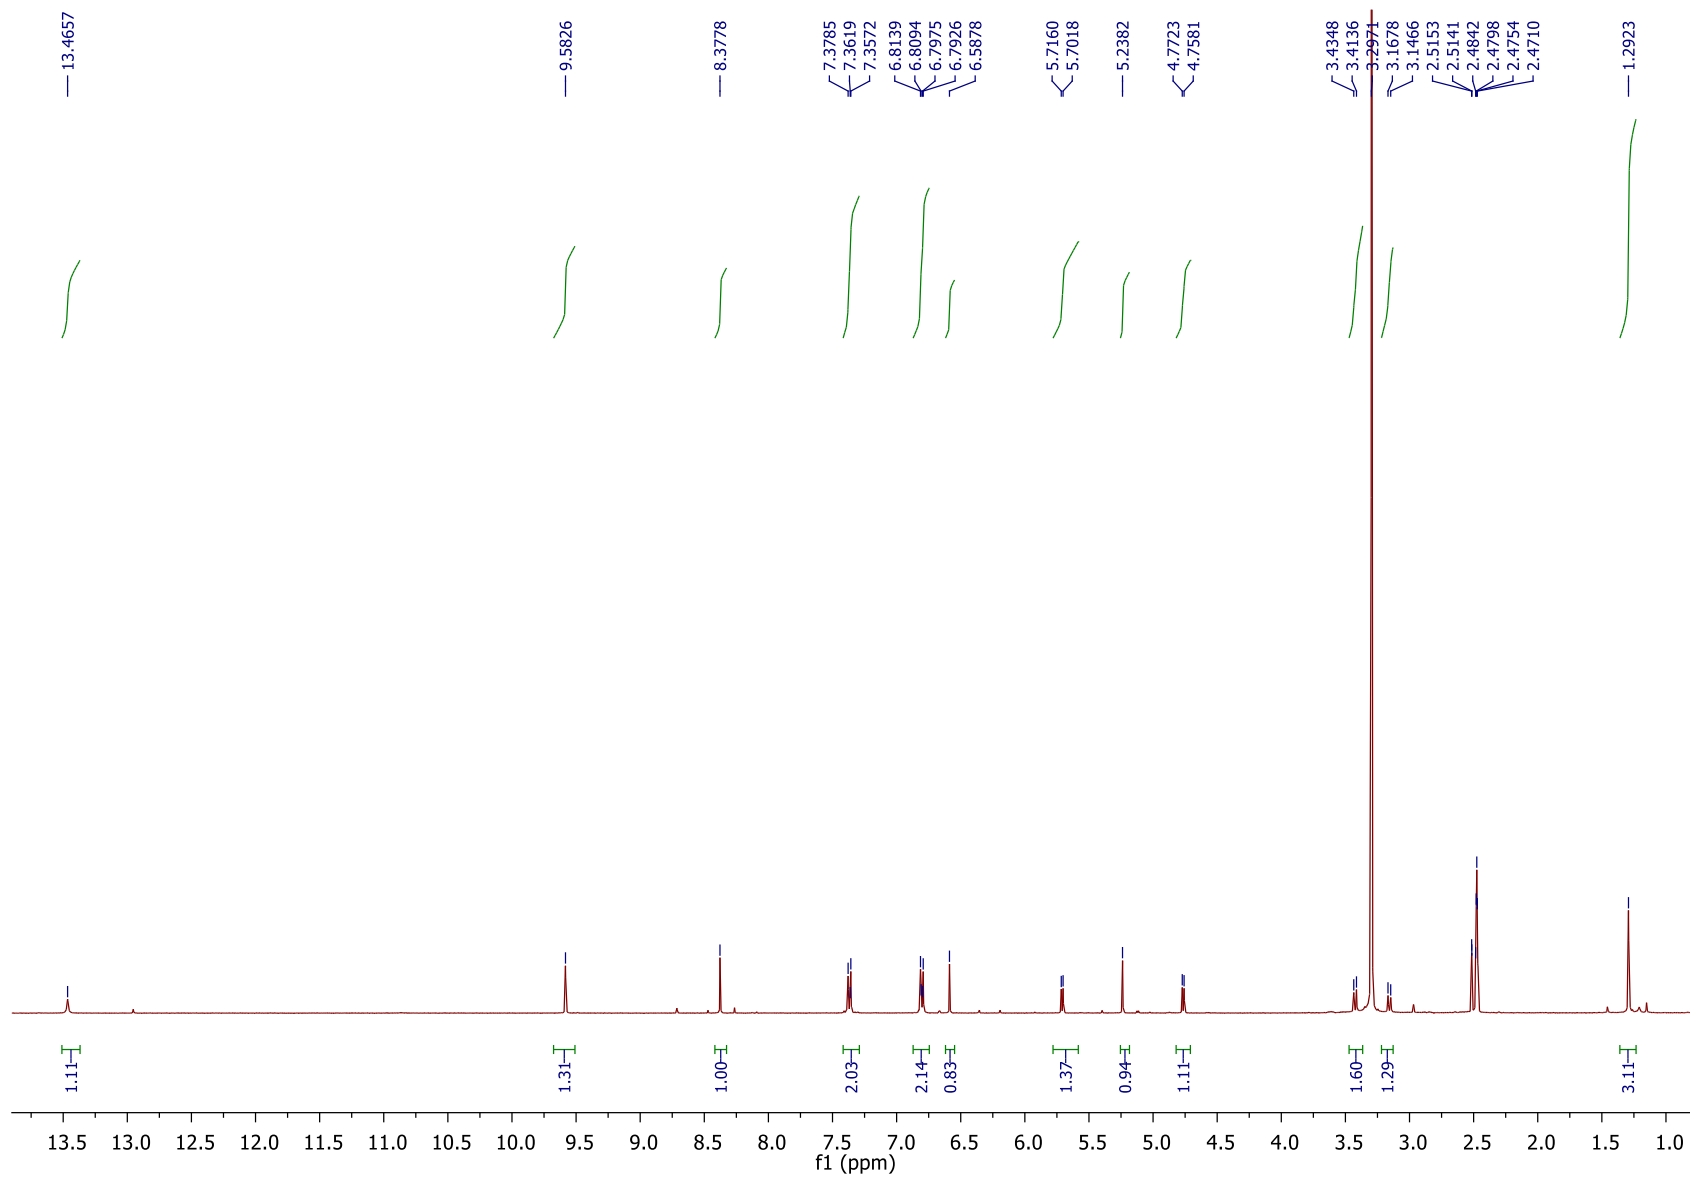

Fig. S40. <sup>1</sup>H NMR spectrum of **6**

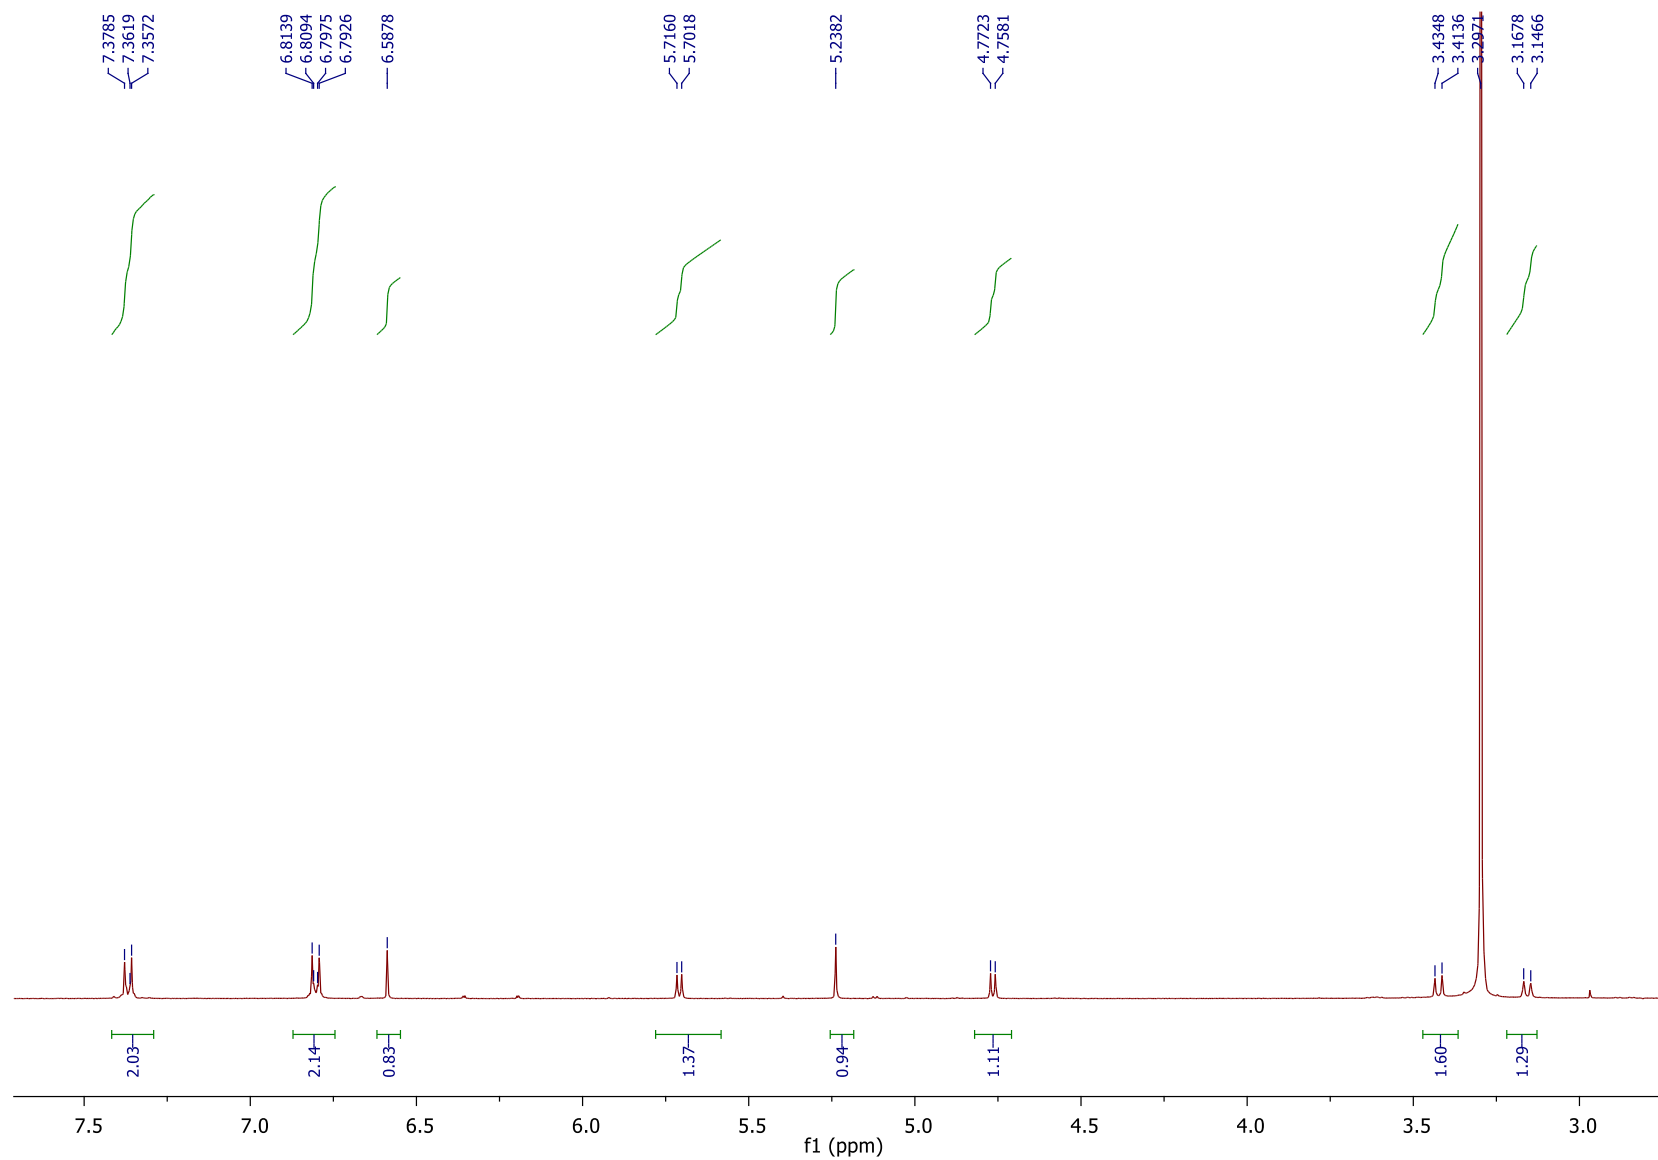

Fig. S41. Expansion of <sup>1</sup>H NMR of 6

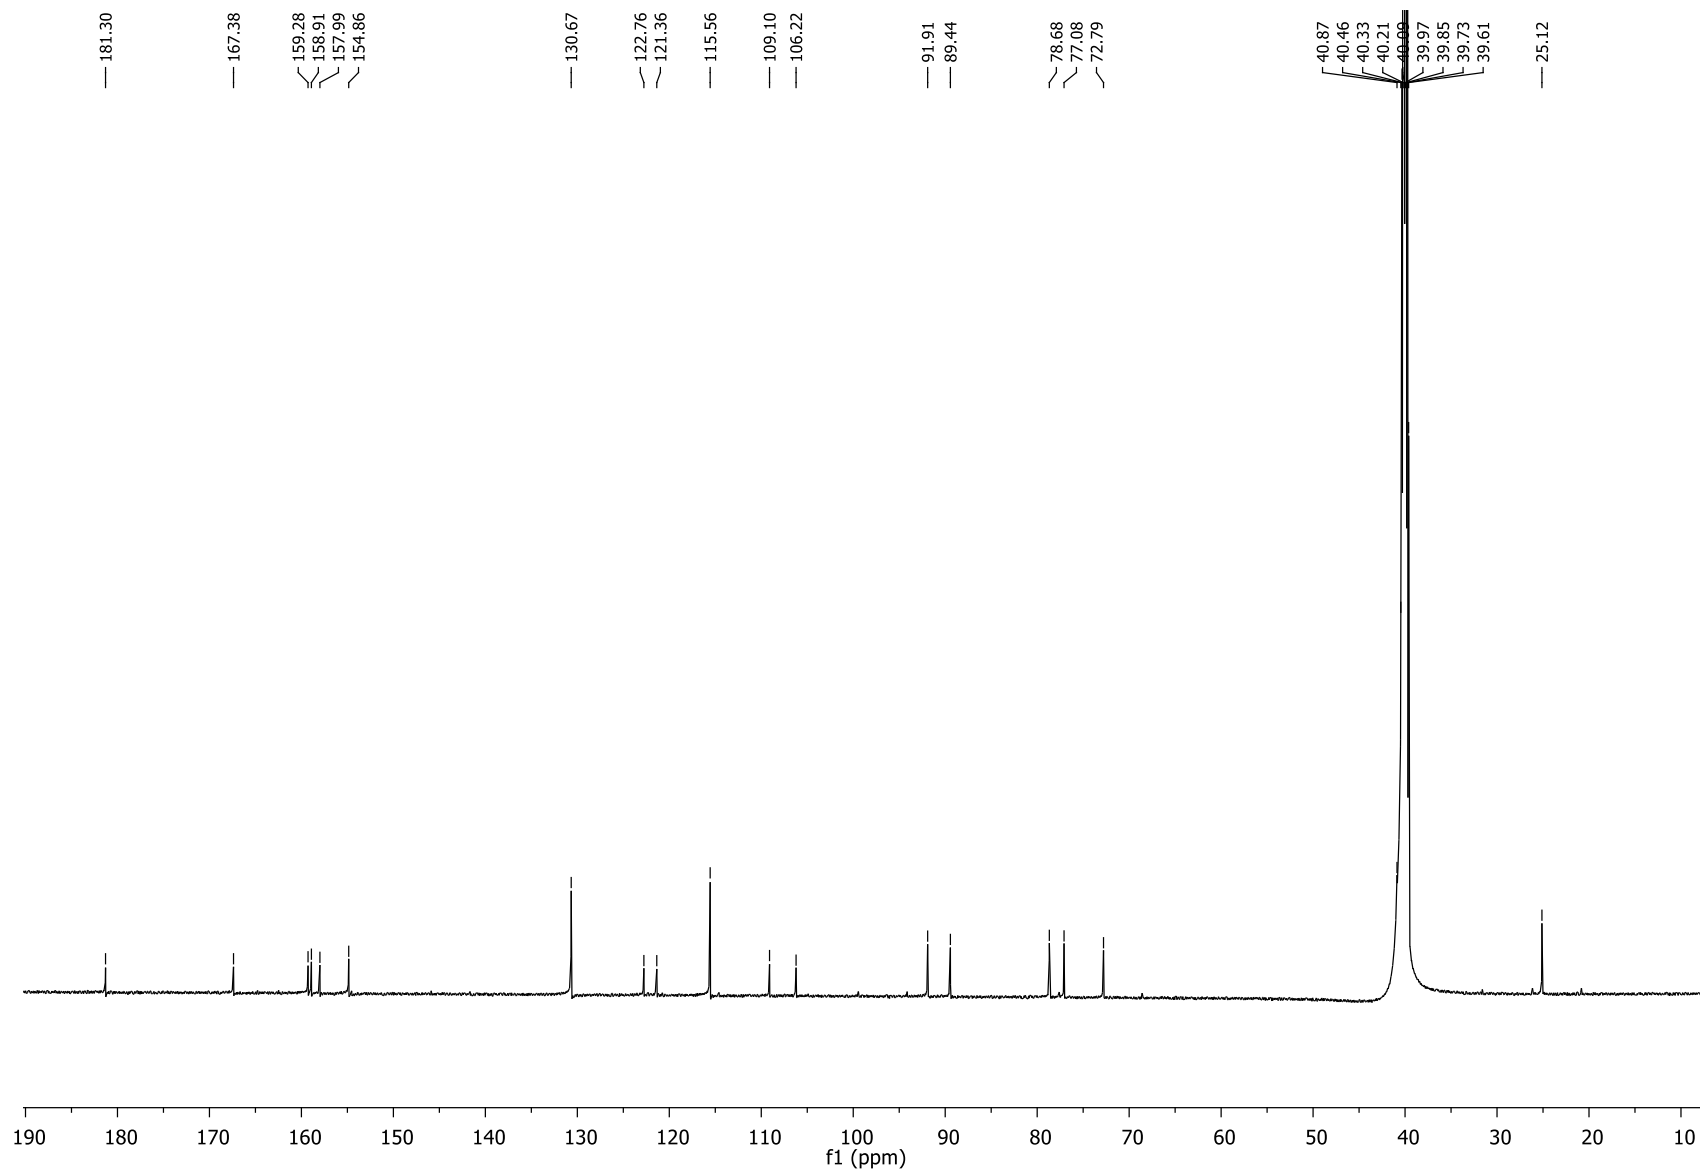

Fig. S42.  $^{13}\text{C}$  NMR spectrum of **6**

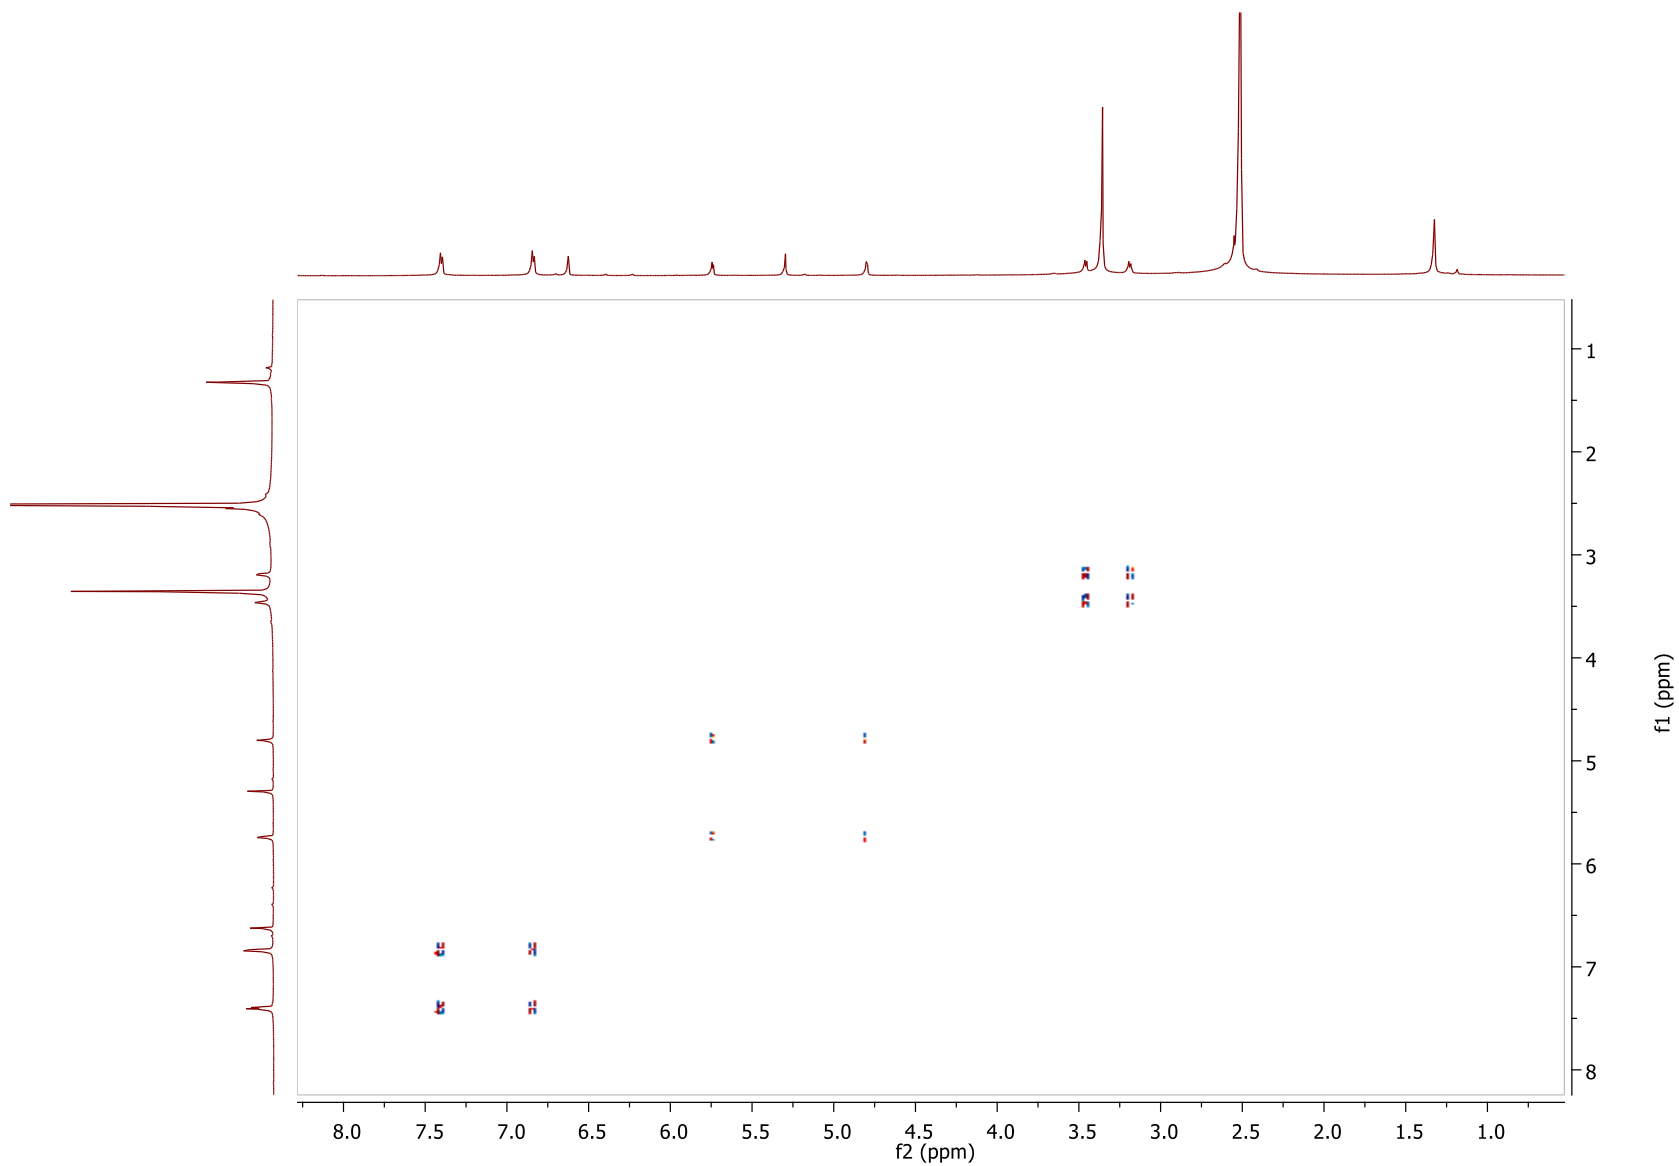

**Fig. S43.** COSY spectrum of **6**



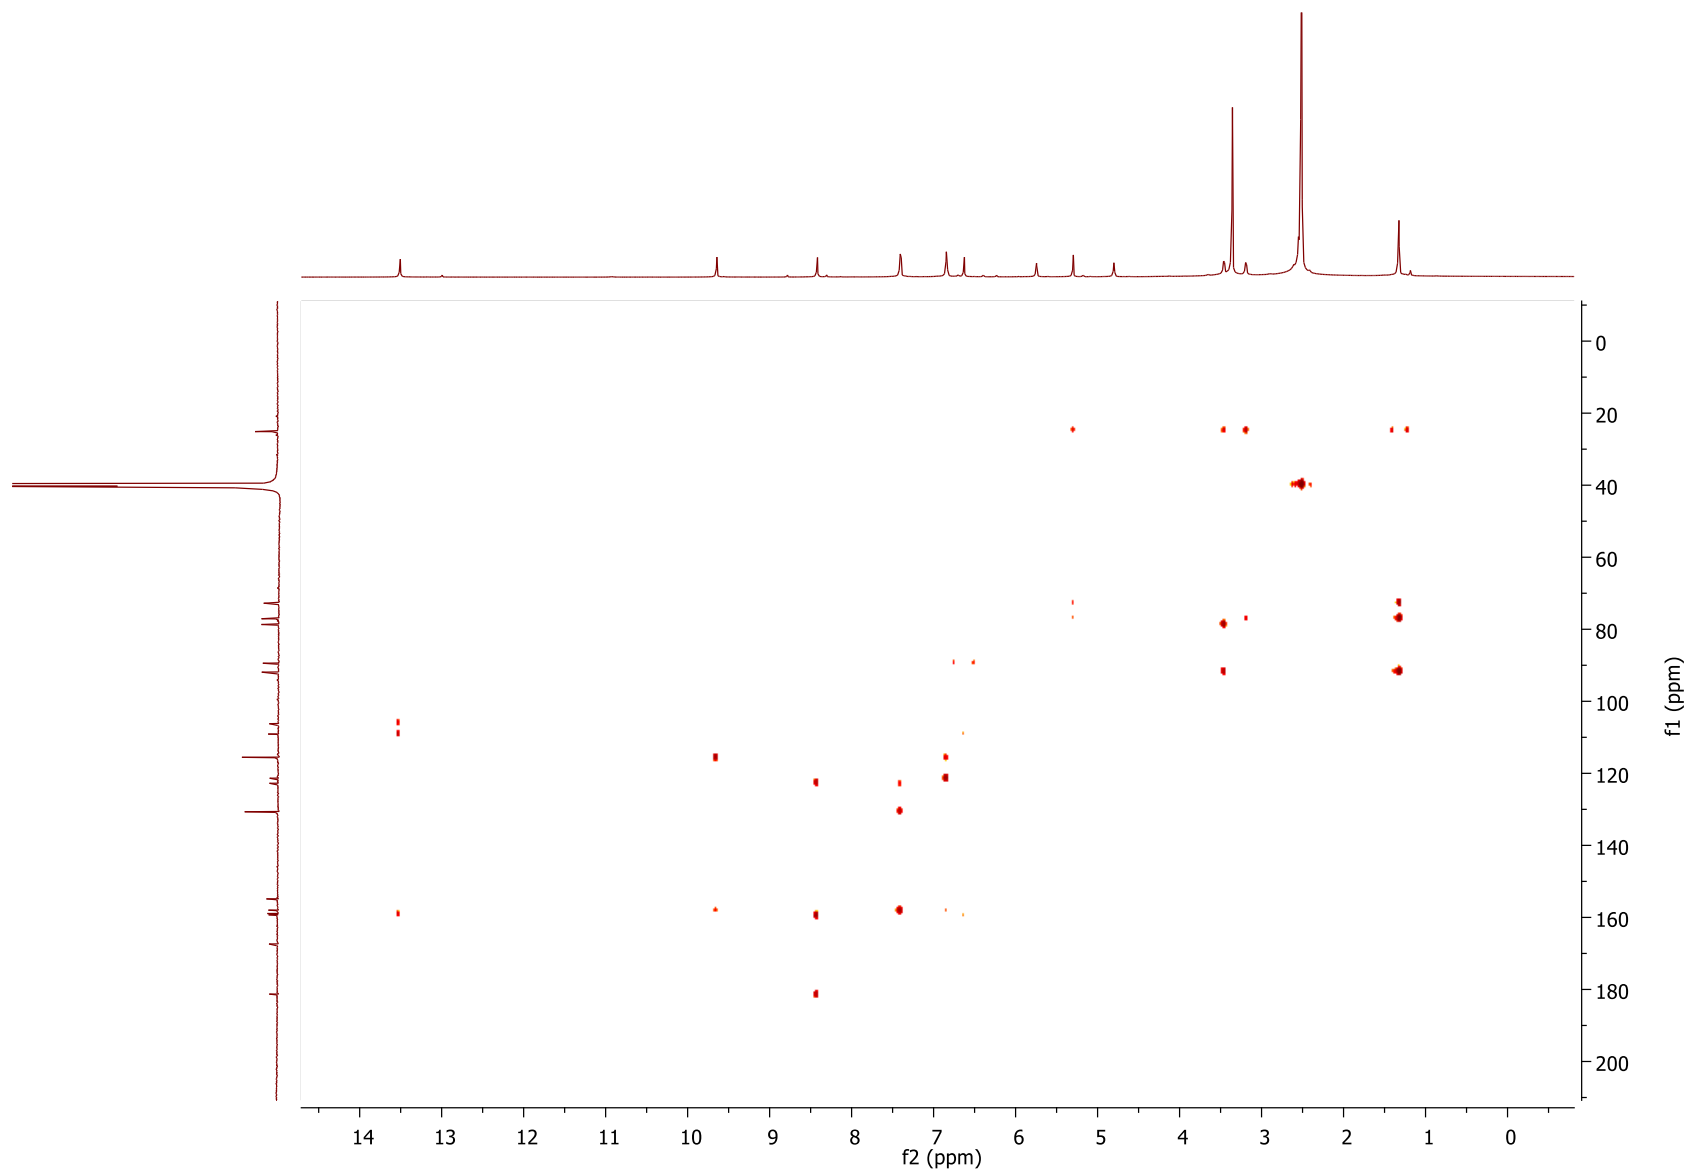

**Fig. S44.** HMBC spectrum of **6**

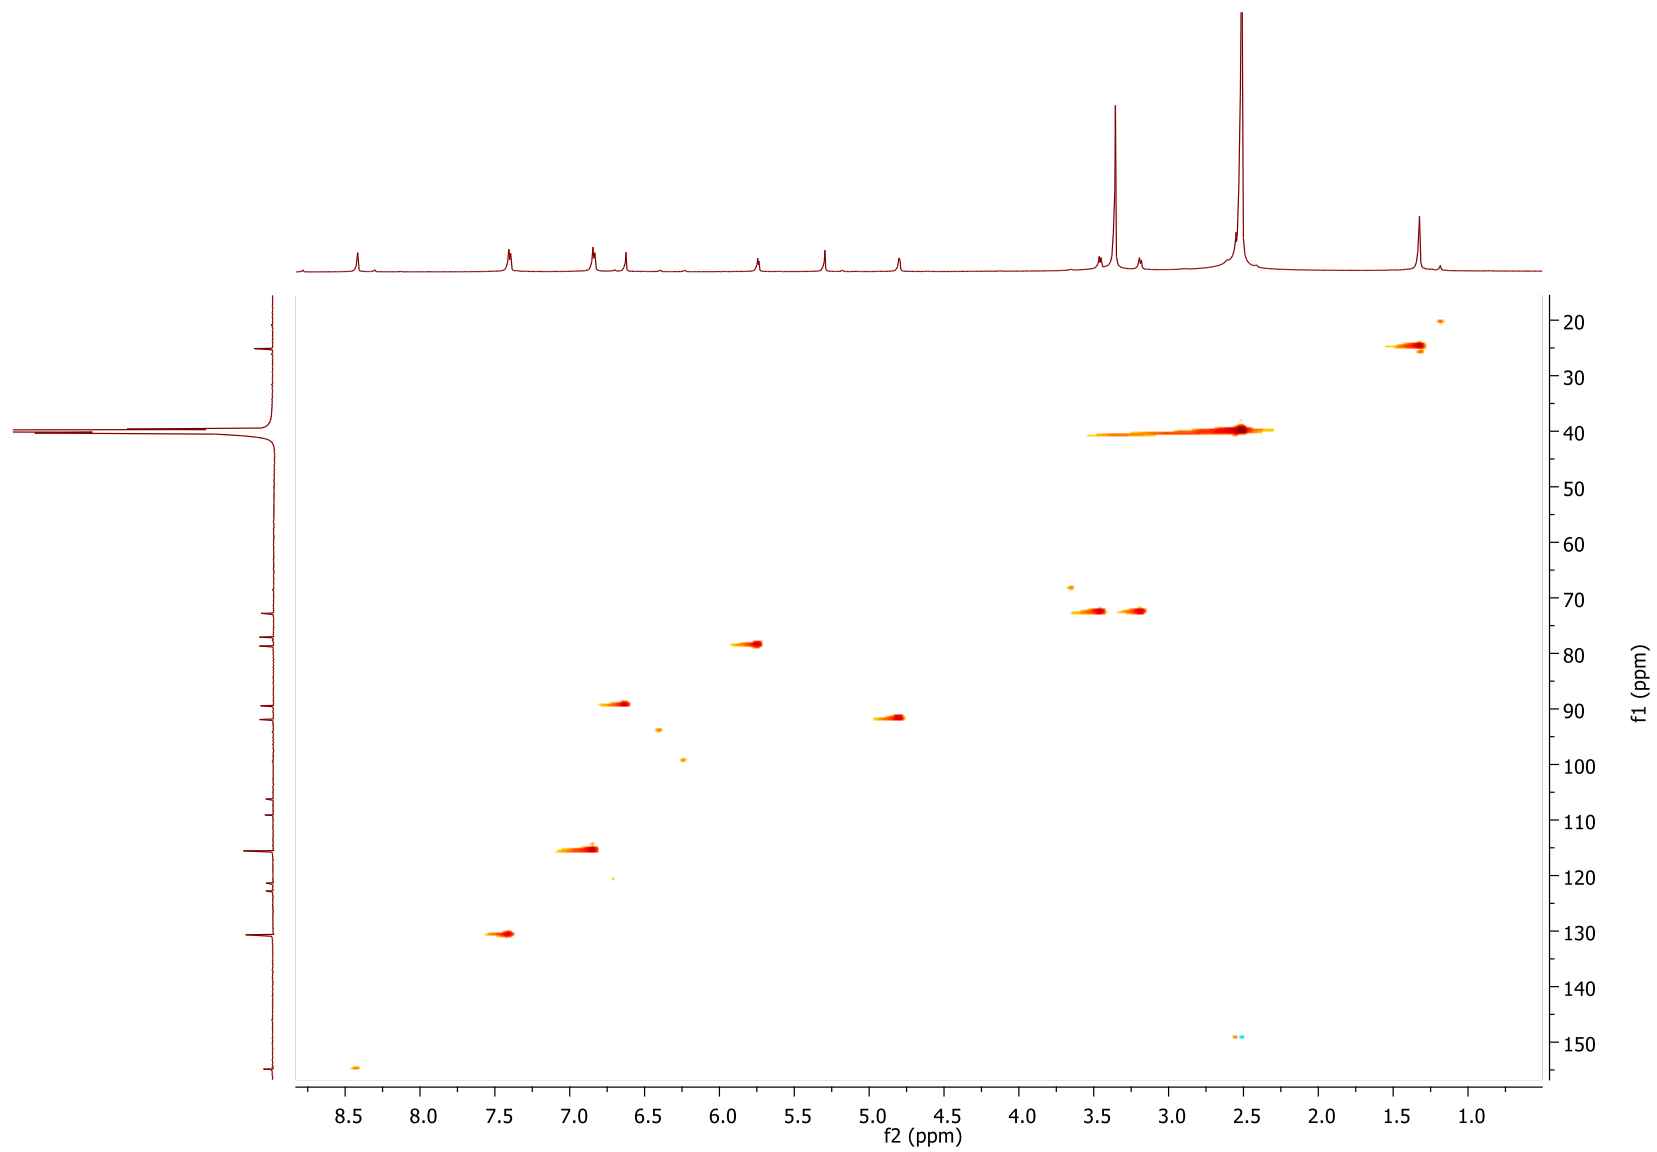

Fig. S45. HSQC spectrum of 6

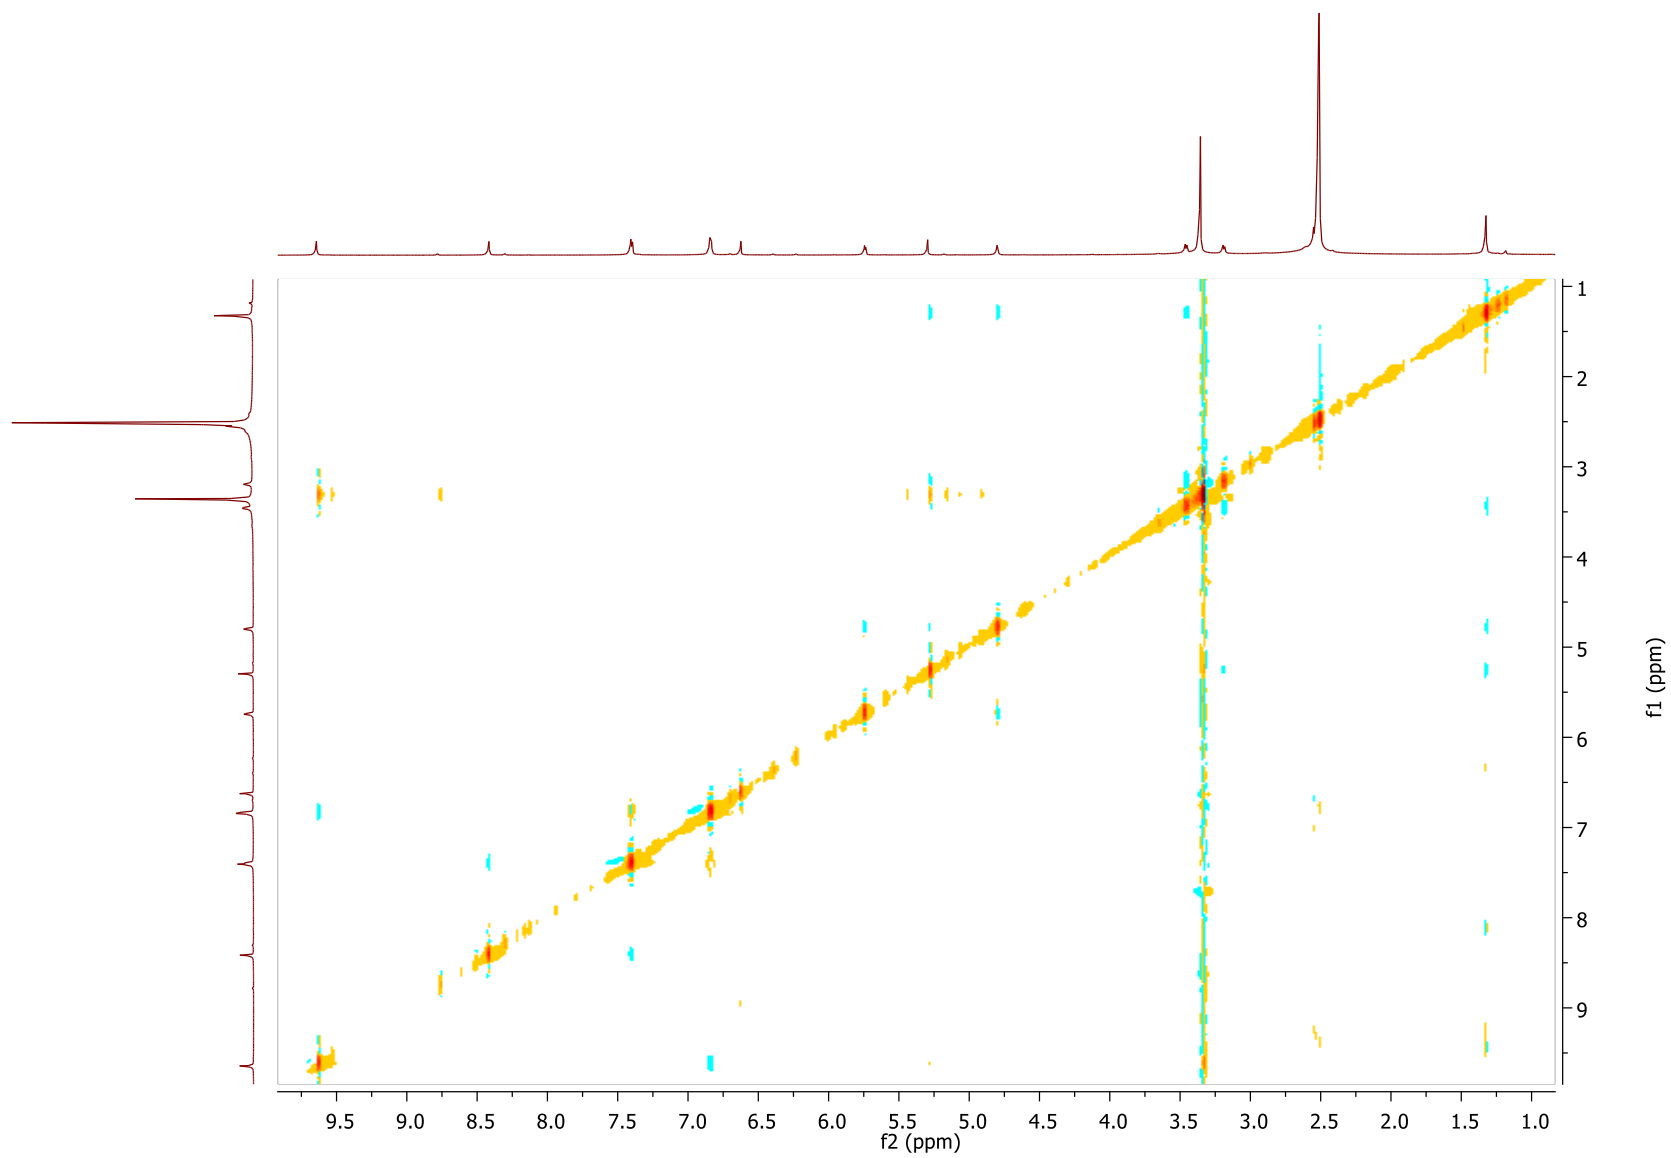

Fig. S46. NOESY of 6

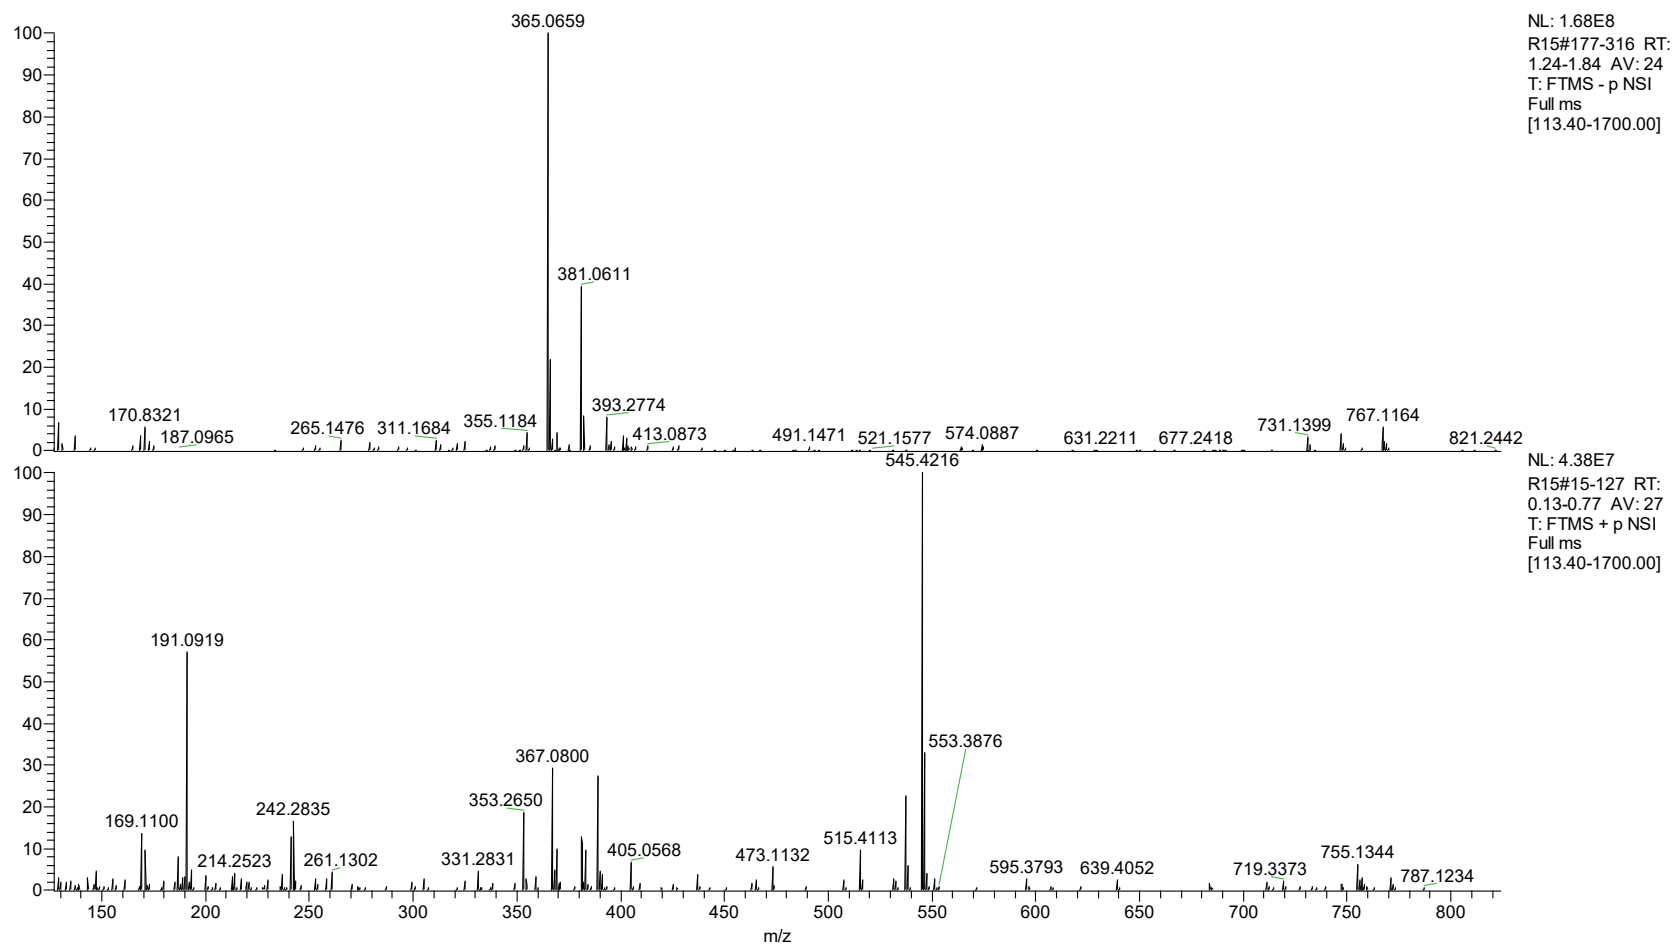

Fig. S47. HRMS of 7

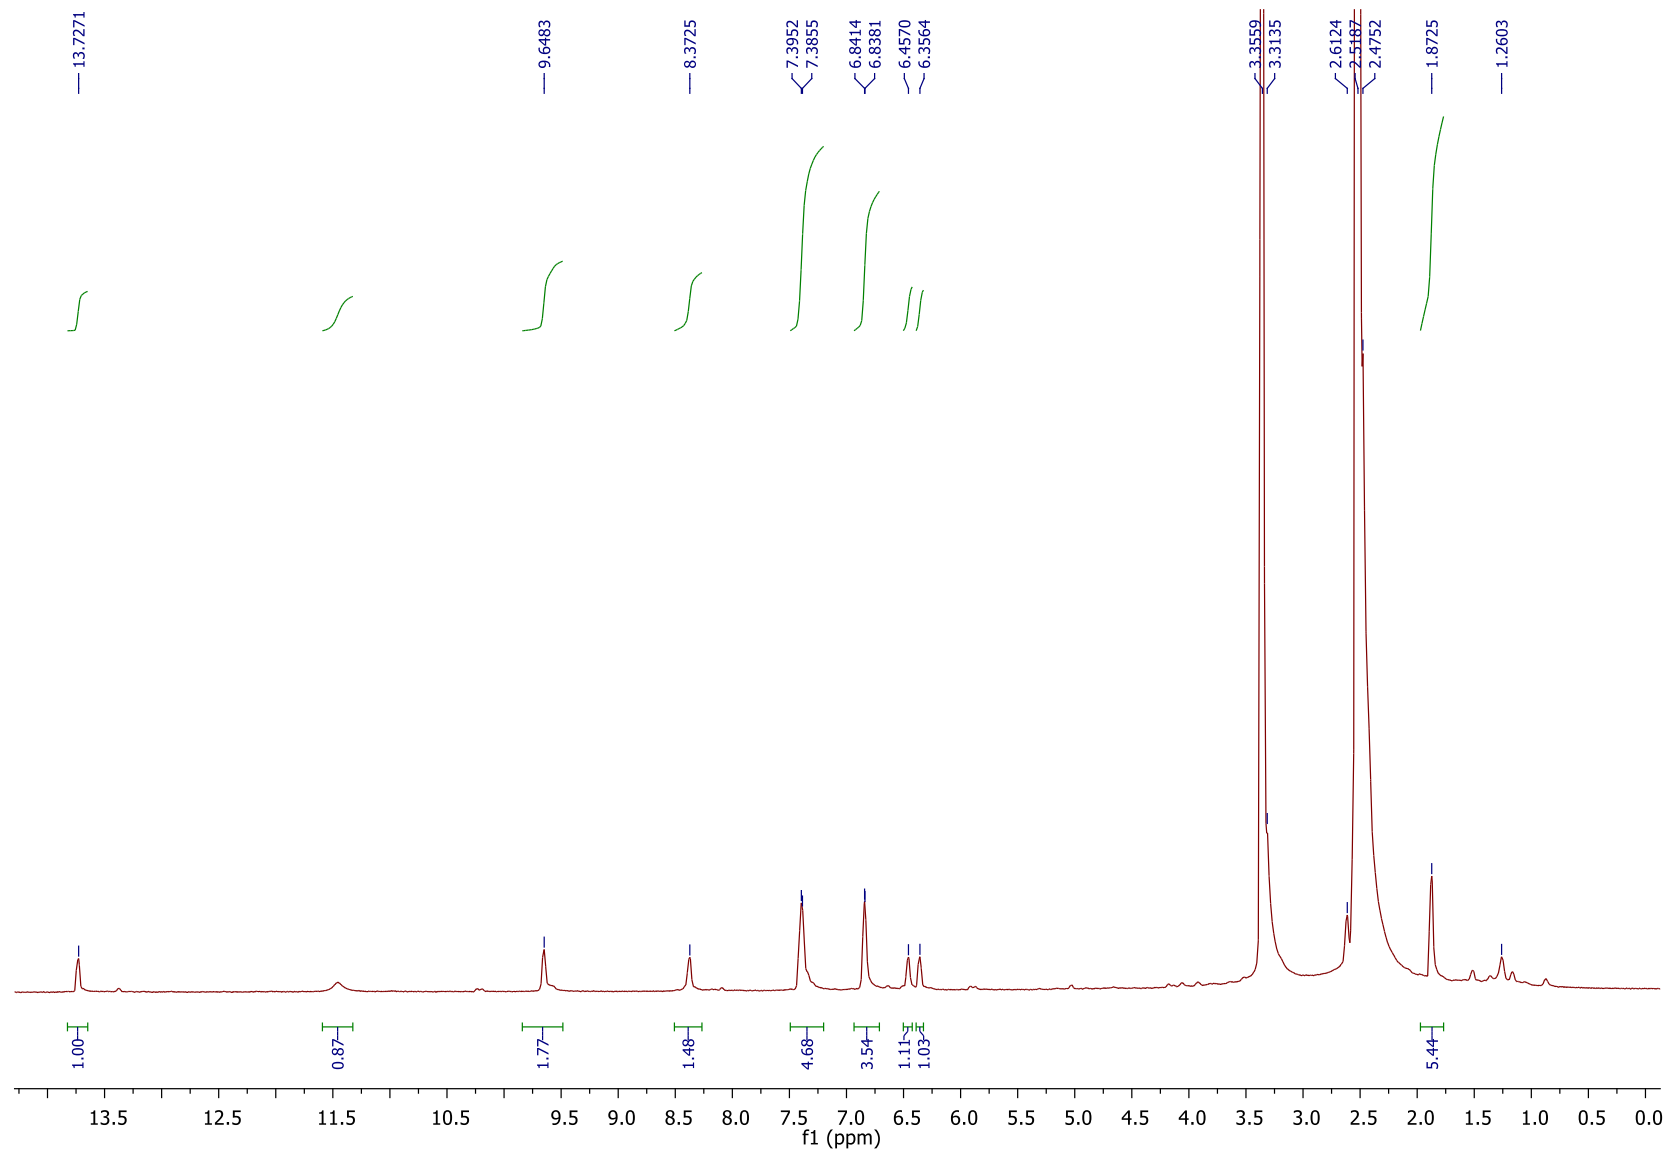

Fig. S48. <sup>1</sup>H NMR spectrum of 7

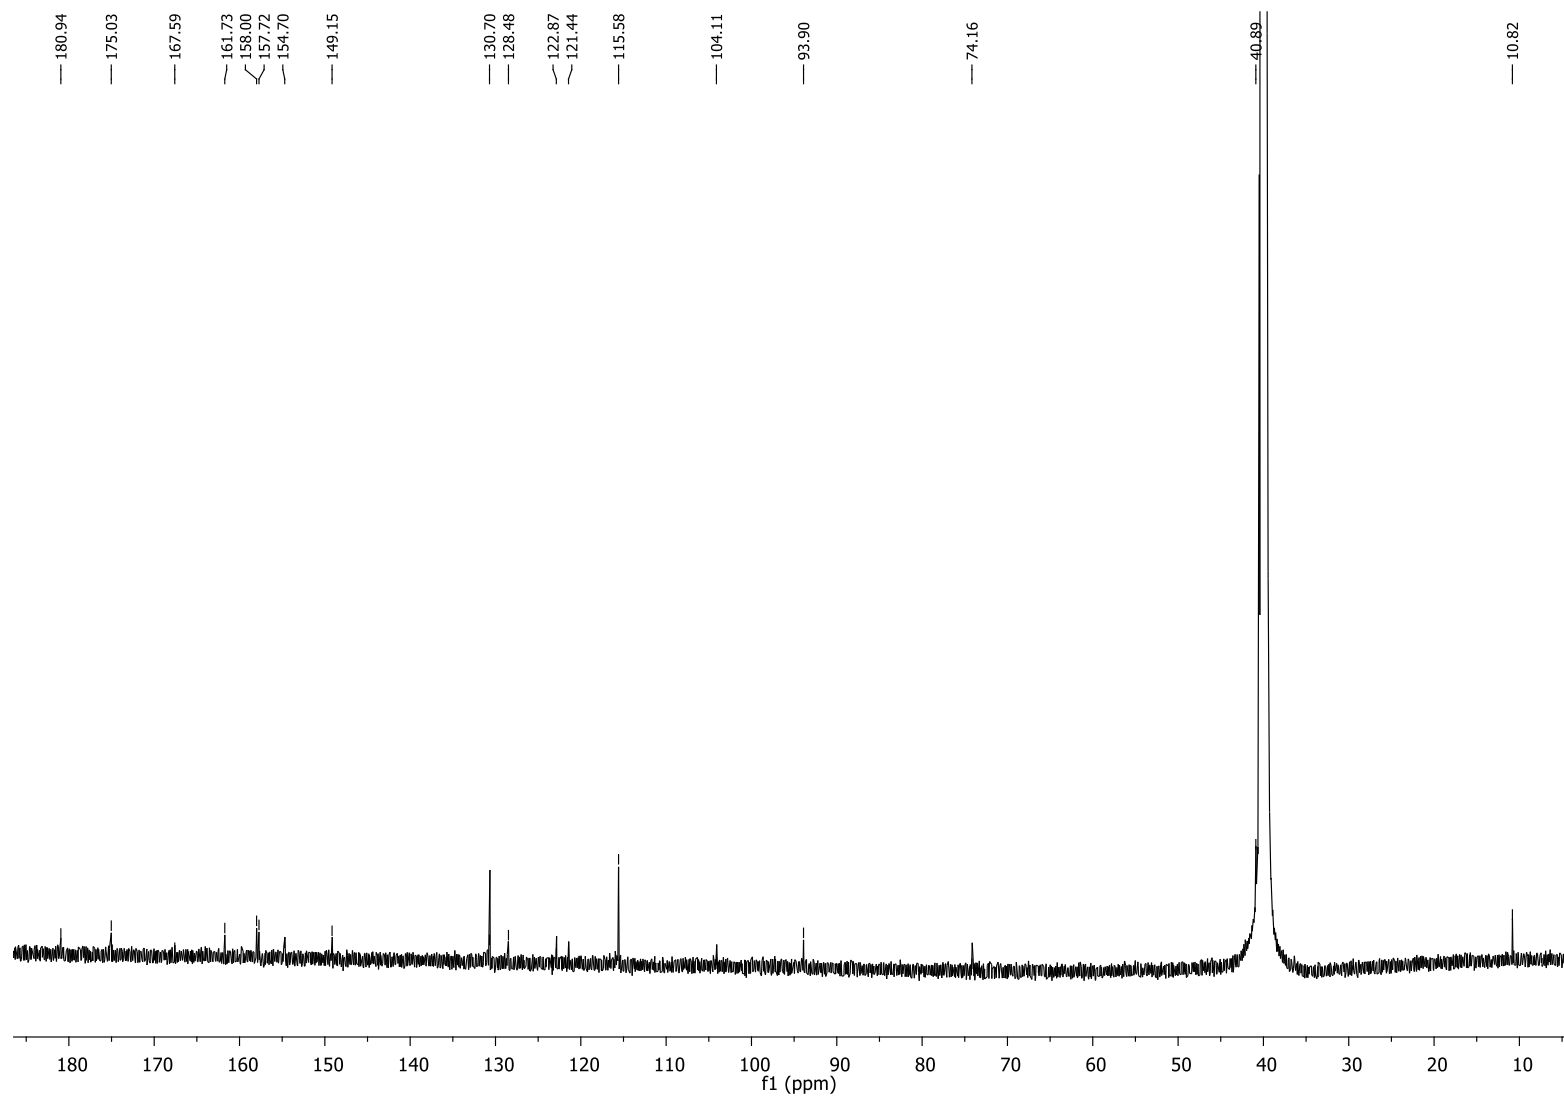

Fig. S49.  $^{13}\text{C}$  NMR spectrum of **7**

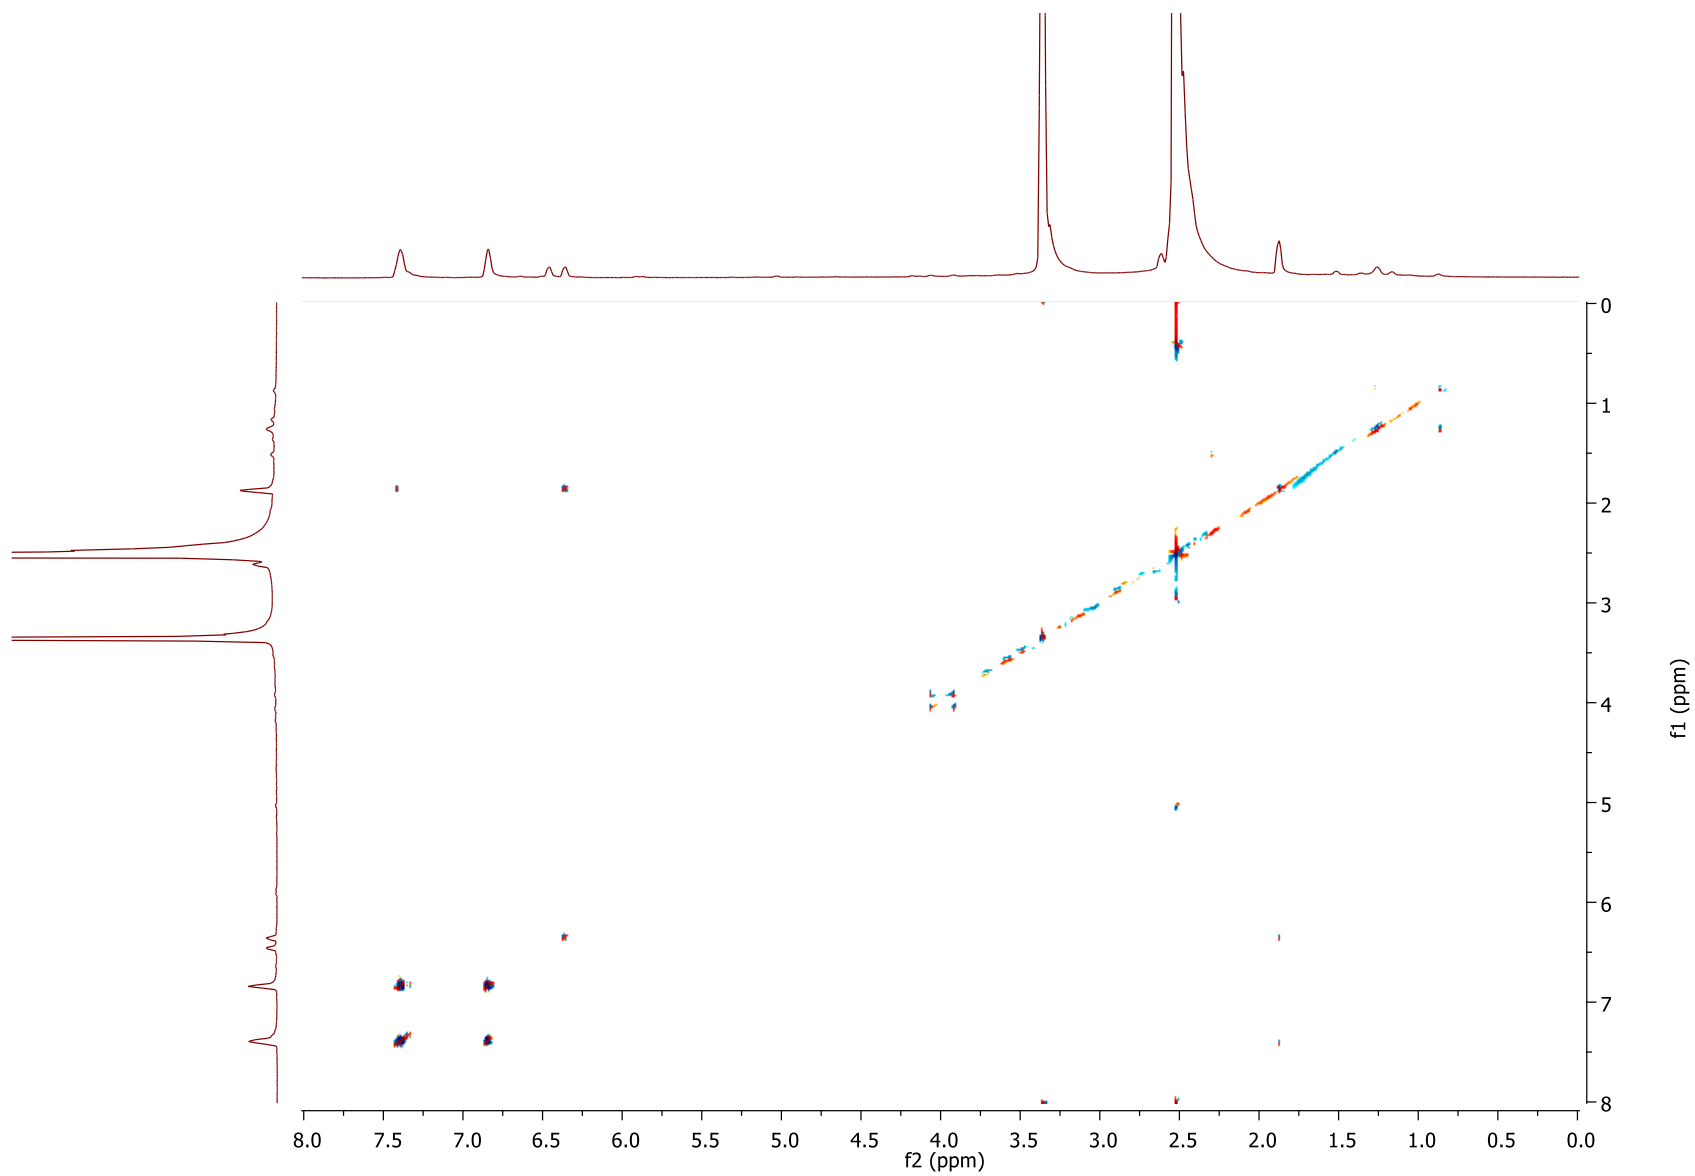

**Fig. S50.** COSY spectrum of **7**

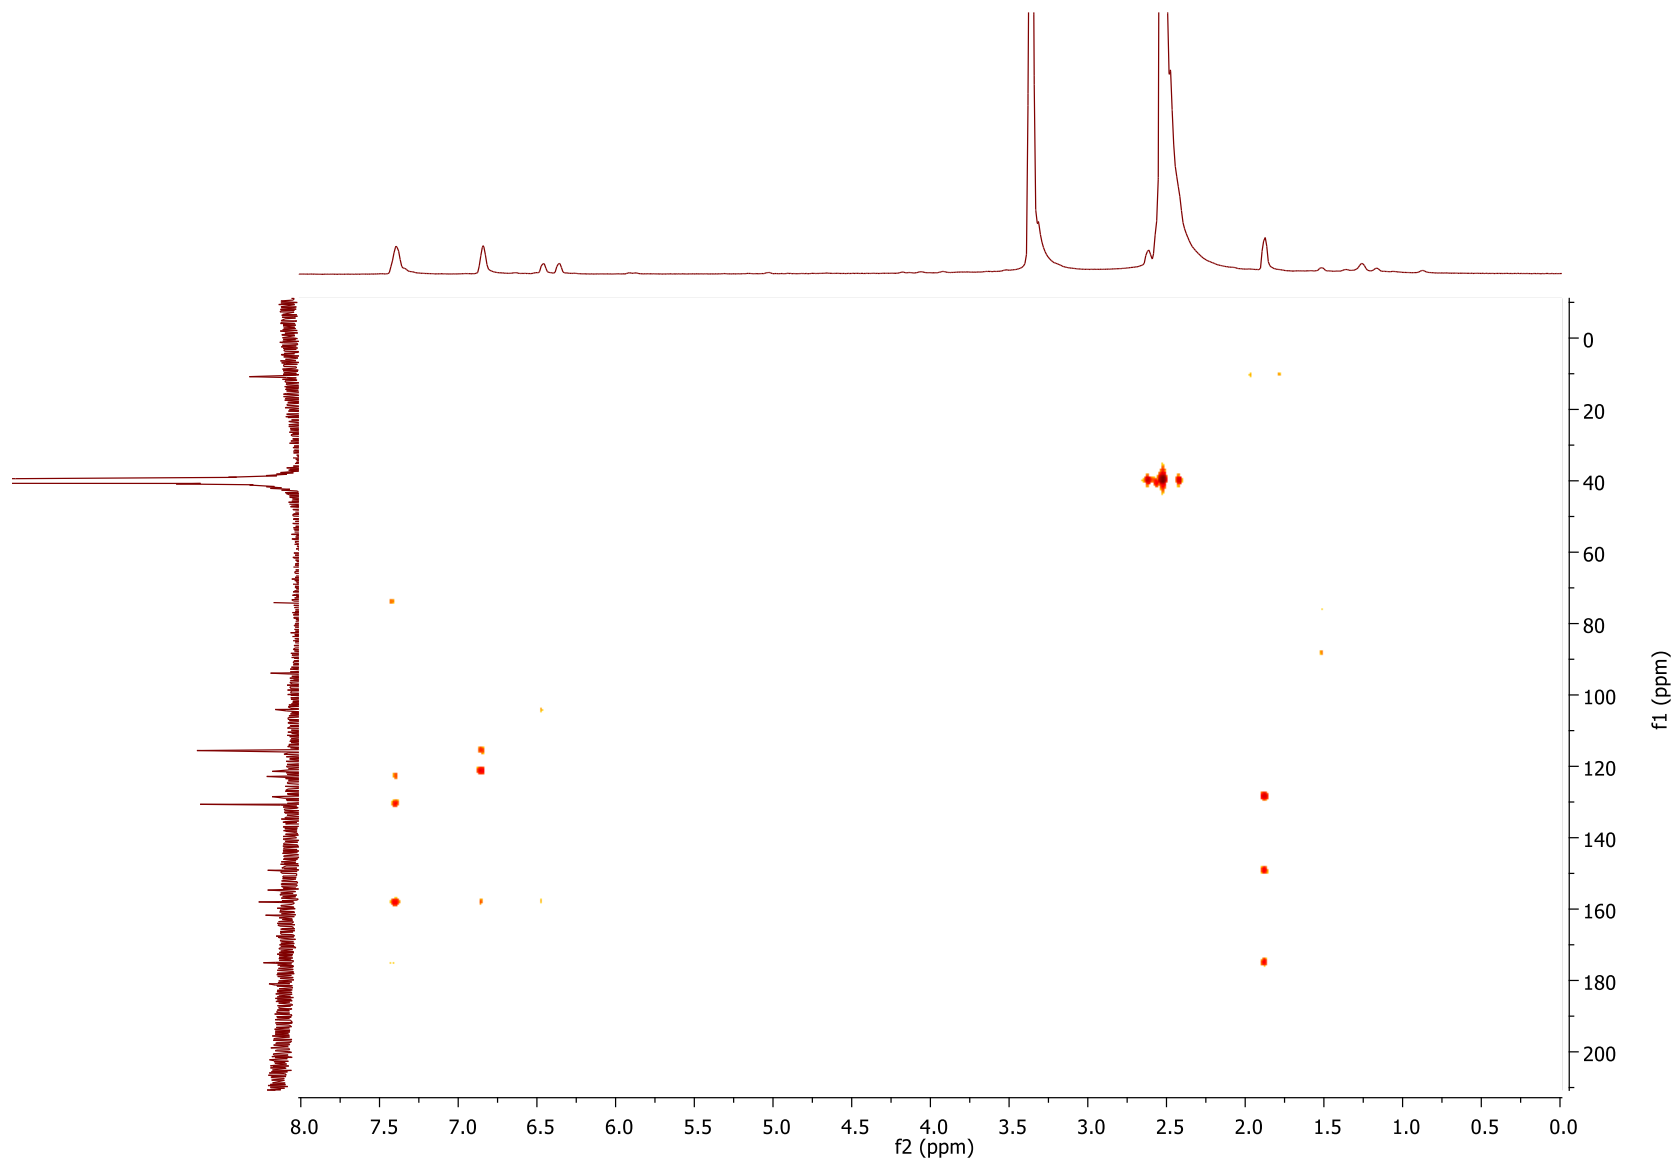

Fig. S51. HMBC spectrum of 7



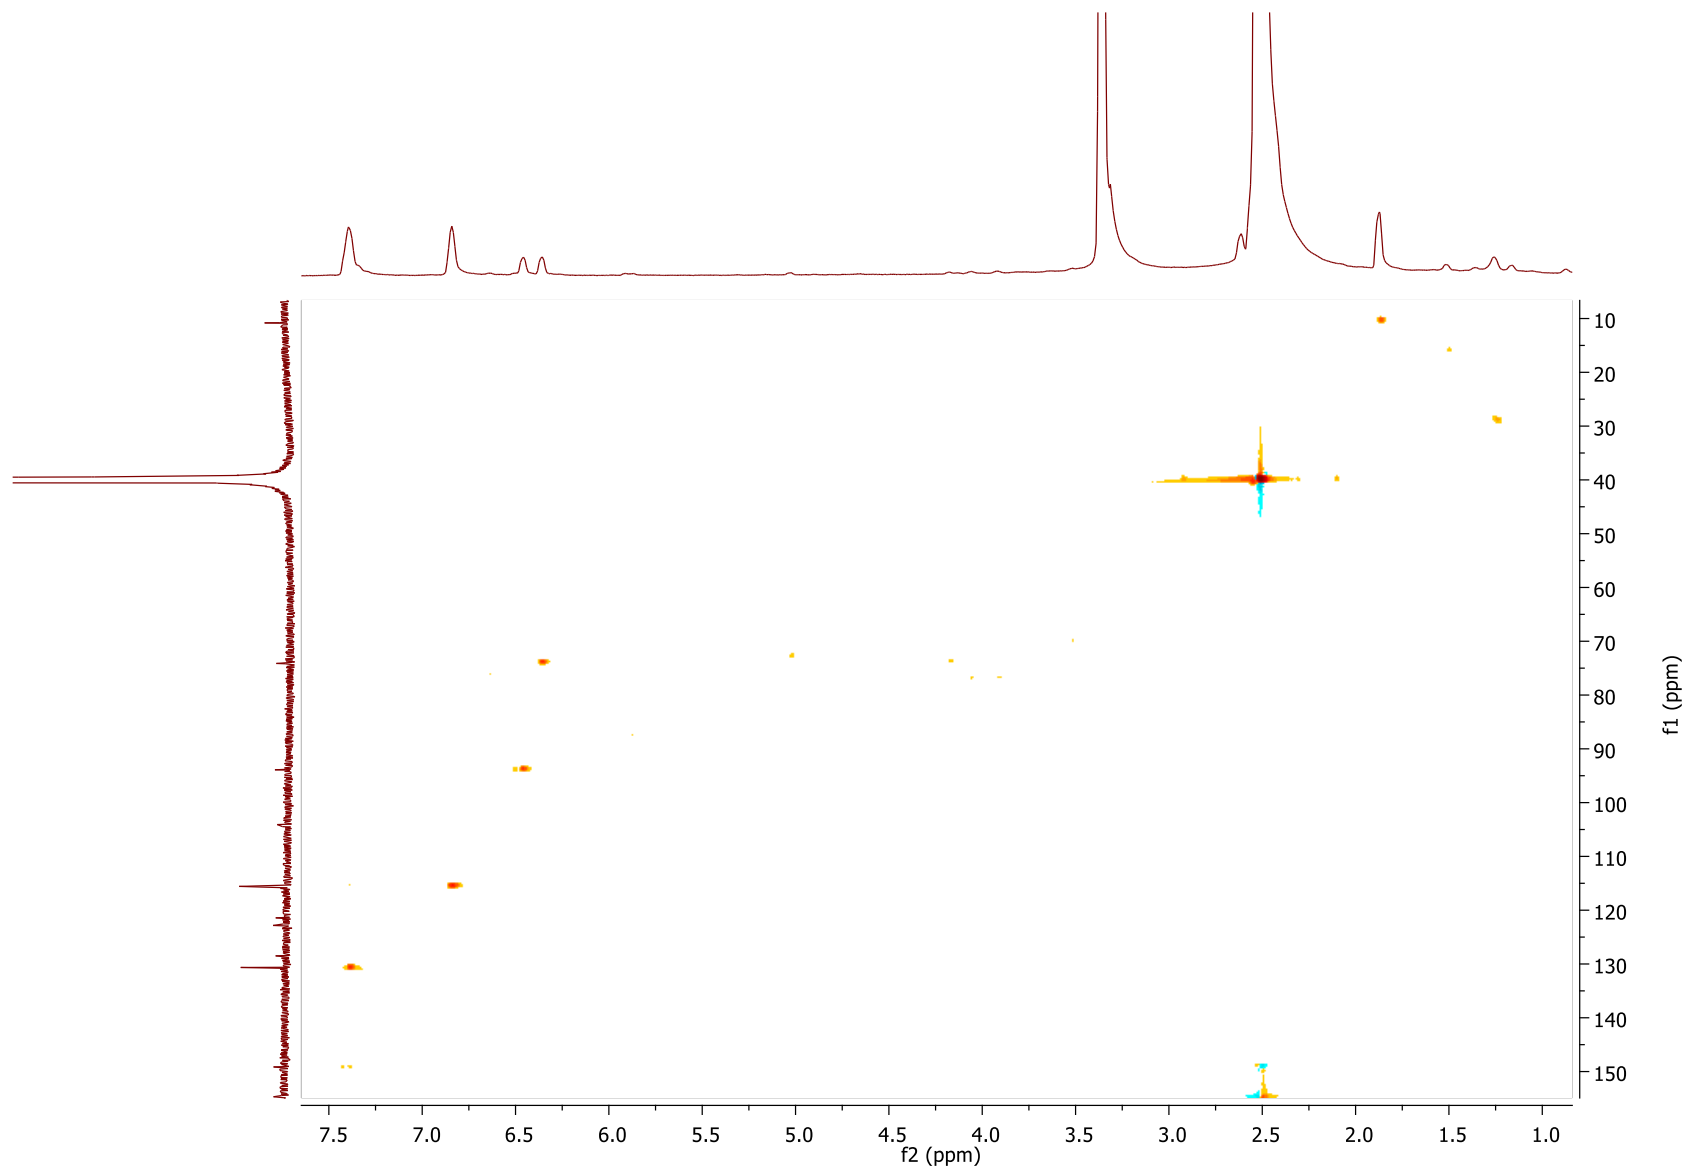

Fig. S52. HSQC spectrum of **7**

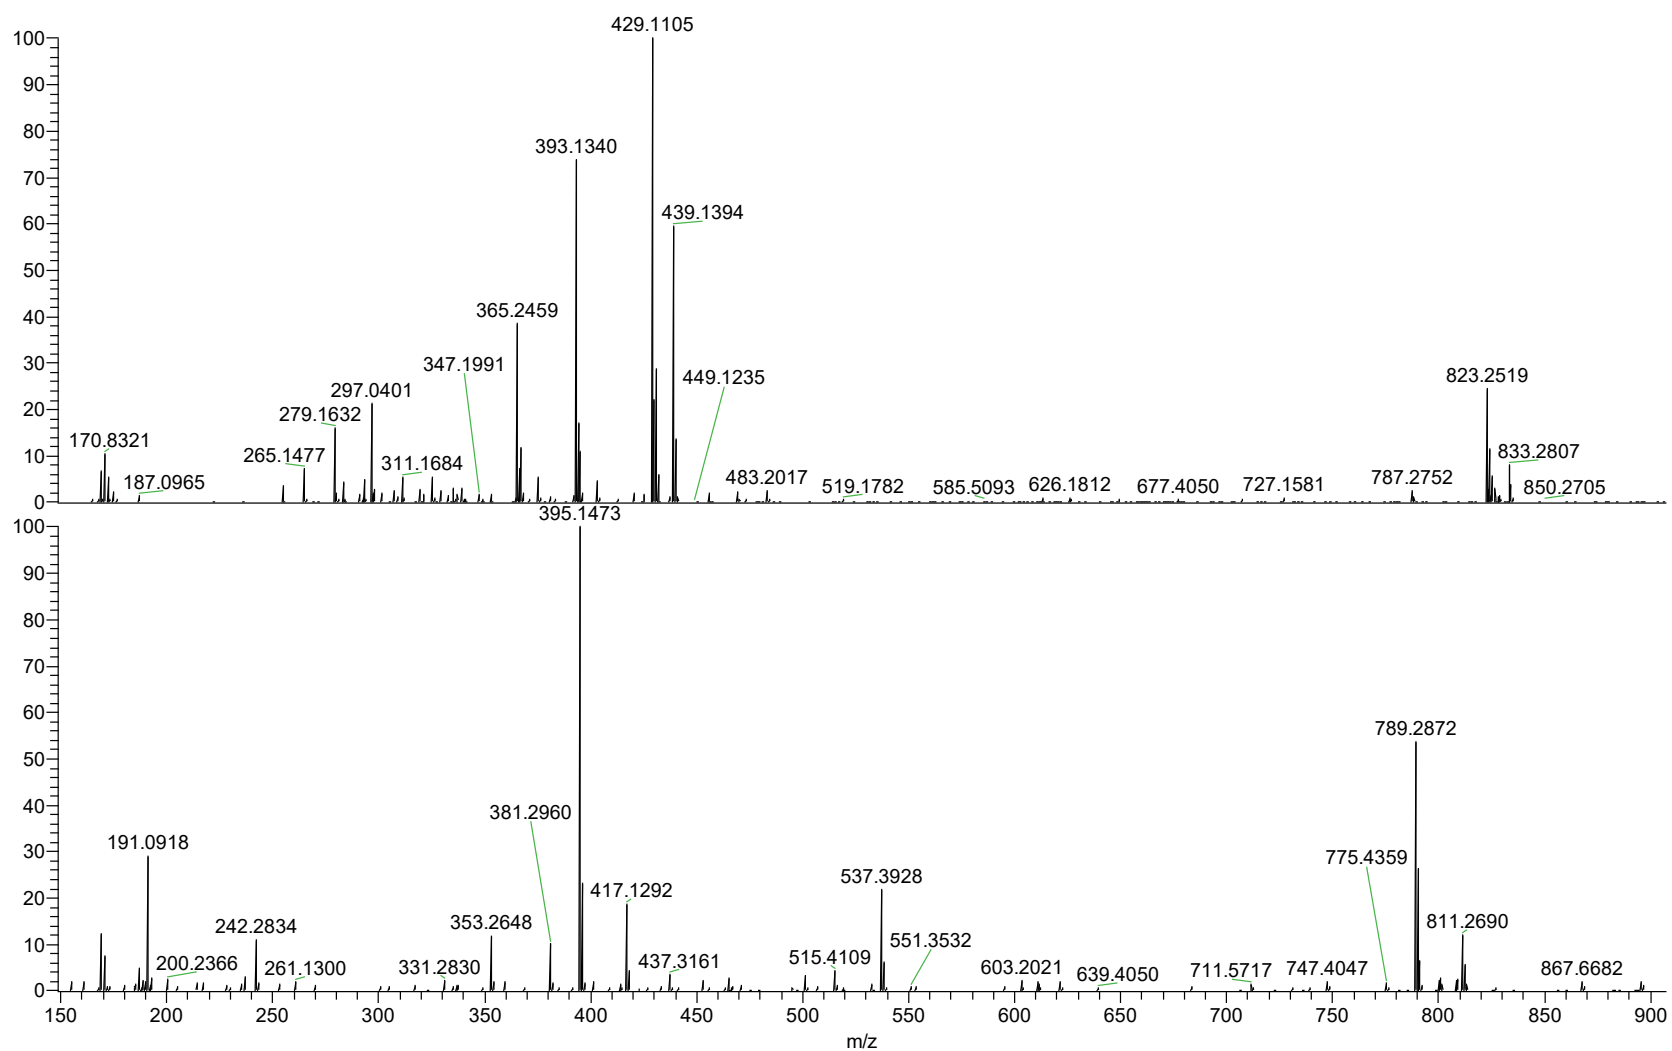

NL: 1.01E8  
R10#183-321 RT:  
1.24-1.81 AV: 23  
T: FTMS - p NSI  
Full ms  
[113.40-1700.00]

NL: 1.04E8  
R10#23-128 RT:  
0.18-0.81 AV: 27  
T: FTMS + p NSI  
Full ms  
[113.40-1700.00]

Fig. S53. HRMS of 8

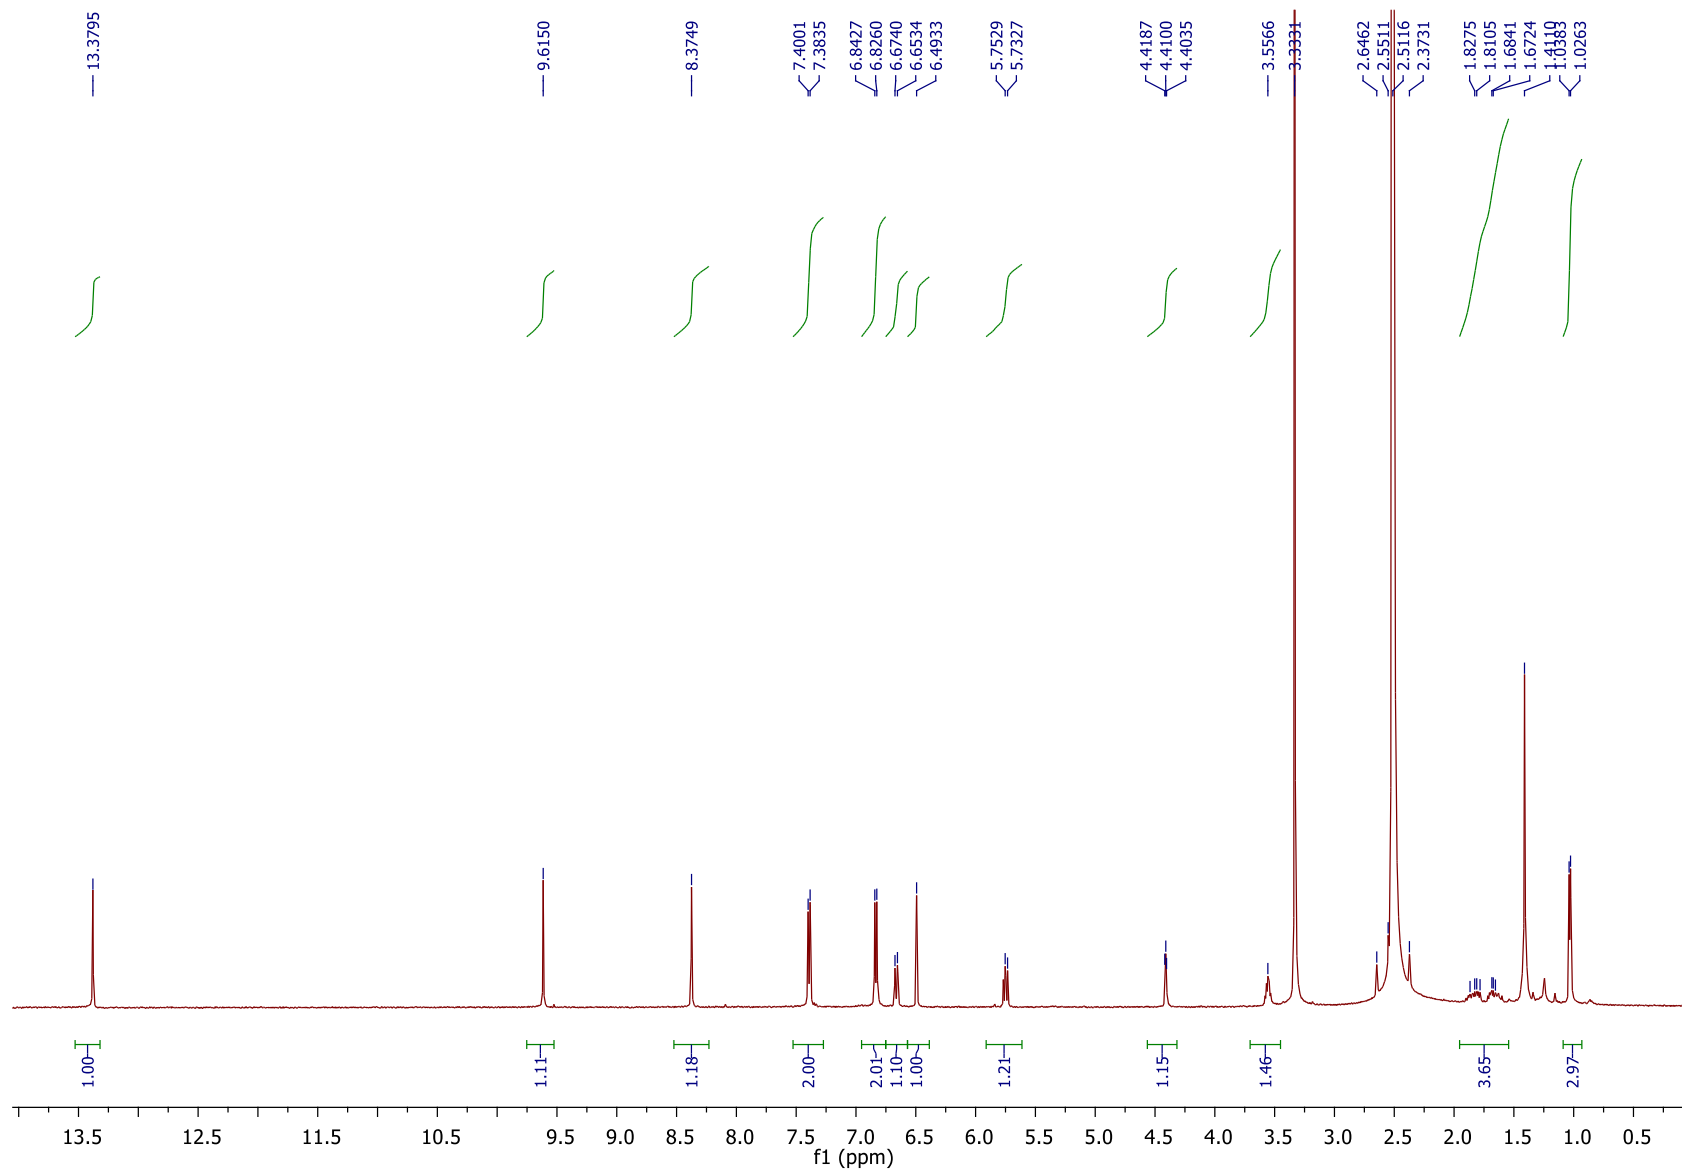

Fig. S54. <sup>1</sup>H NMR spectrum of 8

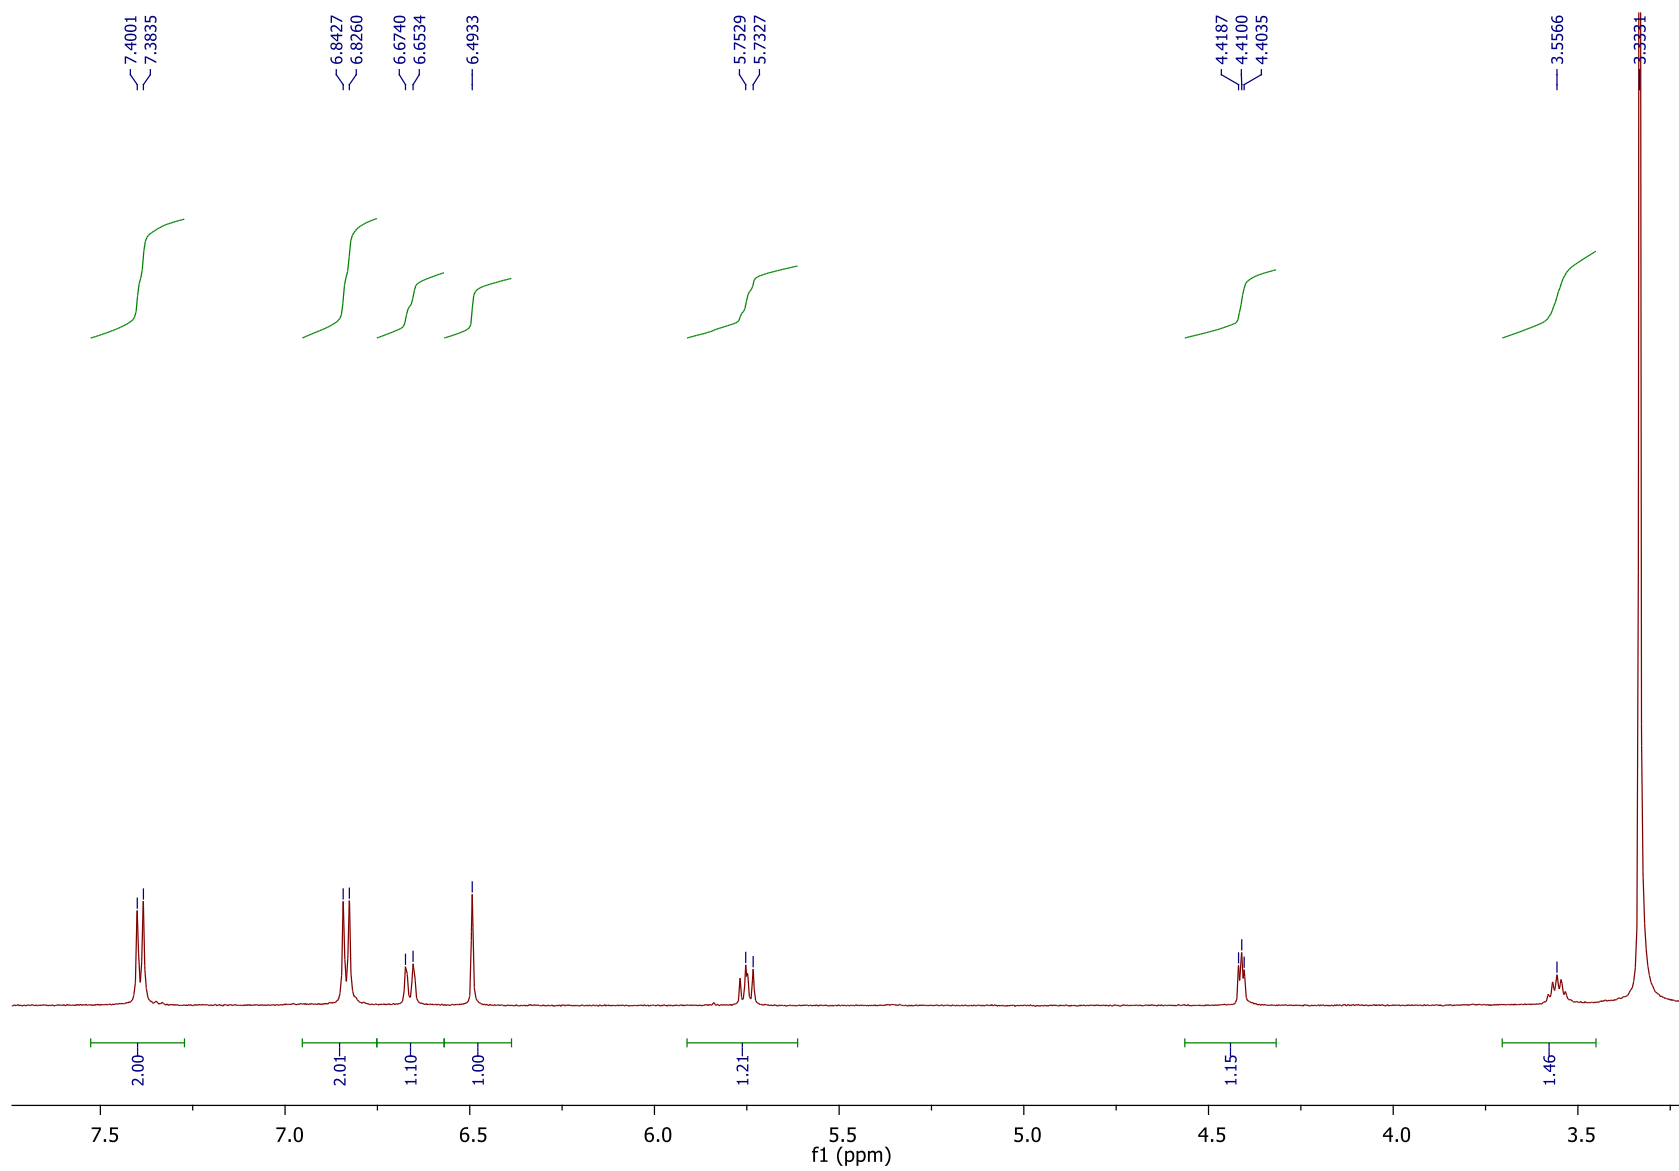

Fig. S55. Expansion A of <sup>1</sup>H NMR spectrum of **8**

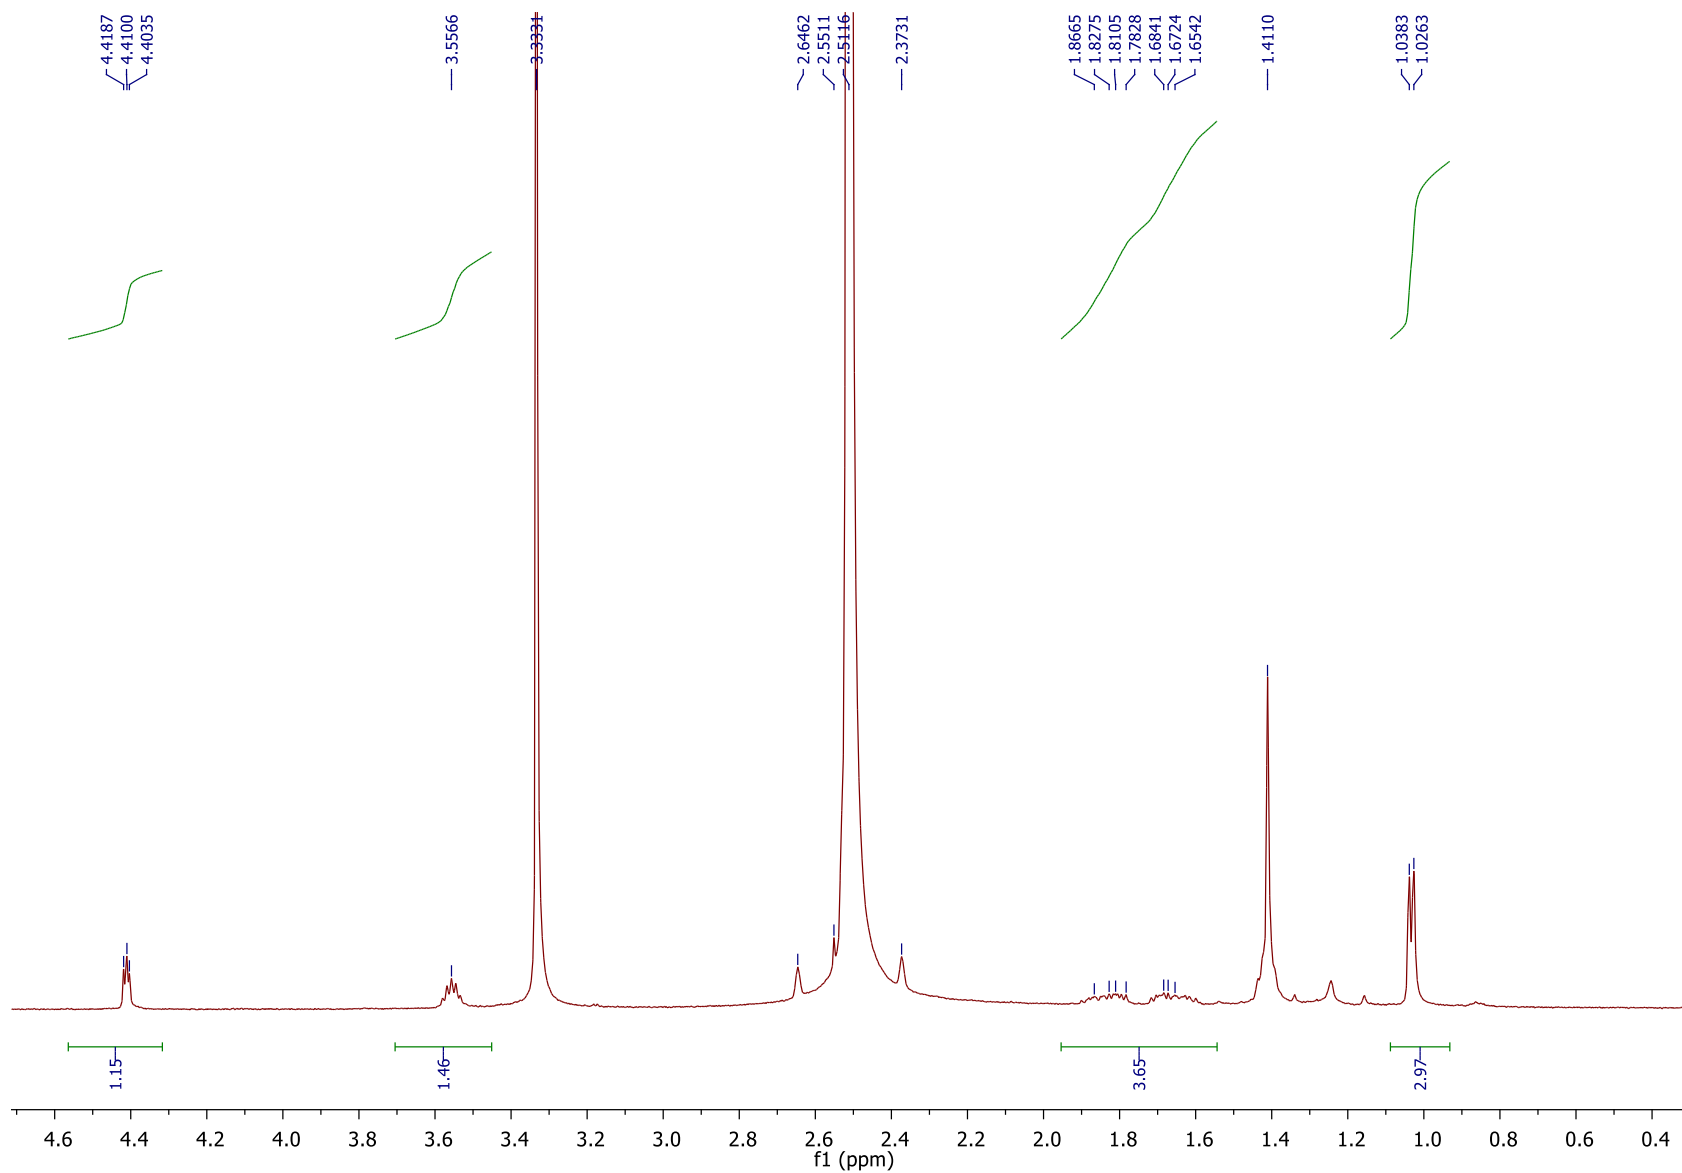

Fig. S56. Expansion B of  $^1\text{H}$  NMR spectrum of **8**

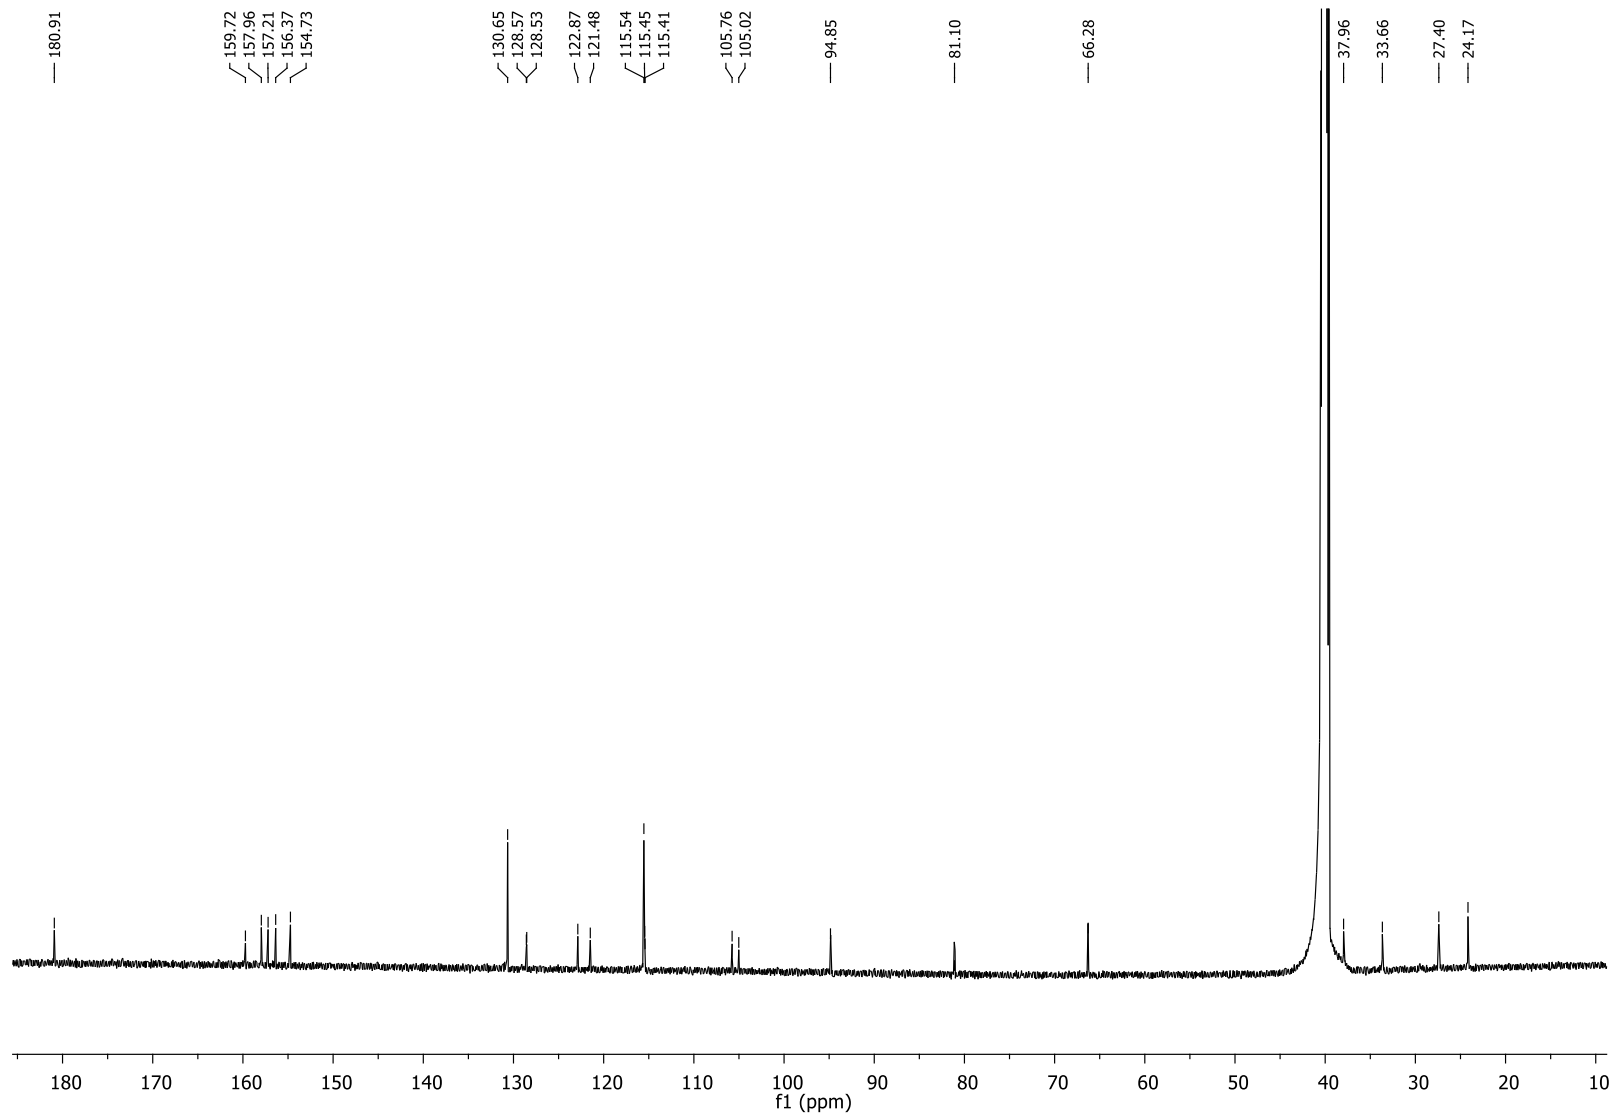

Fig. S57. <sup>13</sup>C NMR spectrum of **8**

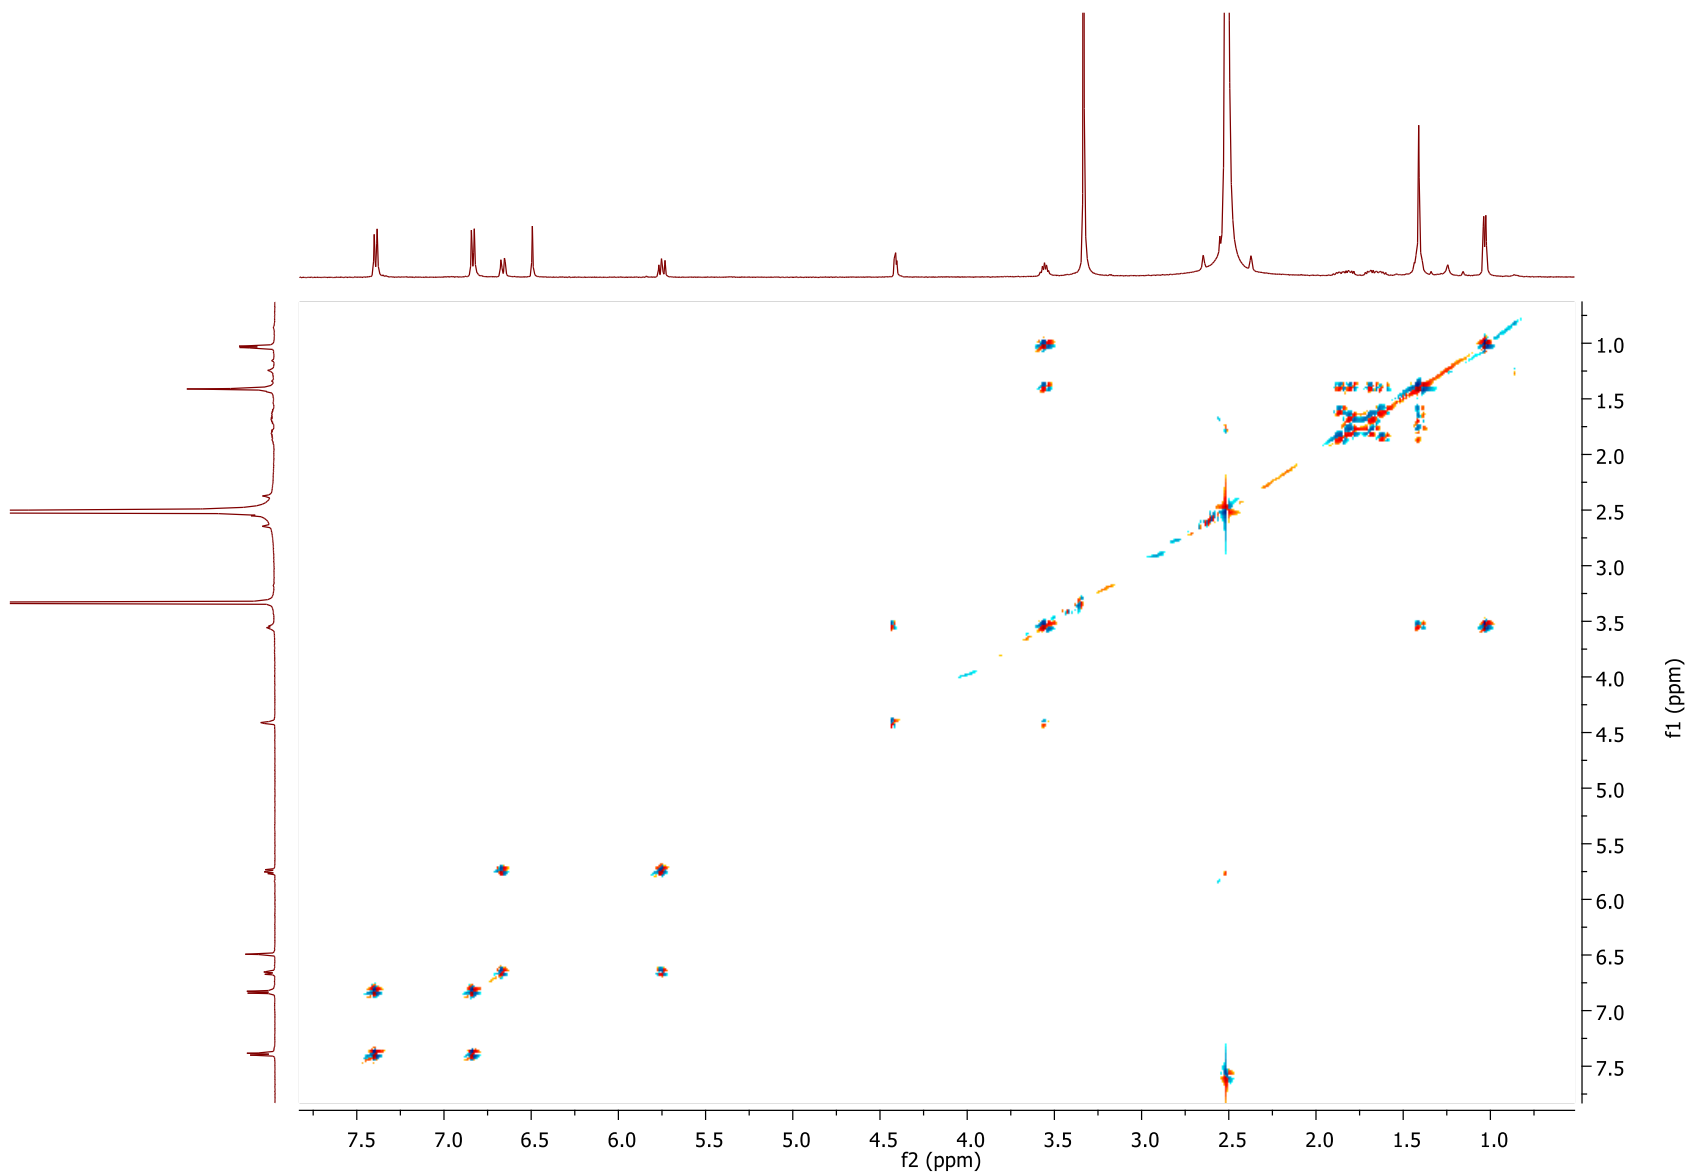

Fig. S58. COSY spectrum of **8**

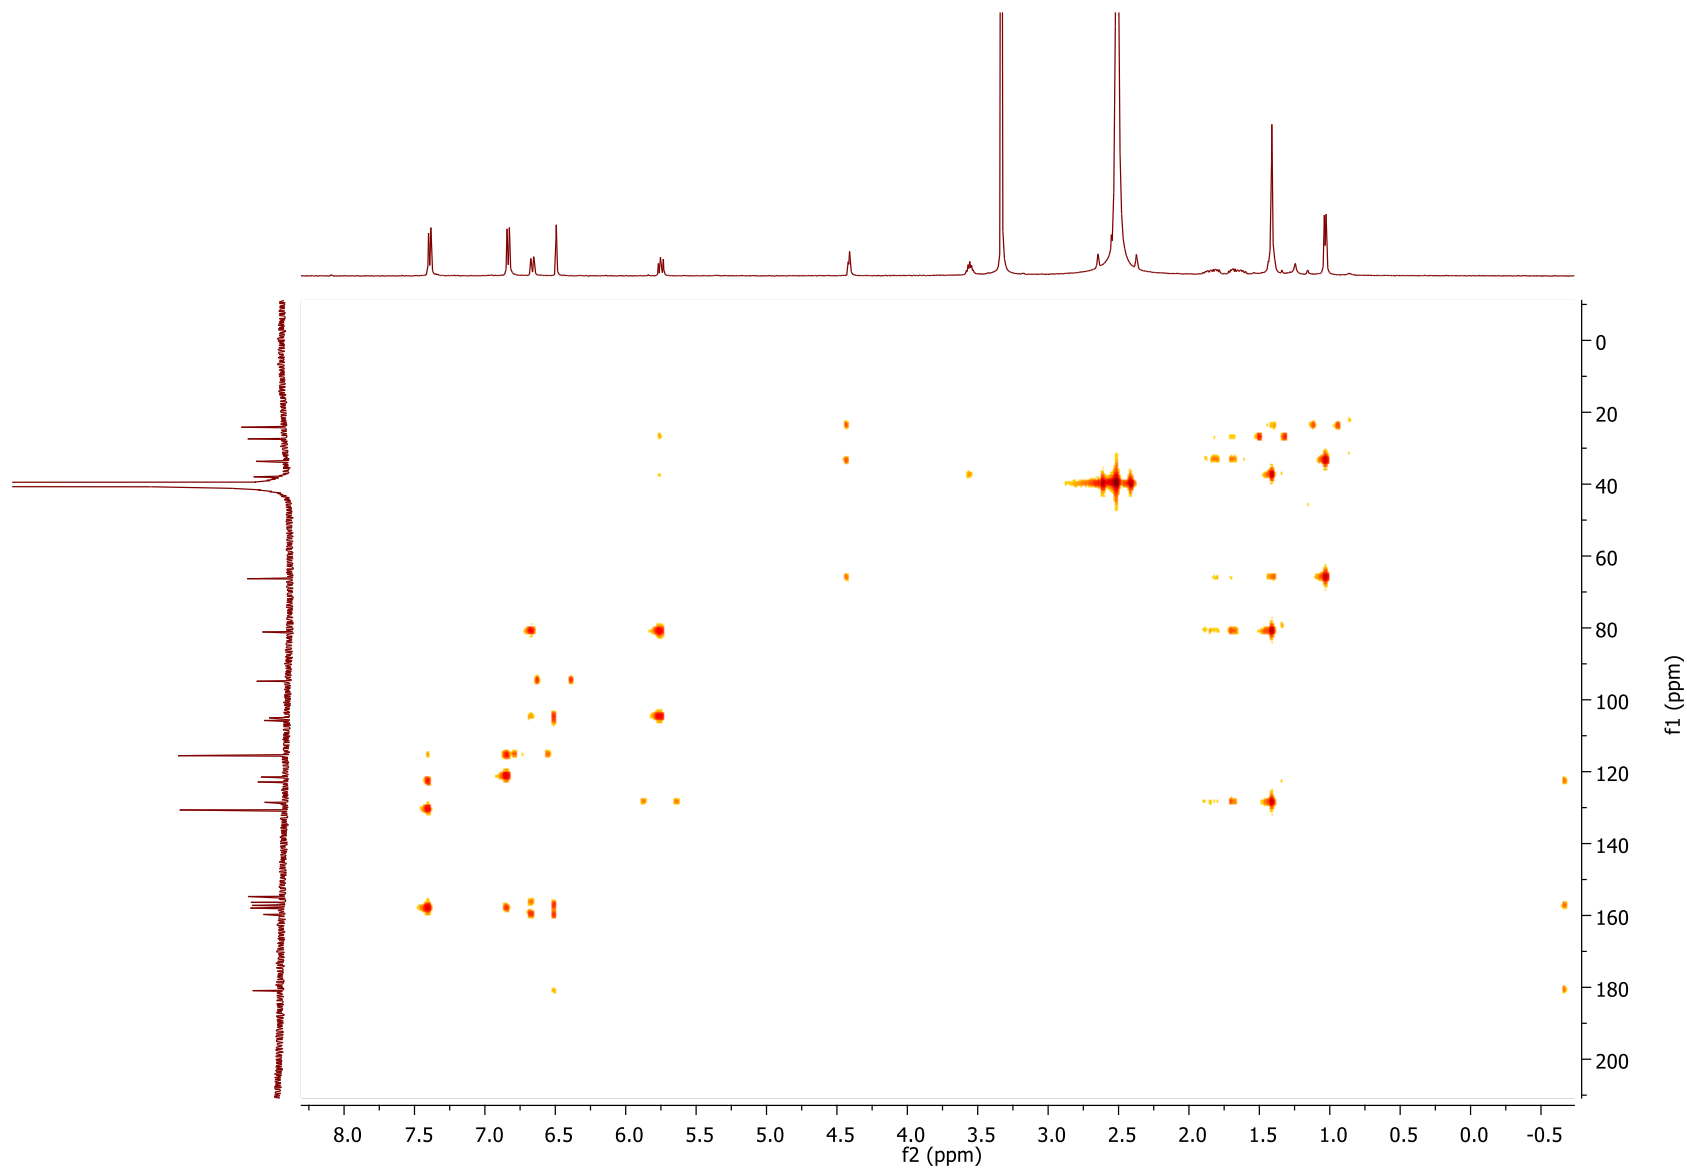

Fig. S59. HMBC spectrum of 8



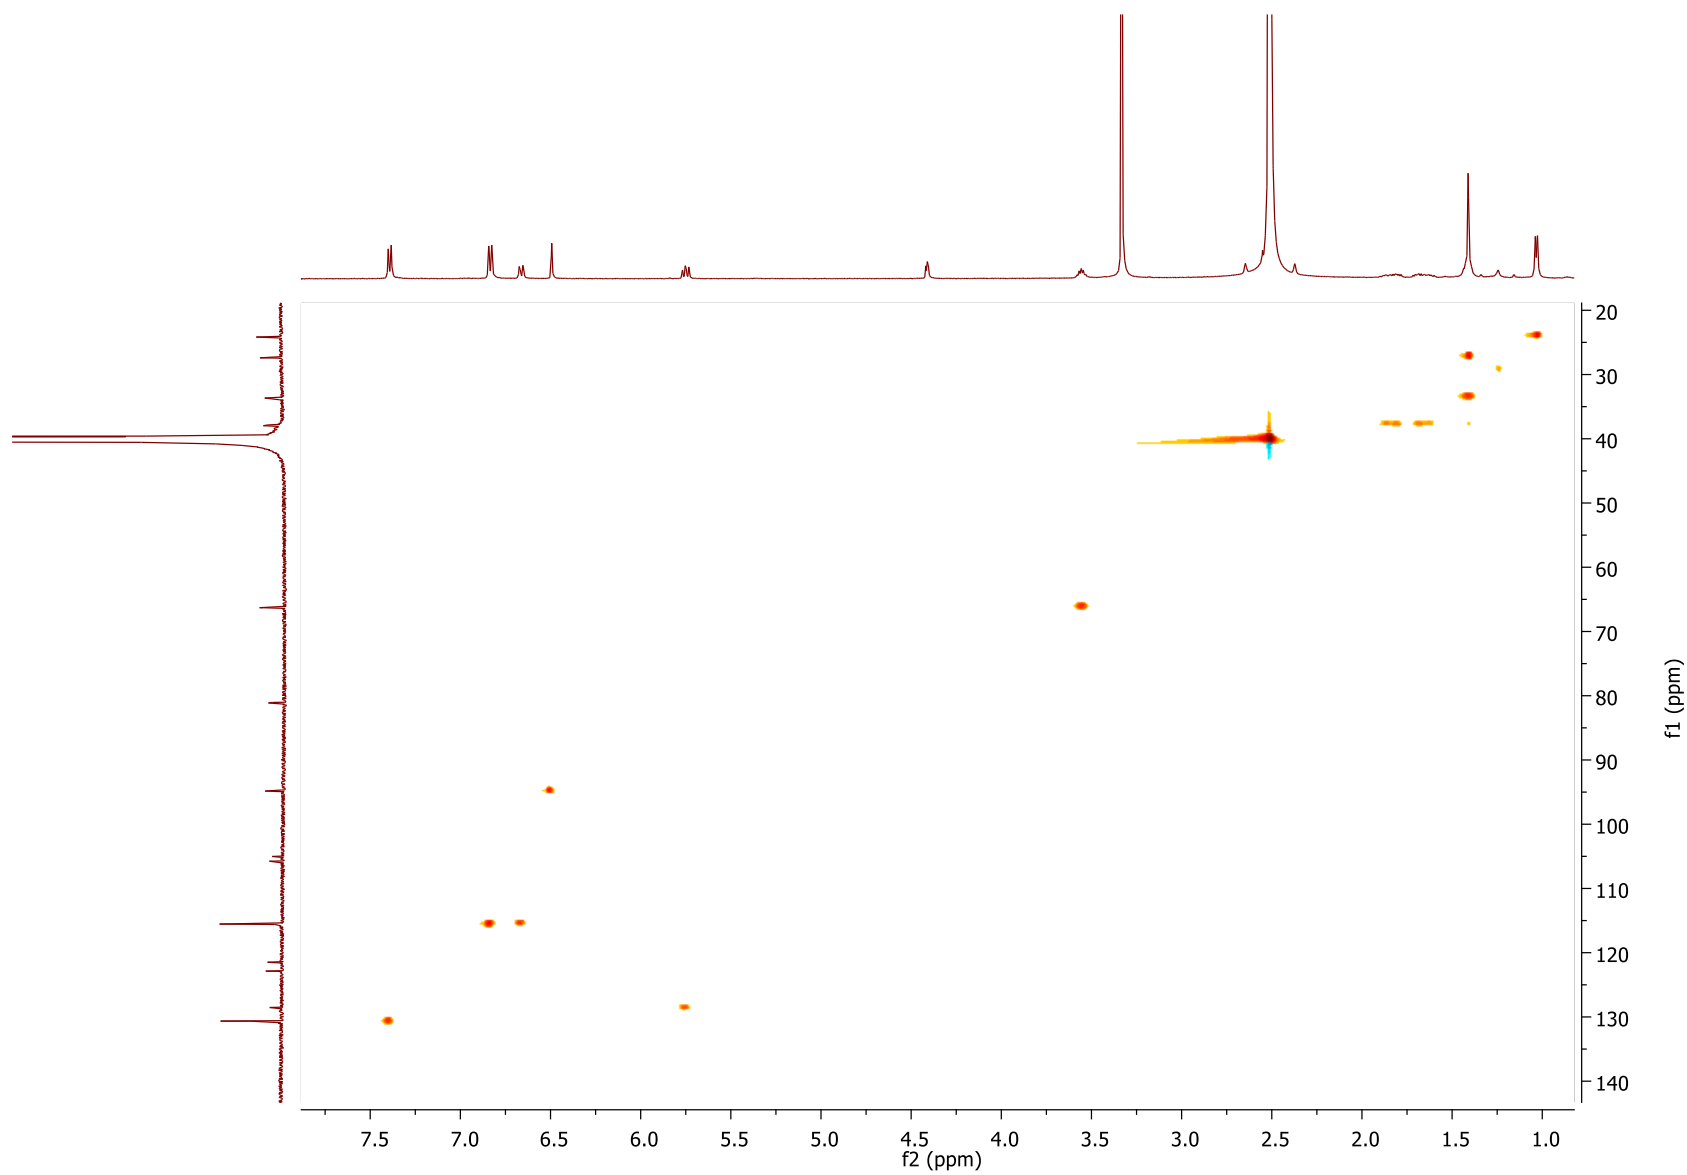

Fig. S60. HSQC spectrum of **8**

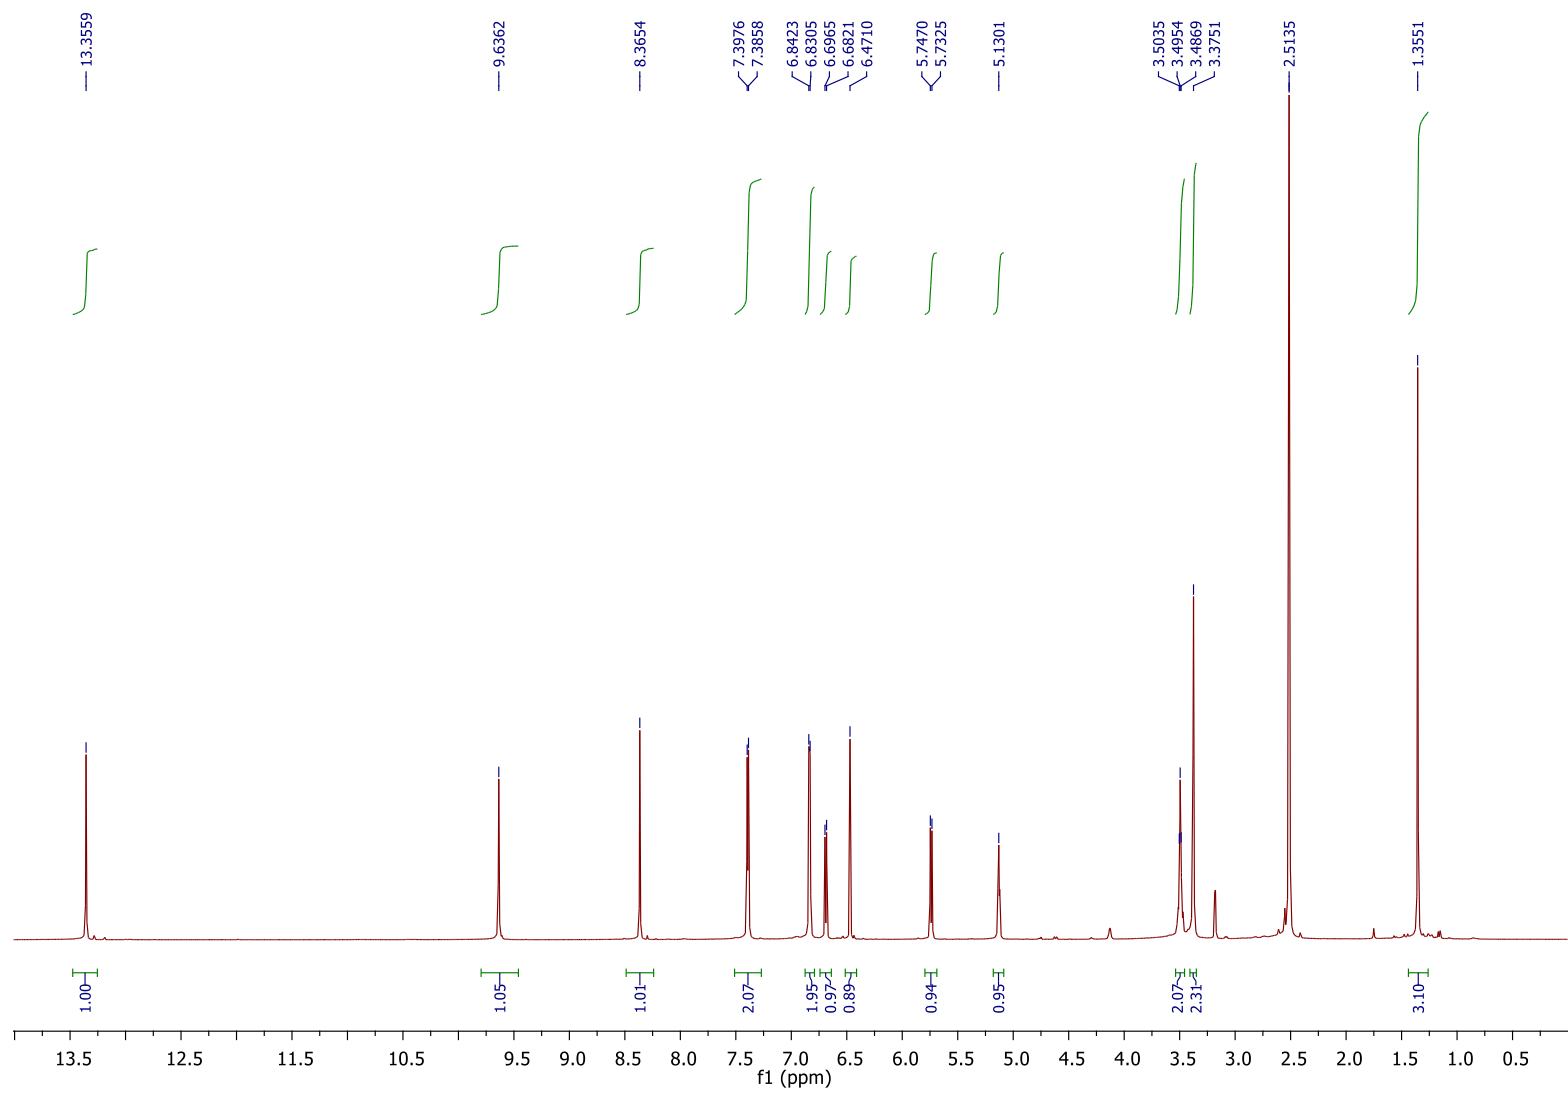

Fig. S61. <sup>1</sup>H NMR spectrum of 9

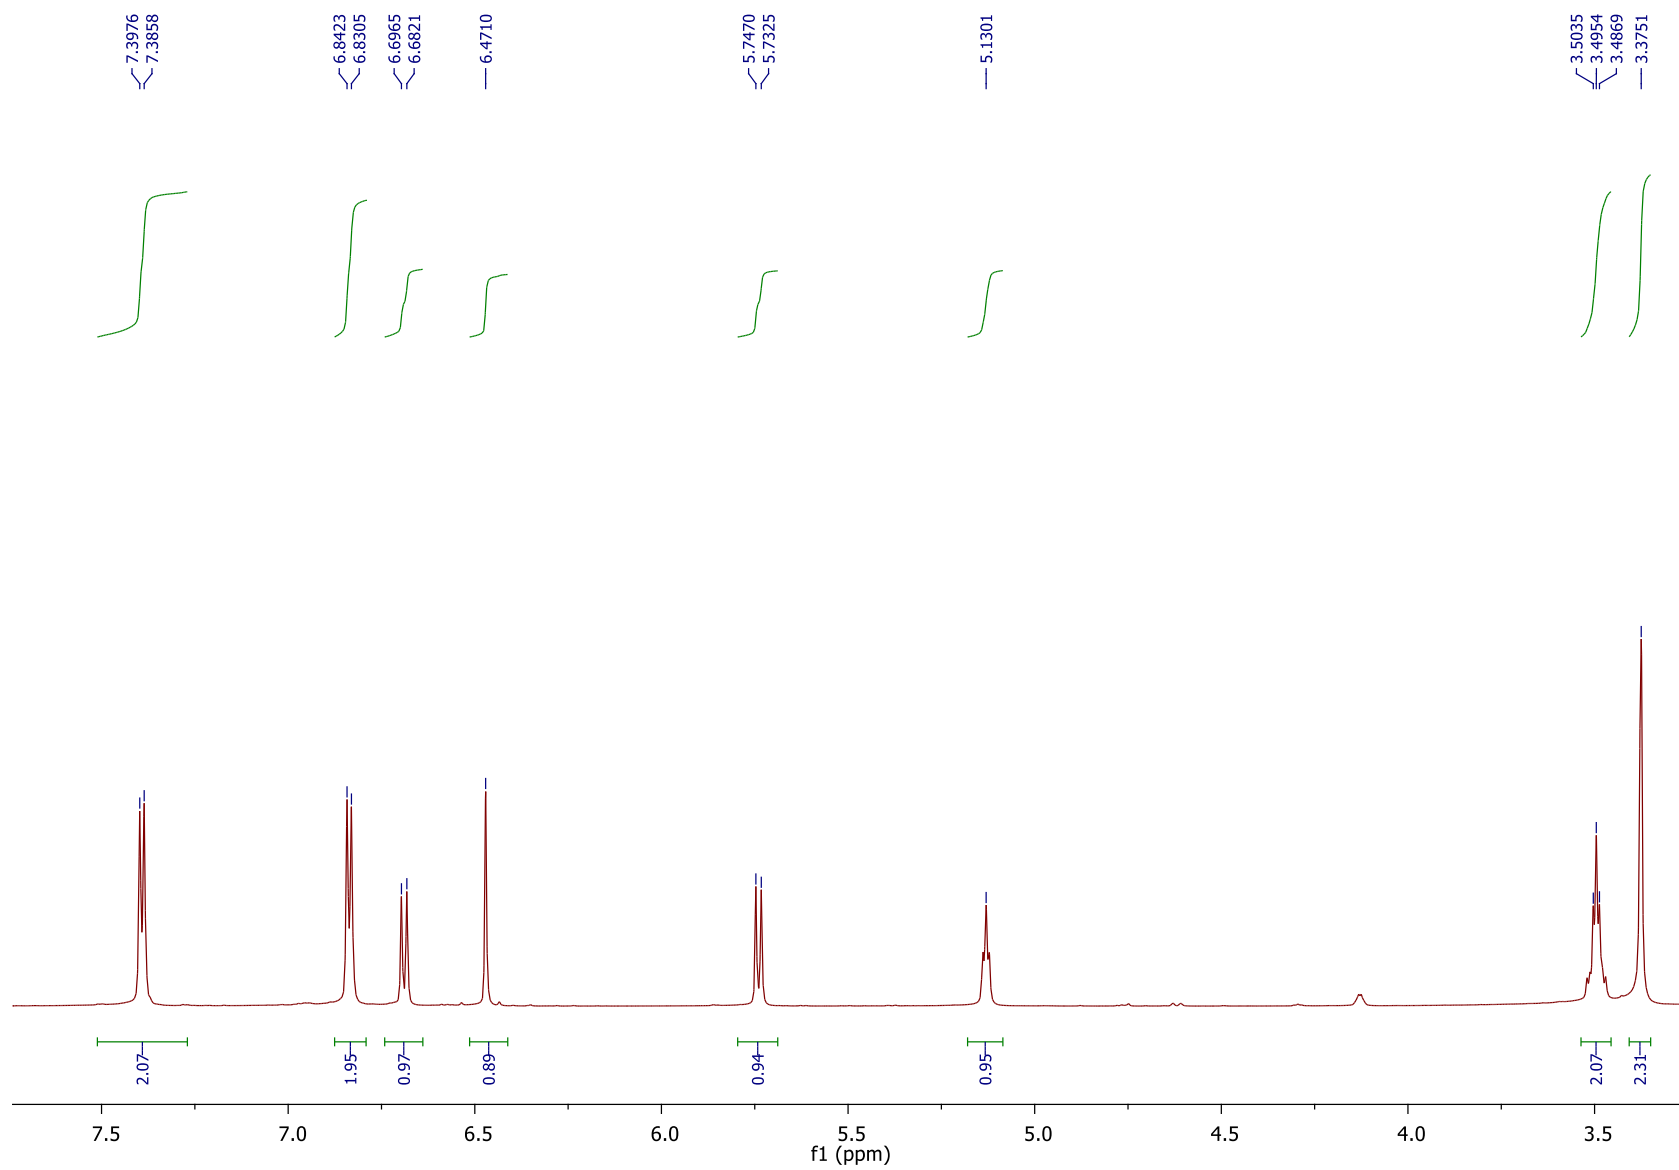

**Fig. S62.** Expansion of  $^1\text{H}$  NMR spectrum of **9**

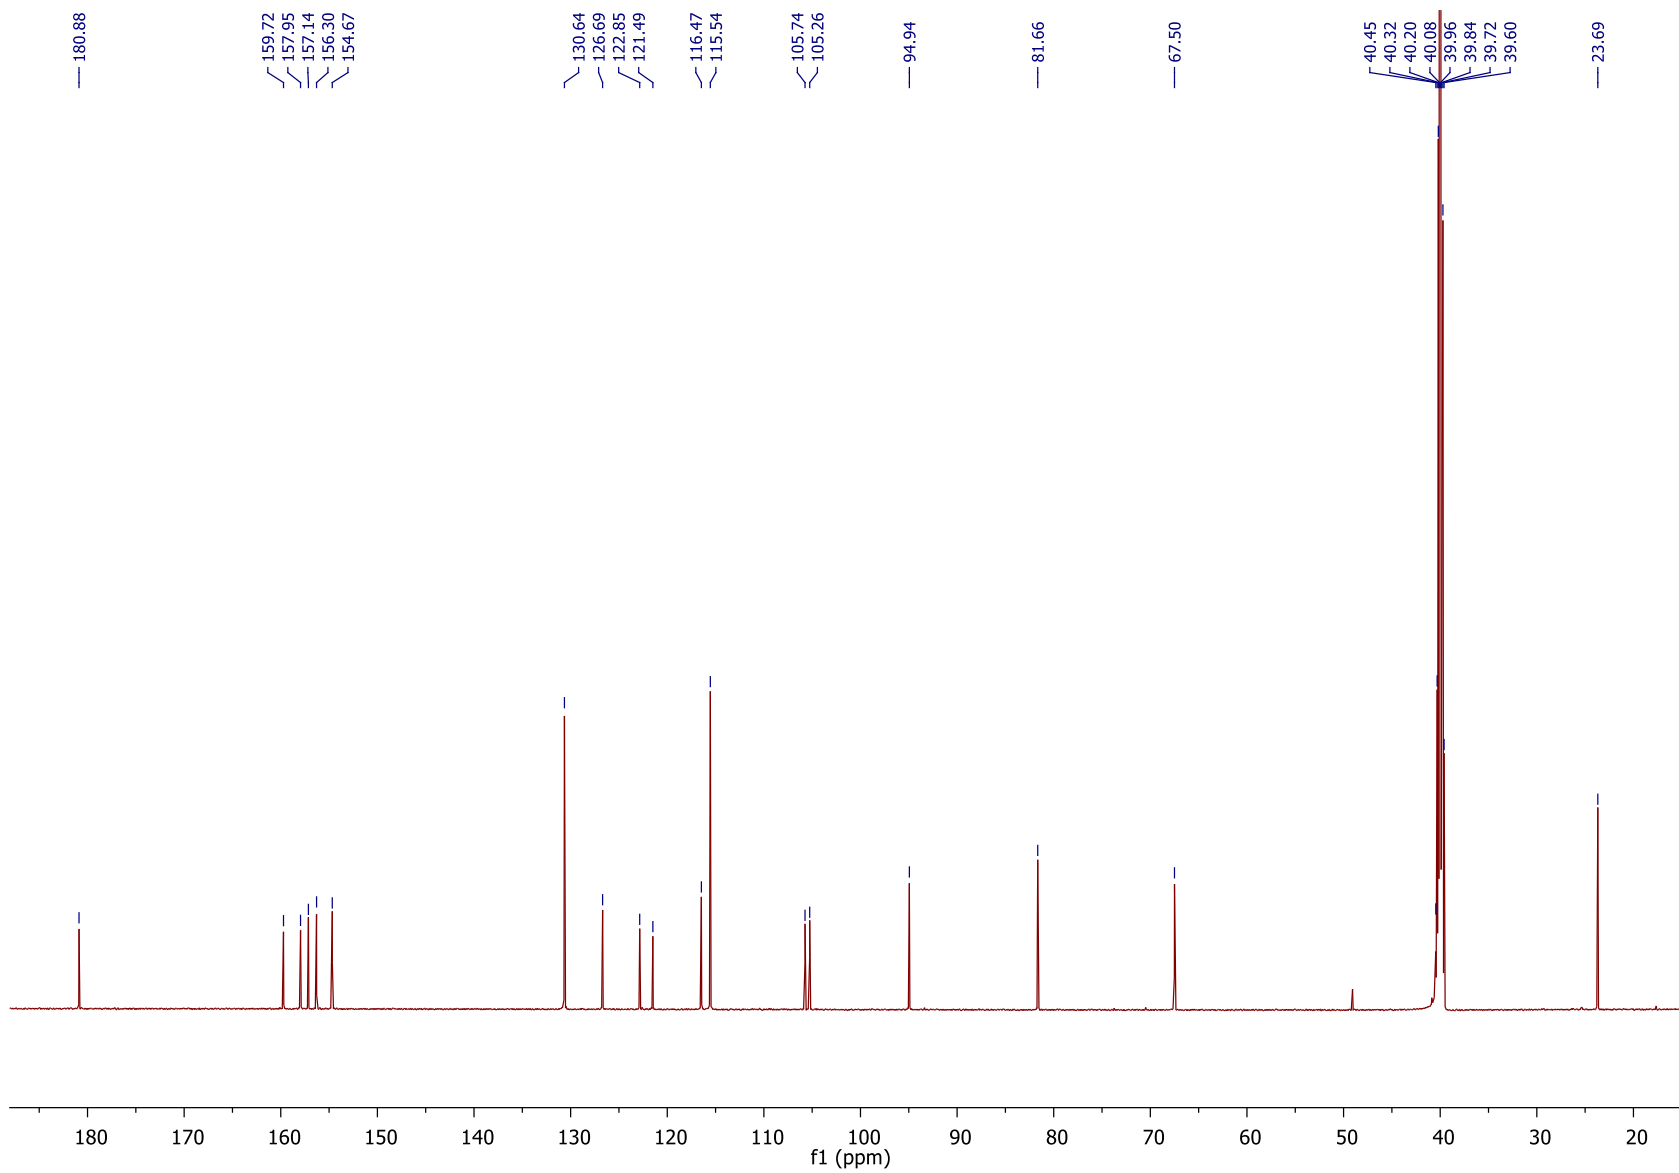

Fig. S63.  $^{13}\text{C}$  NMR spectrum of **9**

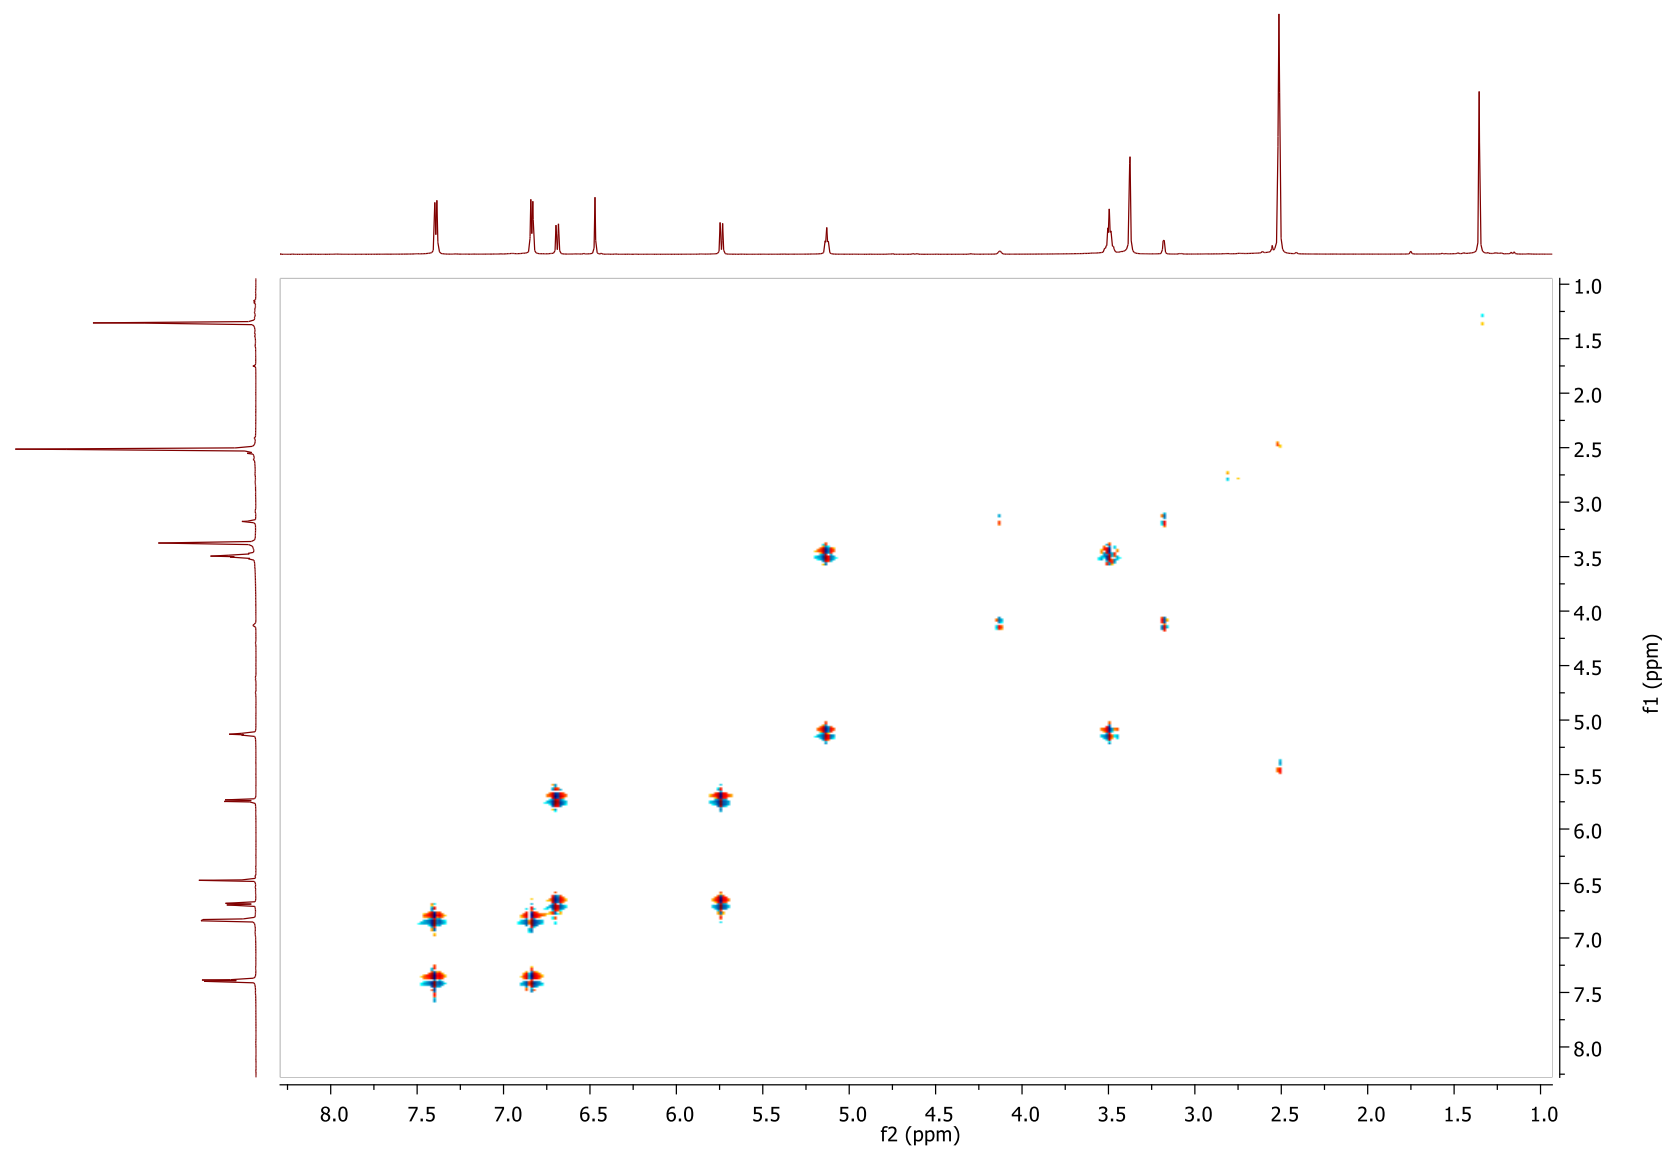

**Fig. S64.** COSY spectrum of **9**

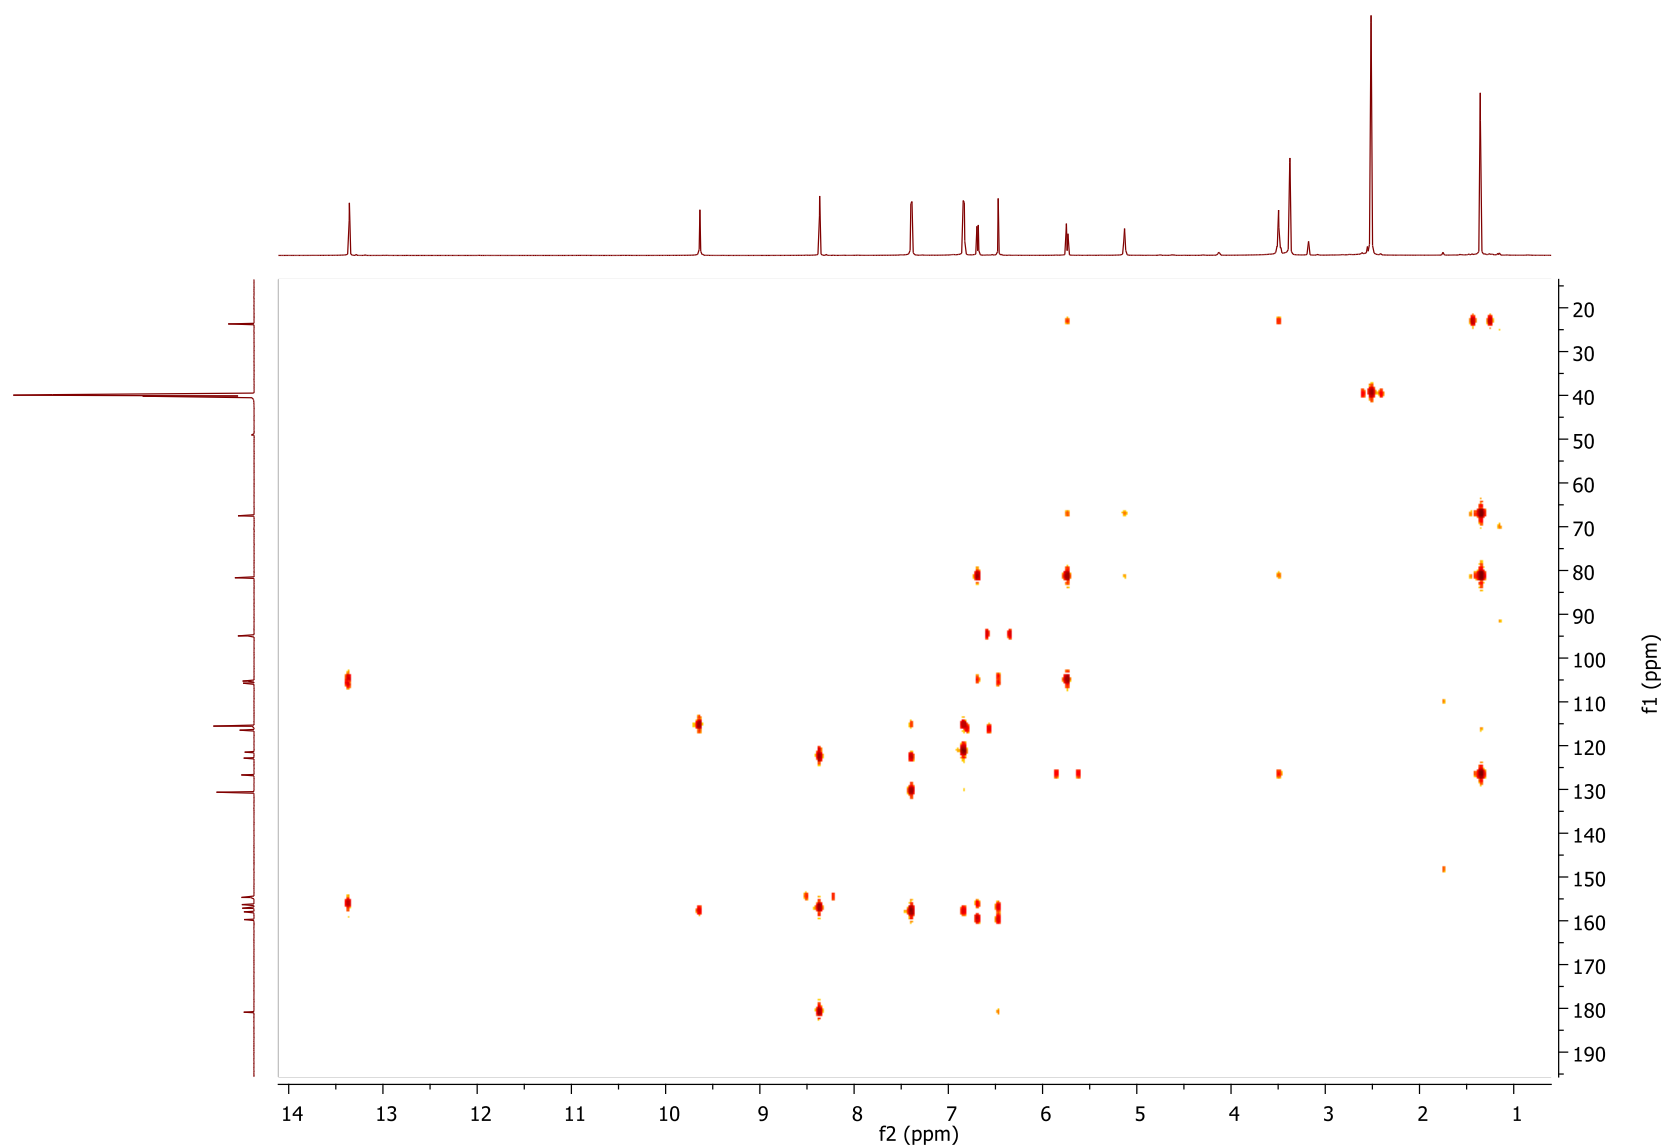

**Fig. S65.** HMBC spectrum of **9**

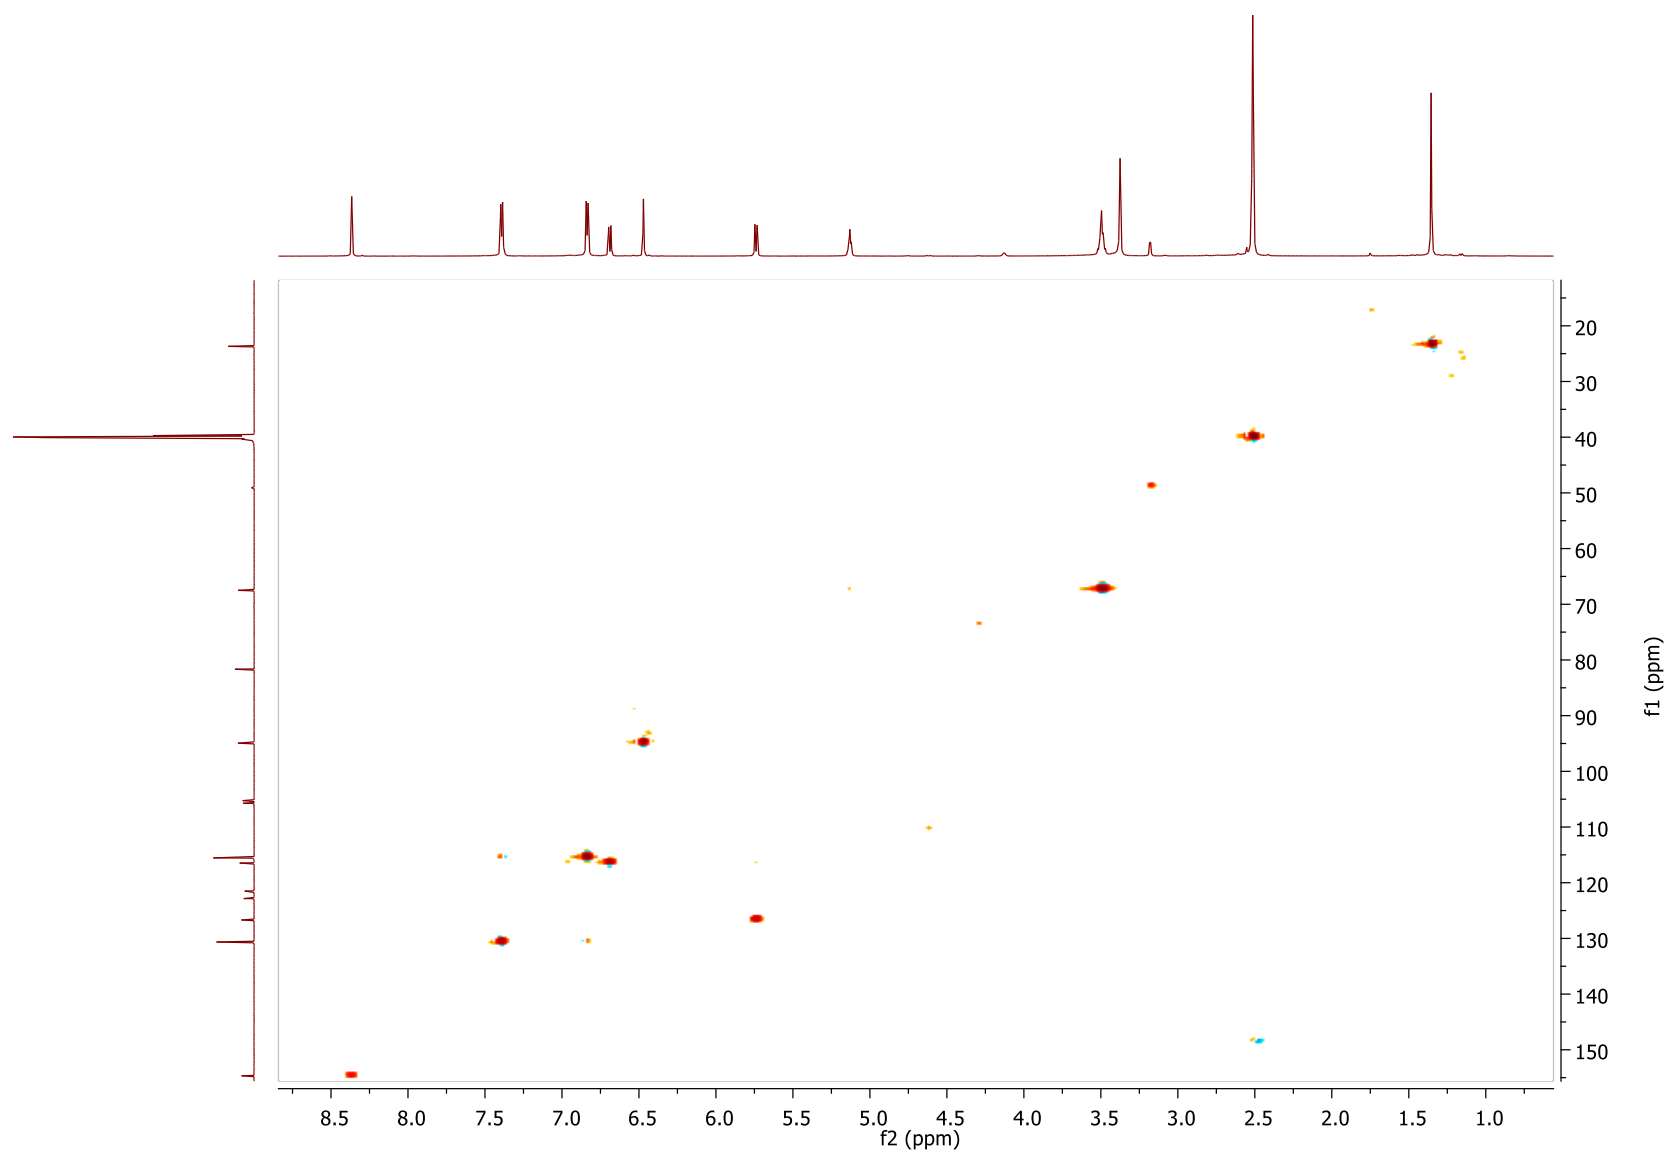

Fig. S66. HSQC spectrum of **9**

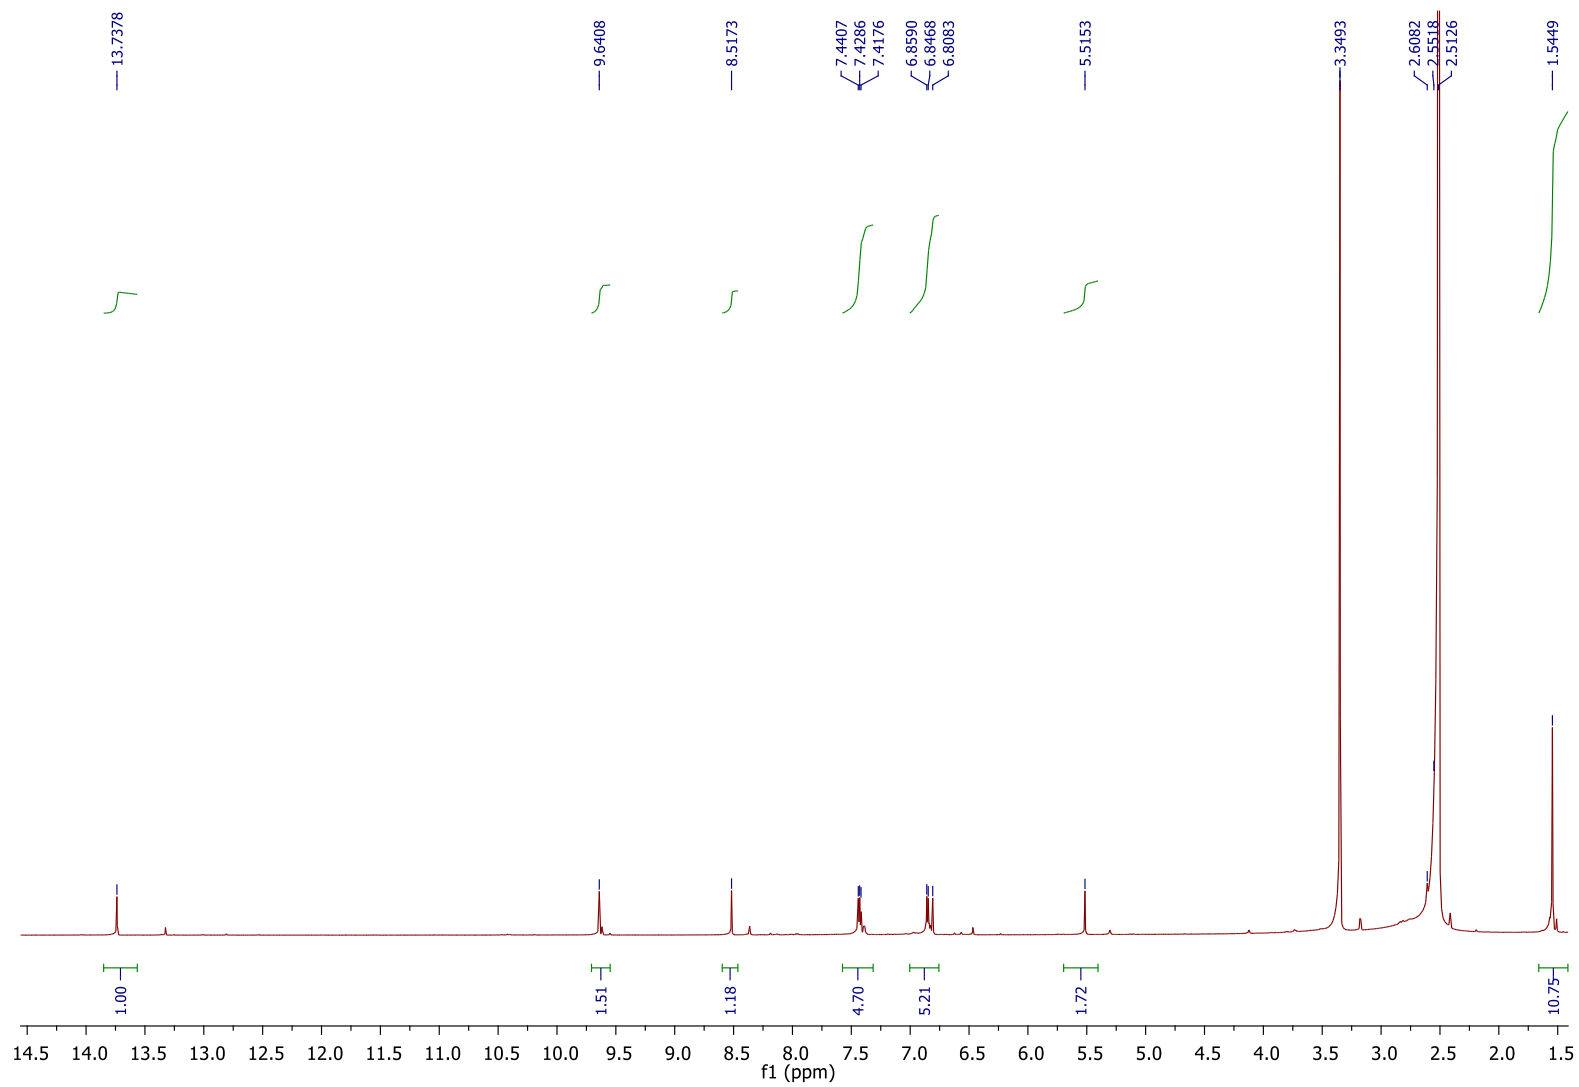

Fig. S67.  $^1\text{H}$  NMR spectrum of **10**



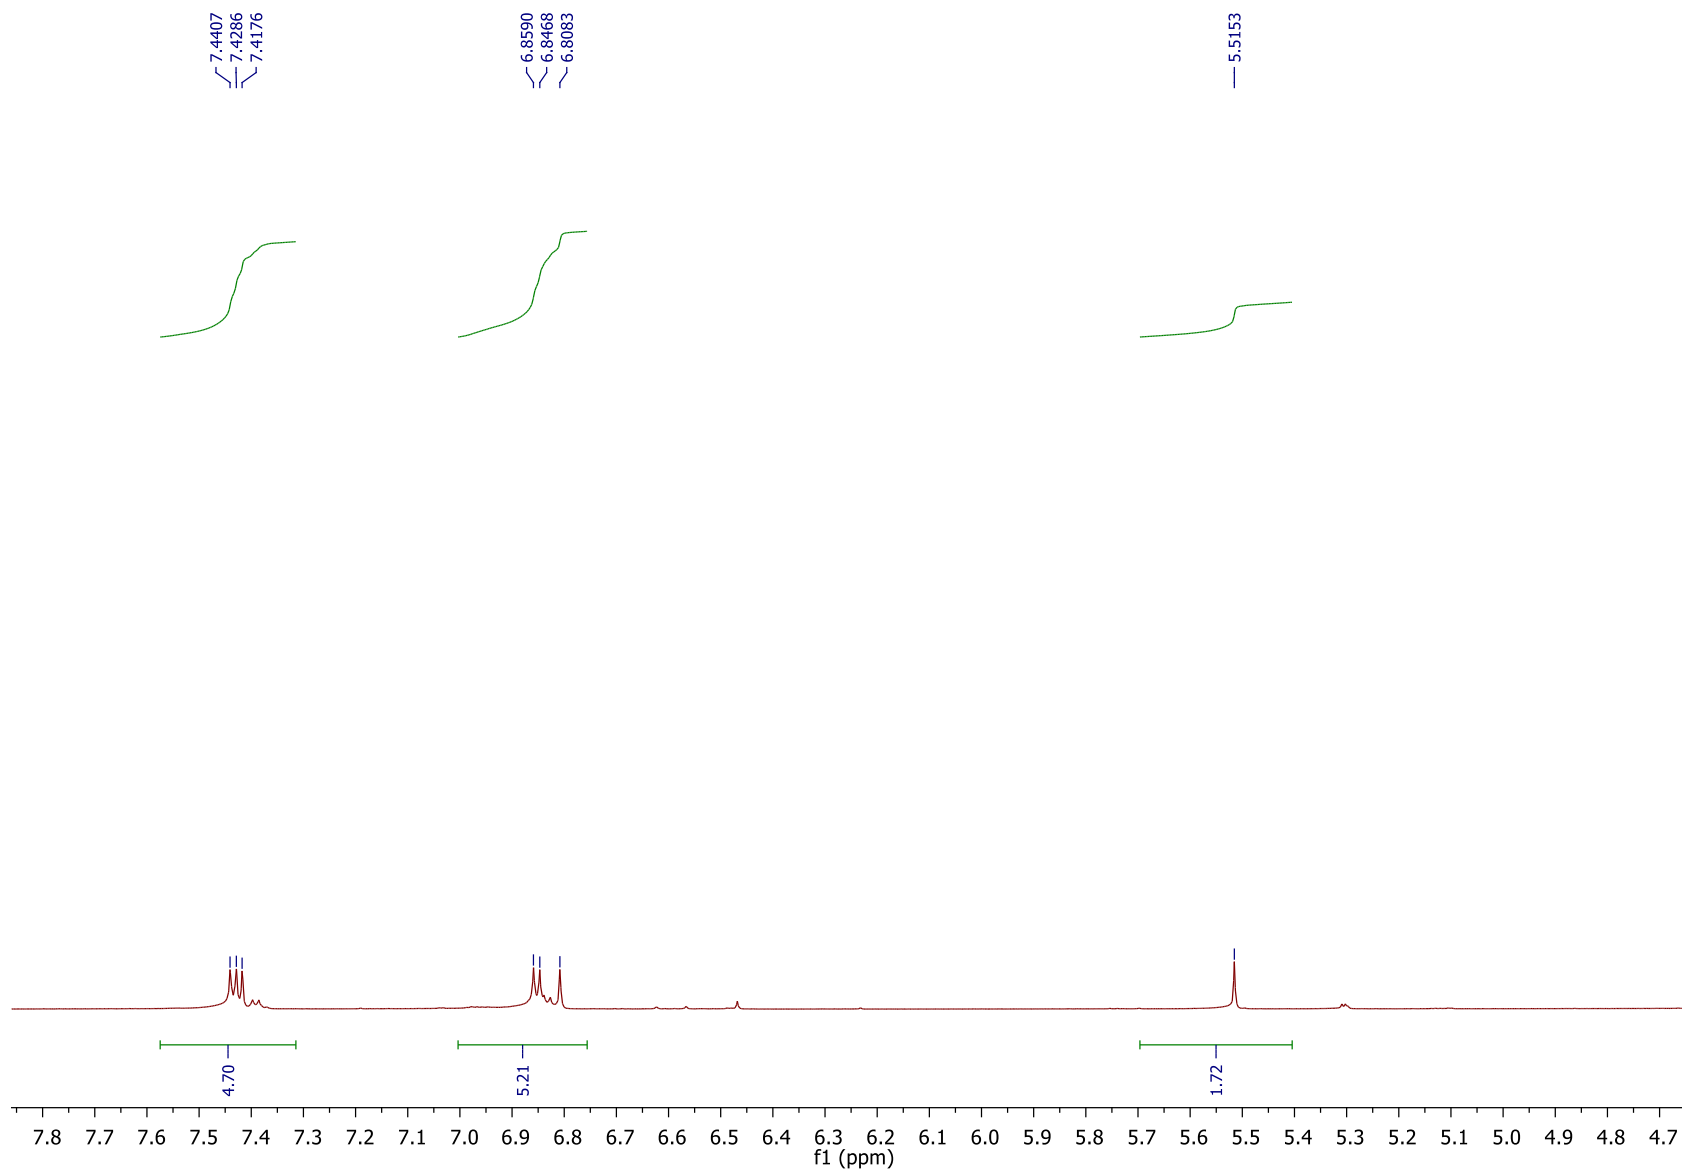

**Fig. S68.** Expansion of  $^1\text{H}$  NMR spectrum of **10**

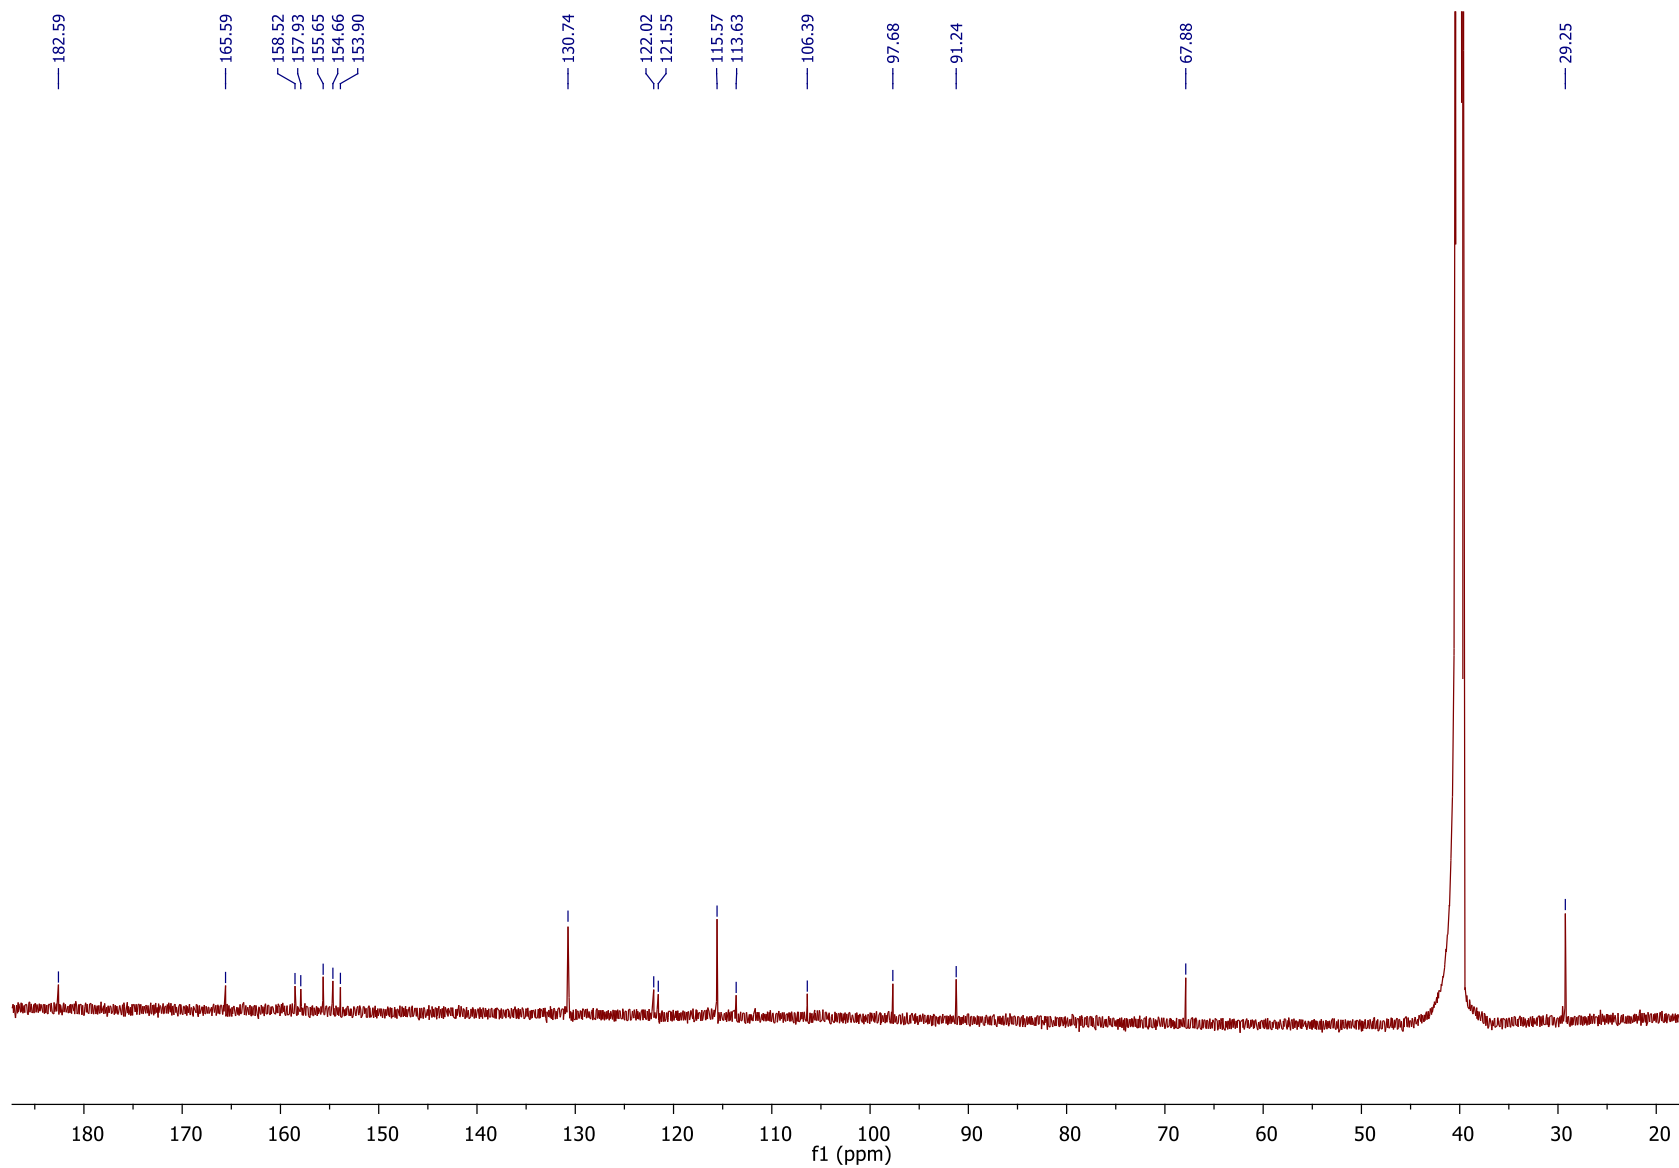

Fig. S69.  $^{13}\text{C}$  NMR spectrum of **10**

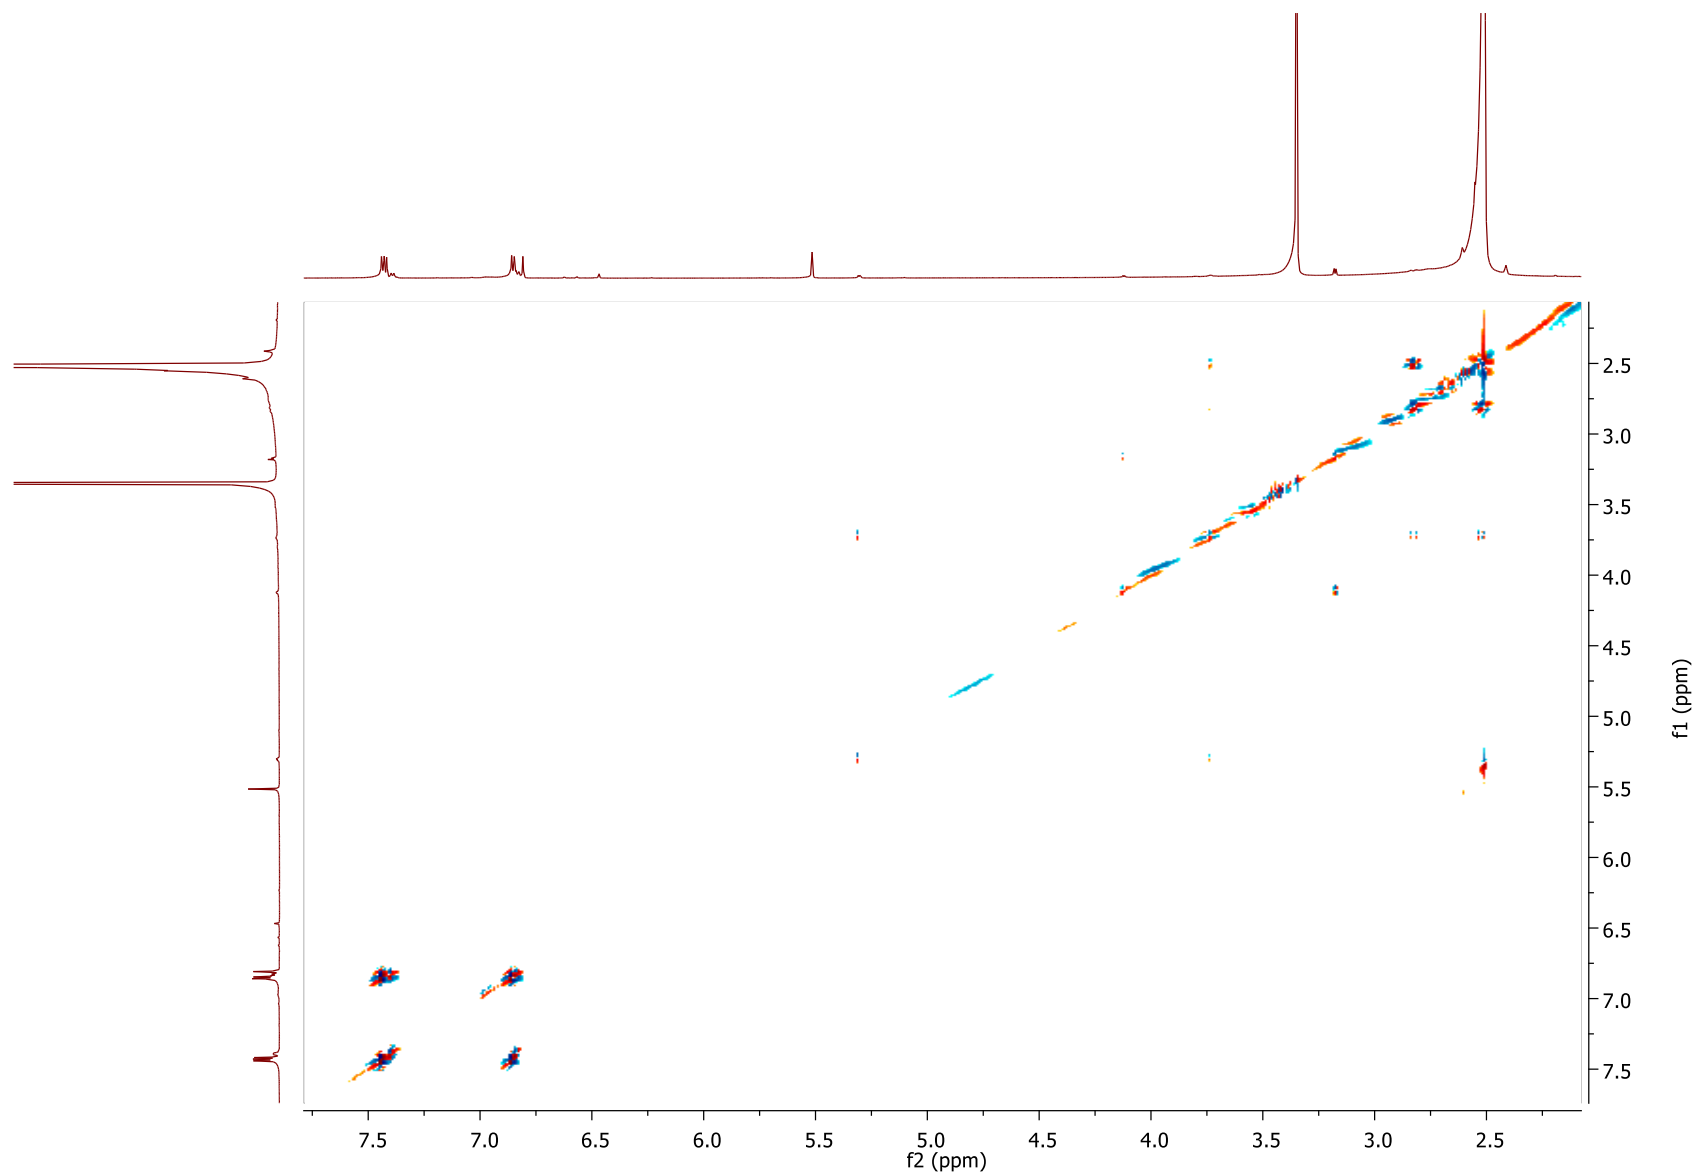

**Fig. S70.** COSY spectrum of **10**

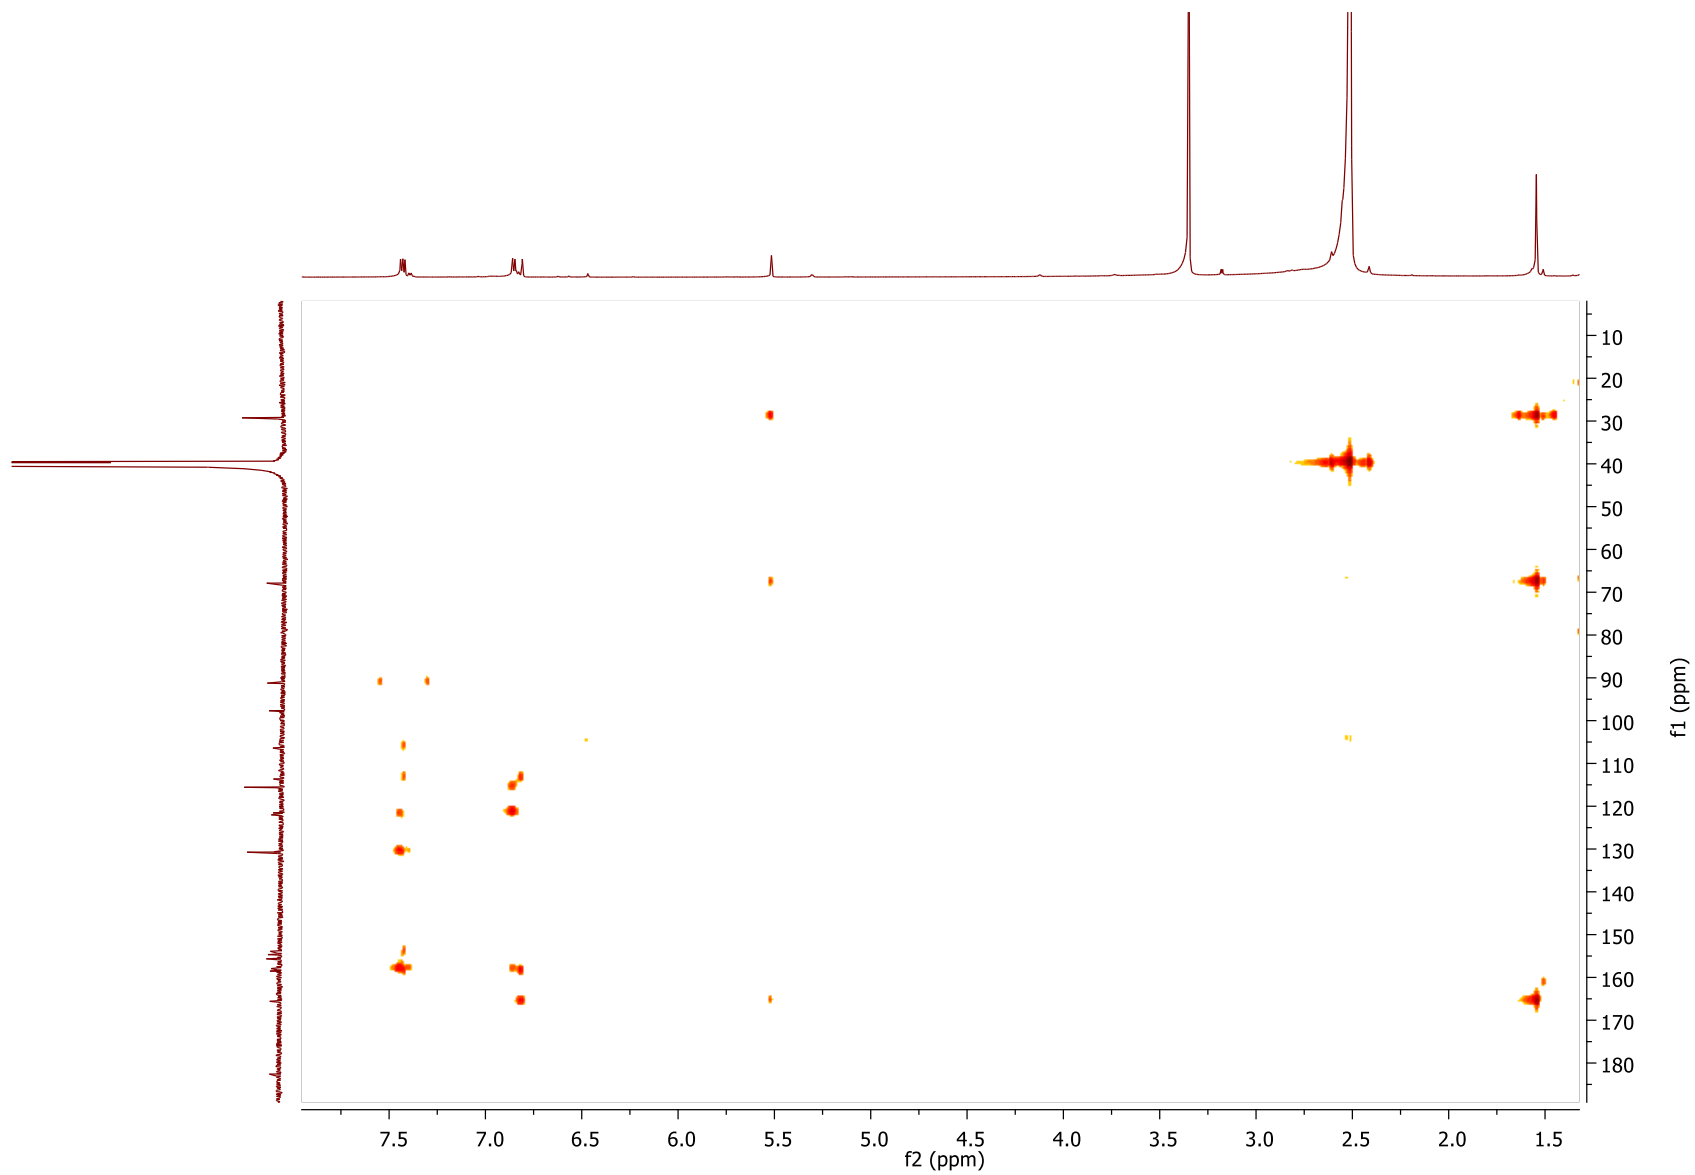

Fig. S71. HMBC spectrum of **10**

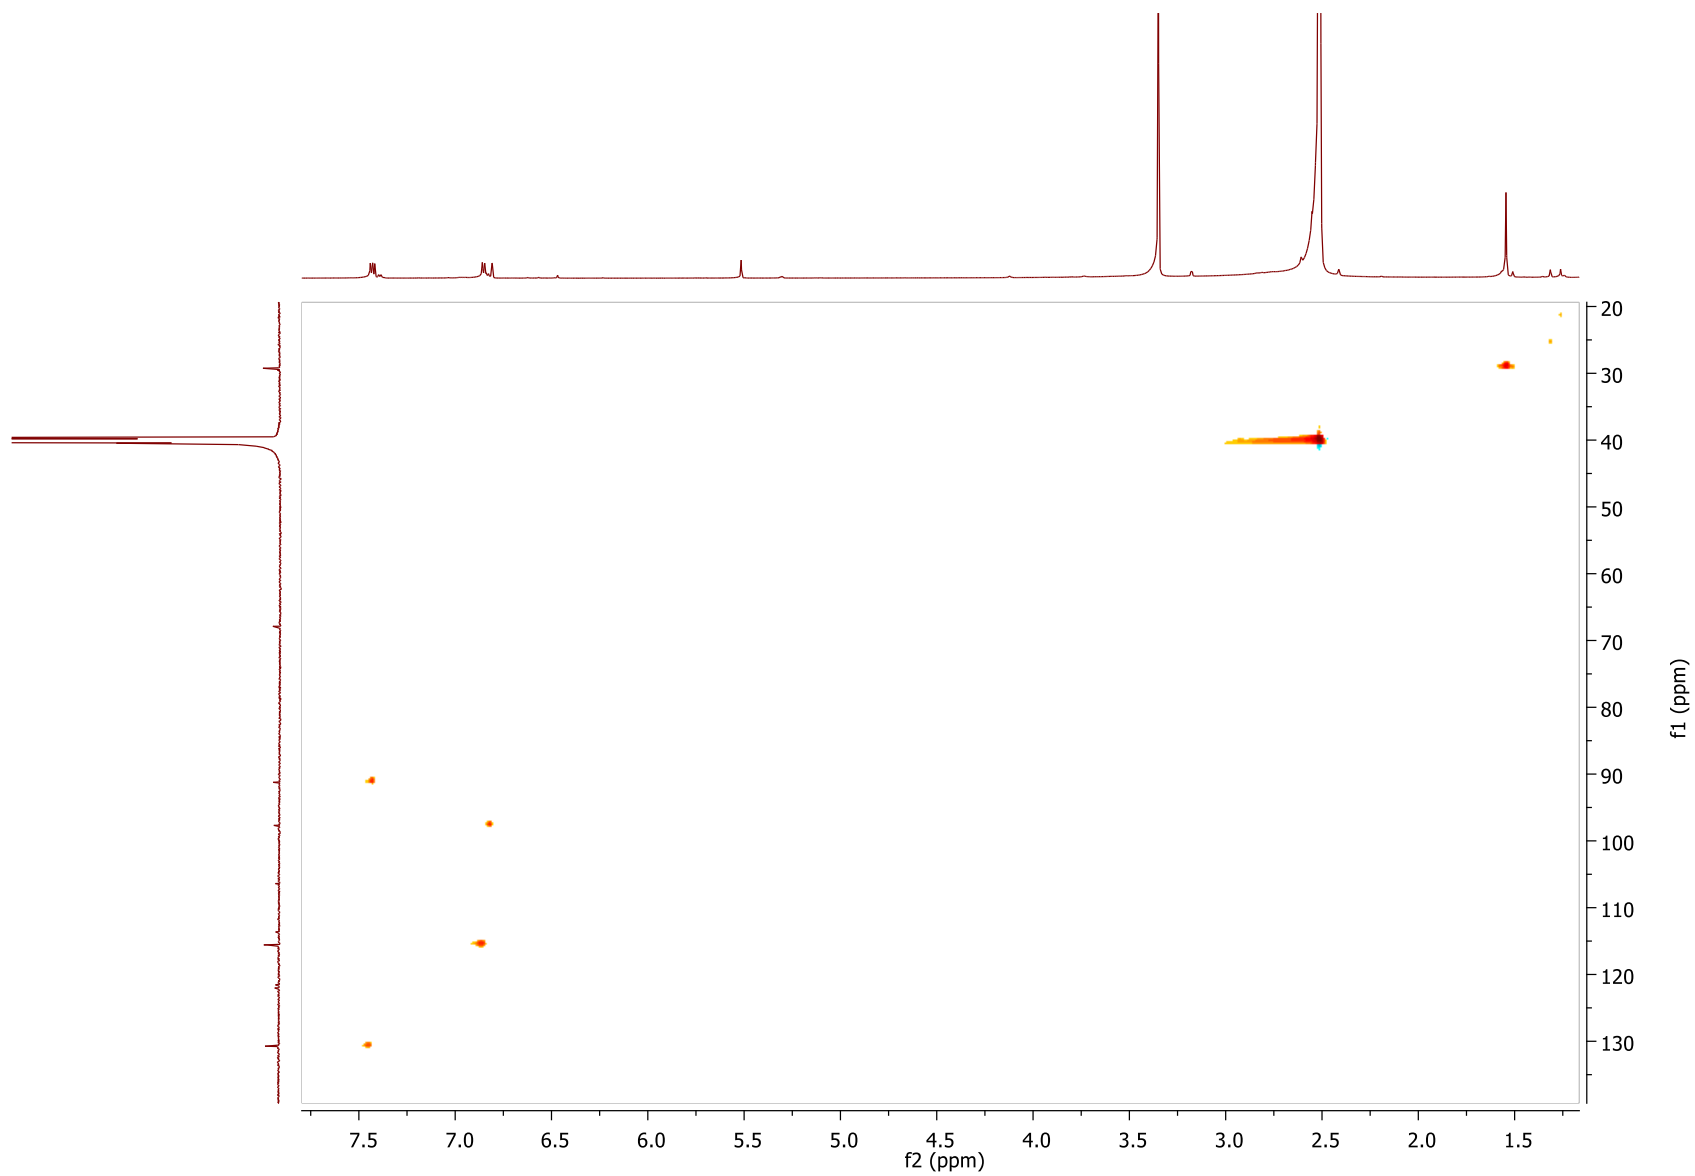

Fig. S72. HSQC spectrum of **10**

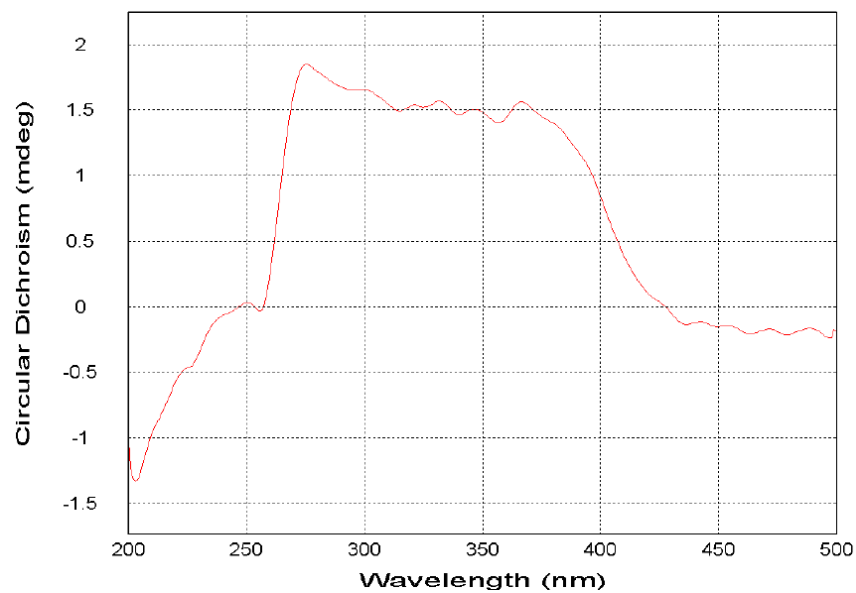

**Fig. S73.** CD spectrum of **2**. Concentration  $857 \mu\text{g mL}^{-1}$ .

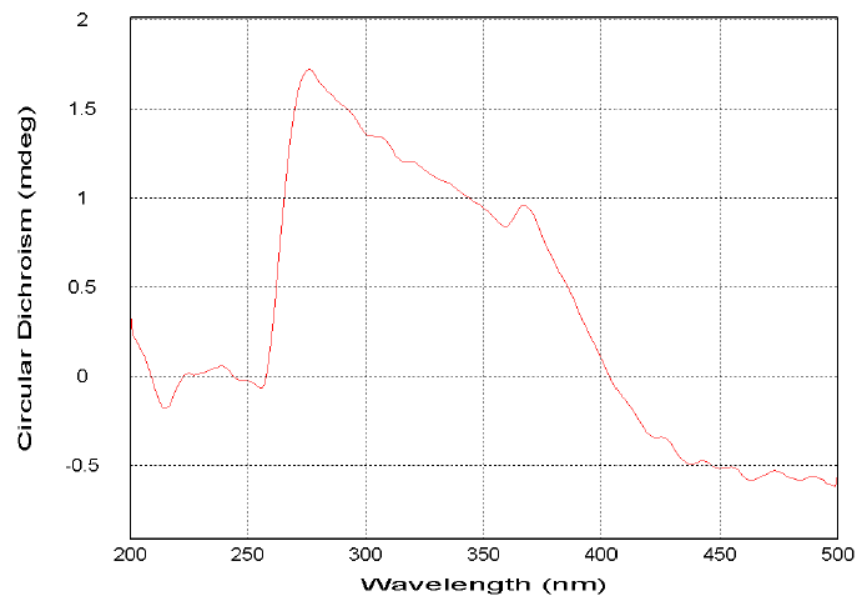

**Fig. S74.** CD spectrum of **5**. Concentration  $857 \mu\text{g mL}^{-1}$ .

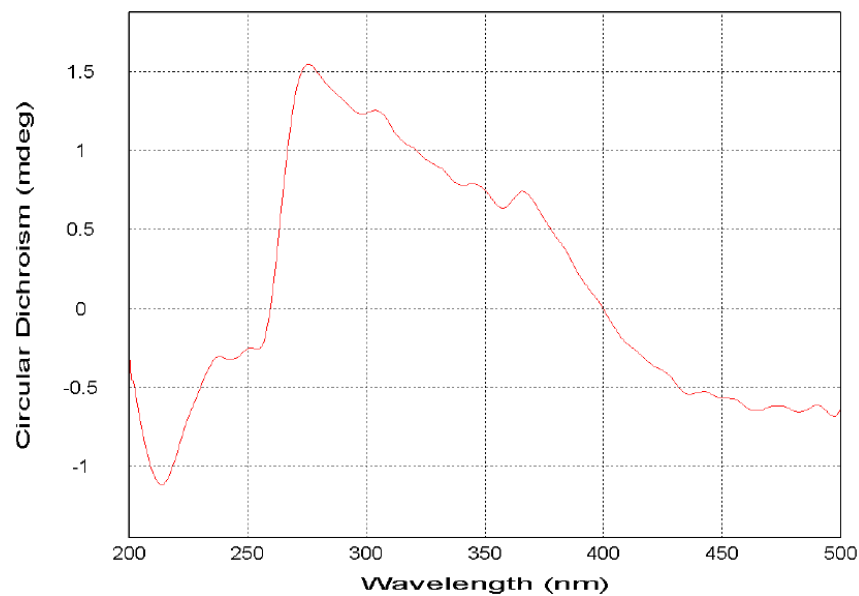

**Fig. S75.** CD spectrum of **8**. Concentration  $857 \mu\text{g mL}^{-1}$ .

**Table S1.**  $^1\text{H}$  and  $^{13}\text{C}$  NMR spectroscopic data for **4,9,10** in  $(\text{CD}_3)_2\text{SO}$  [ $\delta_{\text{H}}$ , multiplicity ( $J$  (Hz))];  $\delta_{\text{C}}$ , type]

| Position | 4                    |                                                | 9                                                    |                        | 10                  |                        |
|----------|----------------------|------------------------------------------------|------------------------------------------------------|------------------------|---------------------|------------------------|
|          | $\delta_{\text{H}}$  | $\delta_{\text{C}}$                            | $\delta_{\text{H}}$                                  | $\delta_{\text{C}}$    | $\delta_{\text{H}}$ | $\delta_{\text{C}}$    |
| 2        |                      | 164.1, C <sub>q</sub>                          | 8.37, s                                              | 154.67, CH             | 8.52, s             | 155.63, CH             |
| 3        | 6.79, s              | 103.1, CH                                      |                                                      | 122.85, C <sub>q</sub> |                     | 121.99, C <sub>q</sub> |
| 4        |                      | 182.6, C <sub>q</sub>                          |                                                      | 180.88, C <sub>q</sub> |                     | 182.59, C <sub>q</sub> |
| 4a       |                      | 104.1, C <sub>q</sub>                          |                                                      | 105.74, C <sub>q</sub> |                     | 106.41, C <sub>q</sub> |
| 5        |                      | 162.1, C <sub>q</sub>                          |                                                      | 157.14, C <sub>q</sub> |                     | 158.52, C <sub>q</sub> |
| 6        | 6.29, s              | 98.8, CH                                       |                                                      | 105.26, C <sub>q</sub> |                     | 113.66, C <sub>q</sub> |
| 7        |                      | 161.6, C <sub>q</sub>                          |                                                      | 159.72, C <sub>q</sub> |                     | 165.61, C <sub>q</sub> |
| 8        |                      | 106.5, C <sub>q</sub>                          | 6.47, s                                              | 94.94, CH              | 6.81, CH            | 91.24, CH              |
| 8a       |                      | 154.9, C <sub>q</sub>                          |                                                      | 157.95, C <sub>q</sub> |                     | 153.93, C <sub>q</sub> |
| 1'       |                      | 122.0, C <sub>q</sub>                          |                                                      | 121.49, C <sub>q</sub> |                     | 121.58, C <sub>q</sub> |
| 2',6'    | 7.91, d, $J = 8.5$   | 128.8, CH                                      | 7.39, d, $J = 8.4$                                   | 130.64, CH             | 7.43, d, $J = 8.4$  | 130.74, CH             |
| 3',5'    | 6.95, d, $J = 8.5$   | 116.5, CH                                      | 6.84, d, $J = 8.4$                                   | 115.54, CH             | 6.85, d, $J = 8.4$  | 115.57, CH             |
| 4'       |                      | 159.5, C <sub>q</sub>                          |                                                      | 156.30, C <sub>q</sub> |                     | 157.93, C <sub>q</sub> |
| 1''      | 3.45, d, $J = 6.3$   | 21.8, CH <sub>2</sub>                          |                                                      |                        |                     |                        |
| 2''      | 5.20, <i>ca.</i> t   | 122.9, CH                                      |                                                      | 81.66, C <sub>q</sub>  |                     | 130.74, CH             |
| 3''      |                      | 131.5, C <sub>q</sub>                          | 5.74, d, $J = 9.8$                                   | 126.69, CH             | 5.52, s             | 115.57, CH             |
| 4''      | 1.64, s or 1.77, s   | 18.3, CH <sub>3</sub> or 25.9, CH <sub>3</sub> | 6.69, d, $J = 9.8$                                   | 116.47, CH             |                     | 67.90, C <sub>q</sub>  |
| 5''      | 1.64, s or 1.77, s   |                                                | 3.49, dd, $J = 11.9, 5.6$ ; 3.50, dd, $J = 11.9.5.6$ | 67.50, CH <sub>2</sub> | 1.54, s             | 29.25, CH <sub>3</sub> |
| 6''      |                      |                                                | 1.36, s                                              | 23.69, CH <sub>3</sub> | 1.54, s             | 29.25, CH <sub>3</sub> |
| HO-5     | 12.81, s             |                                                | 13.36, s                                             |                        | 13.74, s            |                        |
| HO-7     | 10.4, br or 10.8, br |                                                | 5.13, t, $J = 5.6$                                   |                        |                     |                        |
| HO-4'    | 10.4, br or 10.8, br |                                                | 9.64, s                                              |                        | 9.64, s             |                        |

**Table S2:** Insulin secretion data

| Insulin secretion (ng islet <sup>-1</sup> h <sup>-1</sup> )<br>mean ± SEM | Compound No. |
|---------------------------------------------------------------------------|--------------|
| 8.51 ± 0.38                                                               | Control      |
| 38.51 ± 1.55                                                              | 1            |
| 2.16 ± 0.95                                                               | 2            |
| 32.86 ± 2.45                                                              | 3            |
| 3.47 ± 0.36                                                               | 4            |
| 35.23 ± 2.14                                                              | 5            |
| 32.16 ± 0.69                                                              | 6            |
| 12.08 ± 1.09                                                              | 7            |
| 19.88 ± 0.53                                                              | 8            |
| 25.85 ± 1.07                                                              | 9            |
| 42.63 ± 1.48                                                              | 10           |
| 19.49 ± 1.69                                                              | TB           |

Glucose-stimulated insulin secretion by pure compounds. Murine islets were incubated in KRB buffer containing 16.7 glucose supplemented with or without pure compound (200 μM) / TB (200 μM) and secreted insulin was measured by ELISA. All data points are an average of a minimum of  $n = 3$  separate experiments and are expressed as means ± SEM. TB, (tolbutamide) was used as a positive control.
